# Supplementary material for: Computational study of molecules for quadratic nonlinear optical applications: orthogonal orientation of dipole vector and hyperpolarisability pseudo vector
Source: Royal Society of Chemistry journal article supplement (doi:10.1039/a907340j), 2000-01-01
Supplement: tprs.doc [file tprs.doc]

*Supplementary Information*

*for*

**Computational Study of Molecules for Quadratic NLO Applications :**

**Orthogonal Orientation of Dipole Vector and**

**Hyperpolarizability Pseudo Vector**

S. Sharma, P. Gangopadhyay, A. Swathi and T.P.Radhakrishnan*

***Contents***

Pages 2-44 : AM1 optimized geometries of molecules C1 - C16, B1 - B16, P1 - P16 and D1 - D16. The geometries are in Cartesian coordinate form and are taken from the single point hyperpolarizability calculation job carried out following the full optimization job.

Page 45 :Calculated (AM1) heat of formation (Hf) and gradient norm (GN) of the molecules studied. Molecule designations are explained in the text.

Page 45 : Comparison of ****** and ****** calculated using the AM1 method and *ab initio* method (HF/6-31G* level) for two test molecules.

AM1 PRECISE ISCF LET POLAR GRAD XYZ

C1

| C | 2.9212000 | 1 | 1.0643000 | 1 | -.0259000 | 1 |
| --- | --- | --- | --- | --- | --- | --- |
| C | 3.9506000 | 1 | .1067000 | 1 | -.0307000 | 1 |
| C | 2.8794000 | 1 | -.9700000 | 1 | -.1098000 | 1 |
| C | 1.8518000 | 1 | -.0786000 | 1 | -.1080000 | 1 |
| N | 3.0063000 | 1 | -2.4112000 | 1 | -.1414000 | 1 |
| S | .0000000 | 1 | .0000000 | 1 | .0000000 | 1 |
| O | -.1292000 | 1 | 1.0129000 | 1 | .9626000 | 1 |
| O | -.3457000 | 1 | -1.2819000 | 1 | .3967000 | 1 |
| O | -.3280000 | 1 | .4079000 | 1 | -1.2949000 | 1 |
| N | 2.7445000 | 1 | 2.3838000 | 1 | .0000000 | 1 |
| N | 5.3718000 | 1 | .0000000 | 1 | .0000000 | 1 |
| C | 6.0308000 | 1 | 1.3304000 | 1 | -.1697000 | 1 |
| C | 5.8464000 | 1 | -.8803000 | 1 | -1.1235000 | 1 |
| C | 5.8231000 | 1 | -.5896000 | 1 | 1.3047000 | 1 |
| C | 3.7261000 | 1 | 3.2969000 | 1 | .5278000 | 1 |
| C | 1.4433000 | 1 | 2.9615000 | 1 | -.3018000 | 1 |
| H | 7.1339000 | 1 | 1.1806000 | 1 | -.3119000 | 1 |
| H | 5.6004000 | 1 | 1.8429000 | 1 | -1.0692000 | 1 |
| H | 5.8678000 | 1 | 1.9494000 | 1 | .7496000 | 1 |
| H | 6.9642000 | 1 | -.8234000 | 1 | -1.1833000 | 1 |
| H | 5.5426000 | 1 | -1.9433000 | 1 | -.9285000 | 1 |
| H | 5.3850000 | 1 | -.5249000 | 1 | -2.0807000 | 1 |
| H | 5.4781000 | 1 | .0715000 | 1 | 2.1406000 | 1 |
| H | 5.3622000 | 1 | -1.6090000 | 1 | 1.4250000 | 1 |
| H | 6.9401000 | 1 | -.6678000 | 1 | 1.3013000 | 1 |
| H | 3.2205000 | 1 | 4.2537000 | 1 | .8328000 | 1 |
| H | 4.4984000 | 1 | 3.5369000 | 1 | -.2519000 | 1 |
| H | 4.2220000 | 1 | 2.8644000 | 1 | 1.4372000 | 1 |
| H | 1.6044000 | 1 | 3.9671000 | 1 | -.7710000 | 1 |
| H | .8332000 | 1 | 3.0568000 | 1 | .6400000 | 1 |
| H | .8824000 | 1 | 2.3012000 | 1 | -1.0220000 | 1 |
| O | 2.1386000 | 1 | -3.0894000 | 1 | -.6043000 | 1 |
| O | 4.0338000 | 1 | -2.9013000 | 1 | .2842000 | 1 |

*************************************************

AM1 PRECISE ISCF LET POLAR GRAD XYZ

C2

| C | 2.8514000 | 1 | 1.0844000 | 1 | .0225000 | 1 |
| --- | --- | --- | --- | --- | --- | --- |
| C | 3.8803000 | 1 | .1178000 | 1 | -.0107000 | 1 |
| C | 2.8095000 | 1 | -.9653000 | 1 | .0146000 | 1 |
| C | 1.7990000 | 1 | -.0527000 | 1 | .0641000 | 1 |
| N | 5.2978000 | 1 | .0000000 | 1 | .0000000 | 1 |
| C | 5.9785000 | 1 | 1.2647000 | 1 | .4083000 | 1 |
| C | 5.7917000 | 1 | -.3921000 | 1 | -1.3622000 | 1 |
| C | 5.7007000 | 1 | -1.0661000 | 1 | .9808000 | 1 |
| S | .0000000 | 1 | .0000000 | 1 | .0000000 | 1 |
| O | -.2134000 | 1 | .8046000 | 1 | -1.1355000 | 1 |
| O | -.3529000 | 1 | -1.3466000 | 1 | -.1130000 | 1 |
| O | -.3276000 | 1 | .6465000 | 1 | 1.2034000 | 1 |
| N | 2.6853000 | 1 | 2.4037000 | 1 | .0000000 | 1 |
| C | 1.3550000 | 1 | 2.9712000 | 1 | .1731000 | 1 |
| C | 3.7414000 | 1 | 3.3192000 | 1 | -.3414000 | 1 |
| C | 2.9570000 | 1 | -2.3782000 | 1 | -.1141000 | 1 |
| C | 2.3089000 | 1 | -3.3342000 | 1 | .5883000 | 1 |
| C | 2.5745000 | 1 | -4.7130000 | 1 | .3210000 | 1 |
| N | 2.7938000 | 1 | -5.8350000 | 1 | .1062000 | 1 |
| C | 1.3686000 | 1 | -3.0918000 | 1 | 1.6272000 | 1 |
| N | .5924000 | 1 | -2.9143000 | 1 | 2.4750000 | 1 |
| H | 7.0552000 | 1 | 1.0476000 | 1 | .6379000 | 1 |
| H | 5.9294000 | 1 | 2.0065000 | 1 | -.4298000 | 1 |
| H | 5.4732000 | 1 | 1.6770000 | 1 | 1.3202000 | 1 |
| H | 5.4629000 | 1 | .3803000 | 1 | -2.1043000 | 1 |
| H | 6.9087000 | 1 | -.4697000 | 1 | -1.3460000 | 1 |
| H | 5.3381000 | 1 | -1.3792000 | 1 | -1.6408000 | 1 |
| H | 6.8152000 | 1 | -1.1781000 | 1 | .9668000 | 1 |
| H | 5.3482000 | 1 | -.7670000 | 1 | 2.0025000 | 1 |
| H | 5.2167000 | 1 | -2.0355000 | 1 | .6946000 | 1 |
| H | .7445000 | 1 | 2.8098000 | 1 | -.7617000 | 1 |
| H | 1.4455000 | 1 | 4.0654000 | 1 | .3942000 | 1 |
| H | .8288000 | 1 | 2.4616000 | 1 | 1.0321000 | 1 |
| H | 4.4234000 | 1 | 3.4798000 | 1 | .5369000 | 1 |
| H | 3.3024000 | 1 | 4.3109000 | 1 | -.6365000 | 1 |
| H | 4.3319000 | 1 | 2.9299000 | 1 | -1.2140000 | 1 |
| H | 3.6745000 | 1 | -2.6945000 | 1 | -.8993000 | 1 |

*************************************************

AM1 PRECISE ISCF LET POLAR GRAD XYZ

C3

| C | 2.5794807 | 1 | 1.0410993 | 1 | .0324121 | 1 |
| --- | --- | --- | --- | --- | --- | --- |
| C | 3.6064587 | 1 | .0938864 | 1 | .0864606 | 1 |
| C | 2.5461976 | 1 | -1.0102274 | 1 | .1424378 | 1 |
| C | 1.5180041 | 1 | -.1163300 | 1 | .0428780 | 1 |
| N | 5.0279667 | 1 | -.0000024 | 1 | .0000091 | 1 |
| C | 5.6559859 | 1 | 1.3387063 | 1 | -.2153714 | 1 |
| C | 5.5899135 | 1 | -.5859988 | 1 | 1.2617982 | 1 |
| C | 5.4161939 | 1 | -.8696876 | 1 | -1.1640054 | 1 |
| C | .0000151 | 1 | -.0000069 | 1 | -.0000127 | 1 |
| O | -.5015072 | 1 | .6543010 | 1 | .9466198 | 1 |
| O | -.5623946 | 1 | -.5031827 | 1 | -.9944919 | 1 |
| N | 2.3606968 | 1 | 2.3581127 | 1 | -.0000875 | 1 |
| C | 1.0003071 | 1 | 2.8416255 | 1 | -.1865034 | 1 |
| C | 3.3435911 | 1 | 3.3279235 | 1 | .4024844 | 1 |
| N | 2.6694021 | 1 | -2.4289985 | 1 | .3111146 | 1 |
| O | 1.6962280 | 1 | -3.1224751 | 1 | .3906921 | 1 |
| O | 3.7853109 | 1 | -2.9099063 | 1 | .3839826 | 1 |
| H | 6.7543041 | 1 | 1.2042519 | 1 | -.3998640 | 1 |
| H | 5.1817325 | 1 | 1.8286116 | 1 | -1.1054302 | 1 |
| H | 5.5130291 | 1 | 1.9691890 | 1 | .7001768 | 1 |
| H | 6.7068319 | 1 | -.6105773 | 1 | 1.1833897 | 1 |
| H | 5.2710952 | 1 | .0468089 | 1 | 2.1291151 | 1 |
| H | 5.1907349 | 1 | -1.6288065 | 1 | 1.3954047 | 1 |
| H | 4.9344087 | 1 | -.4663172 | 1 | -2.0919909 | 1 |
| H | 6.5319755 | 1 | -.8616133 | 1 | -1.2647113 | 1 |
| H | 5.0628688 | 1 | -1.9210635 | 1 | -.9862521 | 1 |
| H | 1.0377191 | 1 | 3.9013880 | 1 | -.5489951 | 1 |
| H | .4712143 | 1 | 2.2051211 | 1 | -.9486736 | 1 |
| H | .4249349 | 1 | 2.7729532 | 1 | .7794343 | 1 |
| H | 2.8381201 | 1 | 4.3050811 | 1 | .6321319 | 1 |
| H | 3.8815052 | 1 | 2.9904887 | 1 | 1.3289011 | 1 |
| H | 4.0854740 | 1 | 3.5020818 | 1 | -.4229927 | 1 |

*************************************************

AM1 PRECISE ISCF LET POLAR GRAD XYZ

C4

| C | 2.5825000 | 1 | 1.1142000 | 1 | .0054000 | 1 |
| --- | --- | --- | --- | --- | --- | --- |
| C | 3.5905000 | 1 | .1400000 | 1 | -.0740000 | 1 |
| C | 2.5126000 | 1 | -.9469000 | 1 | -.1123000 | 1 |
| C | 1.5145000 | 1 | -.0271000 | 1 | .0080000 | 1 |
| N | 5.0061000 | 1 | .0001000 | 1 | -.0002000 | 1 |
| C | 5.6739000 | 1 | 1.2177000 | 1 | .5509000 | 1 |
| C | 5.3416000 | 1 | -1.1498000 | 1 | .9091000 | 1 |
| C | 5.5659000 | 1 | -.2859000 | 1 | -1.3618000 | 1 |
| C | .0000000 | 1 | .0008000 | 1 | -.0003000 | 1 |
| O | -.5597000 | 1 | .6380000 | 1 | .9288000 | 1 |
| O | -.5510000 | 1 | -.6092000 | 1 | -.9456000 | 1 |
| N | 2.4602000 | 1 | 2.4414000 | 1 | -.0003000 | 1 |
| C | 3.5393000 | 1 | 3.3159000 | 1 | -.3768000 | 1 |
| C | 1.1831000 | 1 | 3.0804000 | 1 | .2503000 | 1 |
| C | 2.6407000 | 1 | -2.3381000 | 1 | -.3720000 | 1 |
| C | 2.0603000 | 1 | -3.3471000 | 1 | .3181000 | 1 |
| C | 1.2795000 | 1 | -3.1751000 | 1 | 1.4933000 | 1 |
| N | .6546000 | 1 | -3.0521000 | 1 | 2.4662000 | 1 |
| C | 2.2415000 | 1 | -4.6959000 | 1 | -.1087000 | 1 |
| N | 2.3930000 | 1 | -5.7931000 | 1 | -.4631000 | 1 |
| H | 6.7225000 | 1 | .9601000 | 1 | .8554000 | 1 |
| H | 5.7121000 | 1 | 2.0161000 | 1 | -.2335000 | 1 |
| H | 5.0985000 | 1 | 1.5810000 | 1 | 1.4425000 | 1 |
| H | 6.4531000 | 1 | -1.2822000 | 1 | .9391000 | 1 |
| H | 4.9424000 | 1 | -.9269000 | 1 | 1.9327000 | 1 |
| H | 4.8562000 | 1 | -2.0837000 | 1 | .5223000 | 1 |
| H | 5.3137000 | 1 | .5656000 | 1 | -2.0452000 | 1 |
| H | 6.6763000 | 1 | -.4132000 | 1 | -1.2895000 | 1 |
| H | 5.0906000 | 1 | -1.2219000 | 1 | -1.7562000 | 1 |
| H | 3.1194000 | 1 | 4.2953000 | 1 | -.7340000 | 1 |
| H | 4.2109000 | 1 | 3.5164000 | 1 | .5012000 | 1 |
| H | 4.1372000 | 1 | 2.8637000 | 1 | -1.2139000 | 1 |
| H | 1.3541000 | 1 | 3.9655000 | 1 | .9188000 | 1 |
| H | .7354000 | 1 | 3.4250000 | 1 | -.7198000 | 1 |
| H | .4685000 | 1 | 2.3632000 | 1 | .7549000 | 1 |
| H | 3.2685000 | 1 | -2.5889000 | 1 | -1.2511000 | 1 |

*************************************************

AM1 PRECISE ISCF LET POLAR GRAD XYZ

C5

| C | 3.0106000 | 1 | .9982000 | 1 | .0018000 | 1 |
| --- | --- | --- | --- | --- | --- | --- |
| C | 4.0047000 | 1 | .0363000 | 1 | .0022000 | 1 |
| C | 2.9006000 | 1 | -1.0248000 | 1 | -.0020000 | 1 |
| C | 1.9021000 | 1 | -.0941000 | 1 | .0006000 | 1 |
| N | 5.4312000 | 1 | .0000000 | 1 | .0000000 | 1 |
| C | 5.9587000 | 1 | 1.4026000 | 1 | .0387000 | 1 |
| C | 5.9340000 | 1 | -.6722000 | 1 | -1.2425000 | 1 |
| C | 5.9390000 | 1 | -.7371000 | 1 | 1.2028000 | 1 |
| S | .0000000 | 1 | .0000000 | 1 | .0000000 | 1 |
| O | -.1395000 | 1 | 1.3905000 | 1 | .0006000 | 1 |
| O | -.3016000 | 1 | -.6384000 | 1 | 1.1911000 | 1 |
| O | -.2984000 | 1 | -.6370000 | 1 | -1.1926000 | 1 |
| O | 3.1298000 | 1 | 2.3168000 | 1 | .0000000 | 1 |
| C | 1.9171000 | 1 | 3.1122000 | 1 | -.0046000 | 1 |
| N | 3.0326000 | 1 | -2.4596000 | 1 | -.0132000 | 1 |
| O | 2.0695000 | 1 | -3.1660000 | 1 | .0225000 | 1 |
| O | 4.1567000 | 1 | -2.9203000 | 1 | -.0588000 | 1 |
| H | 7.0782000 | 1 | 1.3726000 | 1 | .0349000 | 1 |
| H | 5.5800000 | 1 | 1.9622000 | 1 | -.8572000 | 1 |
| H | 5.5848000 | 1 | 1.9090000 | 1 | .9675000 | 1 |
| H | 7.0538000 | 1 | -.6354000 | 1 | -1.2446000 | 1 |
| H | 5.5831000 | 1 | -1.7409000 | 1 | -1.2506000 | 1 |
| H | 5.5240000 | 1 | -.1369000 | 1 | -2.1378000 | 1 |
| H | 5.5871000 | 1 | -1.8042000 | 1 | 1.1581000 | 1 |
| H | 7.0586000 | 1 | -.7026000 | 1 | 1.1999000 | 1 |
| H | 5.5359000 | 1 | -.2475000 | 1 | 2.1269000 | 1 |
| H | 1.3144000 | 1 | 2.8884000 | 1 | .9087000 | 1 |
| H | 2.3226000 | 1 | 4.1544000 | 1 | -.0033000 | 1 |
| H | 1.3195000 | 1 | 2.8883000 | 1 | -.9222000 | 1 |

*************************************************

AM1 PRECISE ISCF LET POLAR GRAD XYZ

C6

| C | 2.8760000 | 1 | .9613000 | 1 | .0564000 | 1 |
| --- | --- | --- | --- | --- | --- | --- |
| C | 3.8837000 | 1 | .0069000 | 1 | .1002000 | 1 |
| C | 2.7862000 | 1 | -1.0677000 | 1 | .1674000 | 1 |
| C | 1.8006000 | 1 | -.1293000 | 1 | .1000000 | 1 |
| N | 5.3053000 | 1 | -.0003000 | 1 | -.0001000 | 1 |
| C | 5.8010000 | 1 | 1.4059000 | 1 | -.1515000 | 1 |
| C | 5.9225000 | 1 | -.6001000 | 1 | 1.2253000 | 1 |
| C | 5.7264000 | 1 | -.7991000 | 1 | -1.1965000 | 1 |
| S | .0002000 | 1 | .0002000 | 1 | .0000000 | 1 |
| O | -.3000000 | 1 | .7178000 | 1 | 1.1663000 | 1 |
| O | -.4065000 | 1 | -1.3326000 | 1 | -.0653000 | 1 |
| O | -.1362000 | 1 | .7640000 | 1 | -1.1731000 | 1 |
| O | 2.9167000 | 1 | 2.2809000 | 1 | .0000000 | 1 |
| C | 1.6257000 | 1 | 2.9554000 | 1 | -.0058000 | 1 |
| C | 2.8139000 | 1 | -2.4968000 | 1 | .2090000 | 1 |
| C | 3.2265000 | 1 | -3.2551000 | 1 | 1.2483000 | 1 |
| C | 3.6715000 | 1 | -2.7245000 | 1 | 2.4930000 | 1 |
| N | 4.0205000 | 1 | -2.3003000 | 1 | 3.5186000 | 1 |
| C | 3.2127000 | 1 | -4.6787000 | 1 | 1.1636000 | 1 |
| N | 3.2059000 | 1 | -5.8394000 | 1 | 1.0928000 | 1 |
| H | 6.9155000 | 1 | 1.3925000 | 1 | -.2605000 | 1 |
| H | 5.3244000 | 1 | 1.8677000 | 1 | -1.0566000 | 1 |
| H | 5.5028000 | 1 | 1.9963000 | 1 | .7553000 | 1 |
| H | 5.5503000 | 1 | -.0528000 | 1 | 2.1310000 | 1 |
| H | 5.6185000 | 1 | -1.6775000 | 1 | 1.2937000 | 1 |
| H | 7.0377000 | 1 | -.5205000 | 1 | 1.1522000 | 1 |
| H | 6.8452000 | 1 | -.8100000 | 1 | -1.2567000 | 1 |
| H | 5.3339000 | 1 | -1.8445000 | 1 | -1.0915000 | 1 |
| H | 5.2905000 | 1 | -.3341000 | 1 | -2.1187000 | 1 |
| H | 1.0396000 | 1 | 2.6503000 | 1 | .8980000 | 1 |
| H | 1.9197000 | 1 | 4.0324000 | 1 | .0200000 | 1 |
| H | 1.0740000 | 1 | 2.6818000 | 1 | -.9414000 | 1 |
| H | 2.3948000 | 1 | -2.9898000 | 1 | -.6956000 | 1 |

*************************************************

AM1 PRECISE ISCF LET POLAR GRAD XYZ

C7

| C | 2.6071000 | 1 | .9612000 | 1 | -.0057000 | 1 |
| --- | --- | --- | --- | --- | --- | --- |
| C | 3.6103000 | 1 | .0160000 | 1 | -.0221000 | 1 |
| C | 2.5299000 | 1 | -1.0786000 | 1 | -.0504000 | 1 |
| C | 1.5192000 | 1 | -.1553000 | 1 | -.0150000 | 1 |
| N | 5.0385000 | 1 | .0000000 | 1 | -.0001000 | 1 |
| C | 5.5448000 | 1 | 1.4081000 | 1 | .0855000 | 1 |
| C | 5.5370000 | 1 | -.7644000 | 1 | 1.1900000 | 1 |
| C | 5.5692000 | 1 | -.6334000 | 1 | -1.2512000 | 1 |
| C | -.0001000 | 1 | .0001000 | 1 | -.0001000 | 1 |
| O | -.4282000 | 1 | .9061000 | 1 | -.7575000 | 1 |
| O | -.6261000 | 1 | -.7442000 | 1 | .7776000 | 1 |
| N | 2.6844000 | 1 | -2.5015000 | 1 | -.1263000 | 1 |
| O | 1.7337000 | 1 | -3.2230000 | 1 | -.2040000 | 1 |
| O | 3.8170000 | 1 | -2.9479000 | 1 | -.1236000 | 1 |
| O | 2.6533000 | 1 | 2.2873000 | 1 | .0013000 | 1 |
| C | 1.3745000 | 1 | 2.9704000 | 1 | -.0877000 | 1 |
| H | 6.6637000 | 1 | 1.3958000 | 1 | .0697000 | 1 |
| H | 5.1481000 | 1 | 1.9954000 | 1 | -.7851000 | 1 |
| H | 5.1738000 | 1 | 1.8735000 | 1 | 1.0367000 | 1 |
| H | 6.6546000 | 1 | -.6952000 | 1 | 1.2188000 | 1 |
| H | 5.0944000 | 1 | -.3211000 | 1 | 2.1191000 | 1 |
| H | 5.2188000 | 1 | -1.8398000 | 1 | 1.0995000 | 1 |
| H | 5.2024000 | 1 | -1.6955000 | 1 | -1.3077000 | 1 |
| H | 5.1957000 | 1 | -.0592000 | 1 | -2.1380000 | 1 |
| H | 6.6886000 | 1 | -.6144000 | 1 | -1.2175000 | 1 |
| H | 1.6766000 | 1 | 4.0454000 | 1 | -.0574000 | 1 |
| H | .7370000 | 1 | 2.6829000 | 1 | .7820000 | 1 |
| H | .8646000 | 1 | 2.6896000 | 1 | -1.0436000 | 1 |

*************************************************

AM1 PRECISE ISCF LET POLAR GRAD XYZ

C8

| C | 2.5937000 | 1 | 1.0052000 | 1 | .0173000 | 1 |
| --- | --- | --- | --- | --- | --- | --- |
| C | 3.5848000 | 1 | .0383000 | 1 | .0165000 | 1 |
| C | 2.4927000 | 1 | -1.0449000 | 1 | .0800000 | 1 |
| C | 1.5085000 | 1 | -.1012000 | 1 | .0616000 | 1 |
| N | 5.0096000 | 1 | .0000000 | 1 | .0000000 | 1 |
| C | 5.5520000 | 1 | 1.3951000 | 1 | .0170000 | 1 |
| C | 5.4867000 | 1 | -.6974000 | 1 | -1.2375000 | 1 |
| C | 5.5144000 | 1 | -.7391000 | 1 | 1.2019000 | 1 |
| C | .0000000 | 1 | .0000000 | 1 | .0000000 | 1 |
| O | -.4733000 | 1 | 1.1653000 | 1 | .0506000 | 1 |
| O | -.6266000 | 1 | -1.0775000 | 1 | -.1133000 | 1 |
| O | 2.6918000 | 1 | 2.3251000 | 1 | .0000000 | 1 |
| C | 1.4482000 | 1 | 3.0740000 | 1 | .0500000 | 1 |
| C | 2.6177000 | 1 | -2.4642000 | 1 | .0885000 | 1 |
| C | 2.1909000 | 1 | -3.2778000 | 1 | 1.0806000 | 1 |
| C | 2.3315000 | 1 | -4.6927000 | 1 | .9698000 | 1 |
| N | 2.4482000 | 1 | -5.8463000 | 1 | .8781000 | 1 |
| C | 1.6096000 | 1 | -2.8088000 | 1 | 2.2920000 | 1 |
| N | 1.1473000 | 1 | -2.4270000 | 1 | 3.2885000 | 1 |
| H | 6.6716000 | 1 | 1.3548000 | 1 | .0112000 | 1 |
| H | 5.1740000 | 1 | 1.9460000 | 1 | -.8849000 | 1 |
| H | 5.1822000 | 1 | 1.9193000 | 1 | .9383000 | 1 |
| H | 6.6048000 | 1 | -.7588000 | 1 | -1.2203000 | 1 |
| H | 5.0412000 | 1 | -1.7264000 | 1 | -1.2666000 | 1 |
| H | 5.1411000 | 1 | -.1222000 | 1 | -2.1361000 | 1 |
| H | 5.1808000 | 1 | -.2017000 | 1 | 2.1278000 | 1 |
| H | 5.0768000 | 1 | -1.7725000 | 1 | 1.1994000 | 1 |
| H | 6.6327000 | 1 | -.7883000 | 1 | 1.1624000 | 1 |
| H | 1.8088000 | 1 | 4.1310000 | 1 | .0625000 | 1 |
| H | .8798000 | 1 | 2.7979000 | 1 | .9716000 | 1 |
| H | .8342000 | 1 | 2.8358000 | 1 | -.8526000 | 1 |
| H | 3.0867000 | 1 | -2.9057000 | 1 | -.8125000 | 1 |

*************************************************

AM1 PRECISE ISCF LET POLAR GRAD XYZ

C9

| C | 2.9755000 | 1 | 1.0904000 | 1 | .0106000 | 1 |
| --- | --- | --- | --- | --- | --- | --- |
| C | 3.9953000 | 1 | .0856000 | 1 | -.0529000 | 1 |
| C | 2.8848000 | 1 | -.9384000 | 1 | -.0925000 | 1 |
| C | 1.8831000 | 1 | -.0123000 | 1 | -.0119000 | 1 |
| N | 5.3597000 | 1 | .0000000 | 1 | .0000000 | 1 |
| C | 6.0908000 | 1 | .8724000 | 1 | .7808000 | 1 |
| C | 7.4851000 | 1 | .8194000 | 1 | .8275000 | 1 |
| C | 8.1713000 | 1 | -.1553000 | 1 | .0991000 | 1 |
| C | 7.4333000 | 1 | -1.0533000 | 1 | -.6713000 | 1 |
| C | 6.0384000 | 1 | -.9564000 | 1 | -.7243000 | 1 |
| S | .0000000 | 1 | .0000000 | 1 | .0000000 | 1 |
| O | -.2710000 | 1 | -.2580000 | 1 | -1.3373000 | 1 |
| O | -.2863000 | 1 | -.9774000 | 1 | .9383000 | 1 |
| O | -.2273000 | 1 | 1.3206000 | 1 | .4041000 | 1 |
| N | 2.9351000 | 1 | 2.4110000 | 1 | .0000000 | 1 |
| C | 4.1284000 | 1 | 3.2086000 | 1 | -.1774000 | 1 |
| C | 1.6887000 | 1 | 3.1494000 | 1 | .1421000 | 1 |
| N | 2.9797000 | 1 | -2.3819000 | 1 | -.1624000 | 1 |
| O | 1.9958000 | 1 | -3.0496000 | 1 | -.2839000 | 1 |
| O | 4.0850000 | 1 | -2.8779000 | 1 | -.1100000 | 1 |
| H | 5.5162000 | 1 | 1.5965000 | 1 | 1.3870000 | 1 |
| H | 8.0235000 | 1 | 1.5434000 | 1 | 1.4589000 | 1 |
| H | 9.2696000 | 1 | -.2168000 | 1 | .1392000 | 1 |
| H | 7.9254000 | 1 | -1.8475000 | 1 | -1.2558000 | 1 |
| H | 5.4284000 | 1 | -1.6572000 | 1 | -1.3307000 | 1 |
| H | 3.8840000 | 1 | 4.1015000 | 1 | -.8149000 | 1 |
| H | 4.5001000 | 1 | 3.5666000 | 1 | .8206000 | 1 |
| H | 4.9329000 | 1 | 2.6216000 | 1 | -.6924000 | 1 |
| H | 1.9087000 | 1 | 4.2480000 | 1 | .1658000 | 1 |
| H | 1.0018000 | 1 | 2.9133000 | 1 | -.7180000 | 1 |
| H | 1.1647000 | 1 | 2.8428000 | 1 | 1.0910000 | 1 |

*************************************************

AM1 PRECISE ISCF LET POLAR GRAD XYZ

C10

| C | 2.8354000 | 1 | 1.1185000 | 1 | -.0592000 | 1 |
| --- | --- | --- | --- | --- | --- | --- |
| C | 3.8908000 | 1 | .1201000 | 1 | -.2453000 | 1 |
| C | 2.7818000 | 1 | -.8799000 | 1 | -.4691000 | 1 |
| C | 1.7942000 | 1 | .0279000 | 1 | -.1833000 | 1 |
| N | 5.2152000 | 1 | .0000000 | 1 | .0000000 | 1 |
| C | 5.9490000 | 1 | 1.0018000 | 1 | .6087000 | 1 |
| C | 7.3266000 | 1 | .8865000 | 1 | .8113000 | 1 |
| C | 7.9997000 | 1 | -.2734000 | 1 | .4334000 | 1 |
| C | 7.2567000 | 1 | -1.3112000 | 1 | -.1340000 | 1 |
| C | 5.8866000 | 1 | -1.1656000 | 1 | -.3402000 | 1 |
| S | .0000000 | 1 | .0000000 | 1 | .0000000 | 1 |
| O | -.4145000 | 1 | .8081000 | 1 | -1.0689000 | 1 |
| O | -.2728000 | 1 | -1.3684000 | 1 | -.0752000 | 1 |
| O | -.1571000 | 1 | .6177000 | 1 | 1.2524000 | 1 |
| N | 2.6966000 | 1 | 2.4252000 | 1 | .0000000 | 1 |
| C | 3.7883000 | 1 | 3.3564000 | 1 | -.1720000 | 1 |
| C | 1.3662000 | 1 | 3.0030000 | 1 | .1696000 | 1 |
| C | 2.6843000 | 1 | -2.2525000 | 1 | -.8642000 | 1 |
| C | 3.2318000 | 1 | -2.8007000 | 1 | -1.9719000 | 1 |
| C | 4.0098000 | 1 | -2.0692000 | 1 | -2.9148000 | 1 |
| N | 4.6311000 | 1 | -1.4720000 | 1 | -3.6964000 | 1 |
| C | 3.0230000 | 1 | -4.1748000 | 1 | -2.2868000 | 1 |
| N | 2.8531000 | 1 | -5.2959000 | 1 | -2.5443000 | 1 |
| H | 5.3938000 | 1 | 1.8842000 | 1 | .9644000 | 1 |
| H | 7.8602000 | 1 | 1.7243000 | 1 | 1.2860000 | 1 |
| H | 9.0837000 | 1 | -.3743000 | 1 | .5859000 | 1 |
| H | 7.7350000 | 1 | -2.2583000 | 1 | -.4304000 | 1 |
| H | 5.2764000 | 1 | -1.9719000 | 1 | -.7861000 | 1 |
| H | 3.4247000 | 1 | 4.2406000 | 1 | -.7645000 | 1 |
| H | 4.1433000 | 1 | 3.7152000 | 1 | .8320000 | 1 |
| H | 4.6333000 | 1 | 2.8794000 | 1 | -.7354000 | 1 |
| H | 1.4548000 | 1 | 4.1126000 | 1 | .2862000 | 1 |
| H | .7253000 | 1 | 2.7529000 | 1 | -.7269000 | 1 |
| H | .8714000 | 1 | 2.5585000 | 1 | 1.0835000 | 1 |
| H | 2.0031000 | 1 | -2.8569000 | 1 | -.2205000 | 1 |

*************************************************

AM1 PRECISE ISCF LET POLAR GRAD XYZ

C11

| C | 2.5737000 | 1 | 1.0095000 | 1 | -.0074000 | 1 |
| --- | --- | --- | --- | --- | --- | --- |
| C | 3.6146000 | 1 | .0388000 | 1 | .0534000 | 1 |
| C | 2.5404000 | 1 | -1.0397000 | 1 | .0713000 | 1 |
| C | 1.5165000 | 1 | -.1364000 | 1 | -.0073000 | 1 |
| N | 4.9819000 | 1 | -.0001000 | 1 | .0001000 | 1 |
| C | 5.6847000 | 1 | .9219000 | 1 | -.7496000 | 1 |
| C | 7.0789000 | 1 | .8987000 | 1 | -.8165000 | 1 |
| C | 7.7948000 | 1 | -.0897000 | 1 | -.1361000 | 1 |
| C | 7.0863000 | 1 | -1.0281000 | 1 | .6133000 | 1 |
| C | 5.6903000 | 1 | -.9634000 | 1 | .6854000 | 1 |
| C | -.0006000 | 1 | .0001000 | 1 | .0001000 | 1 |
| O | -.4340000 | 1 | .8021000 | 1 | .8669000 | 1 |
| O | -.6297000 | 1 | -.6369000 | 1 | -.8659000 | 1 |
| N | 2.4315000 | 1 | 2.3237000 | 1 | .0012000 | 1 |
| C | 3.5371000 | 1 | 3.2311000 | 1 | .1992000 | 1 |
| C | 1.1096000 | 1 | 2.9293000 | 1 | -.0734000 | 1 |
| N | 2.6749000 | 1 | -2.4721000 | 1 | .1200000 | 1 |
| O | 1.7072000 | 1 | -3.1725000 | 1 | .2010000 | 1 |
| O | 3.7938000 | 1 | -2.9414000 | 1 | .0883000 | 1 |
| H | 5.0868000 | 1 | 1.6620000 | 1 | -1.3137000 | 1 |
| H | 7.5945000 | 1 | 1.6578000 | 1 | -1.4250000 | 1 |
| H | 8.8934000 | 1 | -.1282000 | 1 | -.1950000 | 1 |
| H | 7.6024000 | 1 | -1.8308000 | 1 | 1.1640000 | 1 |
| H | 5.1027000 | 1 | -1.6976000 | 1 | 1.2756000 | 1 |
| H | 3.2185000 | 1 | 4.0498000 | 1 | .9008000 | 1 |
| H | 3.8313000 | 1 | 3.6899000 | 1 | -.7831000 | 1 |
| H | 4.4180000 | 1 | 2.7023000 | 1 | .6475000 | 1 |
| H | 1.2146000 | 1 | 3.9800000 | 1 | -.4473000 | 1 |
| H | .6277000 | 1 | 2.9126000 | 1 | .9446000 | 1 |
| H | .4508000 | 1 | 2.3365000 | 1 | -.7667000 | 1 |

*************************************************

AM1 PRECISE ISCF LET POLAR GRAD XYZ

C12

| C | 2.5515197 | 1 | 1.0646434 | 1 | -.0031615 | 1 |
| --- | --- | --- | --- | --- | --- | --- |
| C | 3.6023615 | 1 | .0664248 | 1 | -.0709001 | 1 |
| C | 2.5158496 | 1 | -.9923699 | 1 | -.1526318 | 1 |
| C | 1.5128669 | 1 | -.0651205 | 1 | -.0492447 | 1 |
| N | 4.9506826 | 1 | -.0002197 | 1 | .0001760 | 1 |
| C | 5.7072797 | 1 | .9880274 | 1 | .6040007 | 1 |
| C | 7.1011960 | 1 | .9184691 | 1 | .6522766 | 1 |
| C | 7.7689701 | 1 | -.1825044 | 1 | .1184895 | 1 |
| C | 7.0087541 | 1 | -1.2019357 | 1 | -.4603680 | 1 |
| C | 5.6205673 | 1 | -1.0984938 | 1 | -.5200307 | 1 |
| C | 2.6467753 | 1 | -2.4088941 | 1 | -.1992335 | 1 |
| C | 1.8786334 | 1 | -3.2653374 | 1 | -.9117034 | 1 |
| C | .8459444 | 1 | -2.8746844 | 1 | -1.8079670 | 1 |
| N | .0040858 | 1 | -2.5723380 | 1 | -2.5511430 | 1 |
| C | 2.0975706 | 1 | -4.6728947 | 1 | -.8132376 | 1 |
| N | 2.2729066 | 1 | -5.8199113 | 1 | -.7326061 | 1 |
| C | -.0000374 | 1 | -.0002821 | 1 | .0001527 | 1 |
| O | -.5175733 | 1 | 1.0430132 | 1 | -.4782542 | 1 |
| O | -.5838645 | 1 | -.9746400 | 1 | .5229282 | 1 |
| N | 2.4500323 | 1 | 2.3773091 | 1 | .0001610 | 1 |
| C | 3.5740477 | 1 | 3.2559784 | 1 | -.2349085 | 1 |
| C | 1.1584384 | 1 | 3.0355013 | 1 | .1541843 | 1 |
| H | 5.1556995 | 1 | 1.8137794 | 1 | 1.0836314 | 1 |
| H | 7.6526125 | 1 | 1.7410430 | 1 | 1.1334881 | 1 |
| H | 8.8655099 | 1 | -.2514560 | 1 | .1575738 | 1 |
| H | 7.4889367 | 1 | -2.0970180 | 1 | -.8863759 | 1 |
| H | 4.9921605 | 1 | -1.8749691 | 1 | -.9941458 | 1 |
| H | 3.4512964 | 1 | -2.8204454 | 1 | .4430617 | 1 |
| H | 3.2343163 | 1 | 4.1183802 | 1 | -.8716004 | 1 |
| H | 3.9554825 | 1 | 3.6572512 | 1 | .7430168 | 1 |
| H | 4.3969329 | 1 | 2.7199292 | 1 | -.7763511 | 1 |
| H | 1.3273998 | 1 | 4.0800631 | 1 | .5222796 | 1 |
| H | .6158180 | 1 | 3.0395884 | 1 | -.8324390 | 1 |
| H | .5181455 | 1 | 2.4625452 | 1 | .8824381 | 1 |

*************************************************

AM1 PRECISE ISCF LET POLAR GRAD XYZ

C13

| C | 3.0089000 | 1 | .9541000 | 1 | -.0200000 | 1 |
| --- | --- | --- | --- | --- | --- | --- |
| C | 4.0177000 | 1 | -.0225000 | 1 | -.0270000 | 1 |
| C | 2.8939000 | 1 | -1.0656000 | 1 | -.0383000 | 1 |
| C | 1.9062000 | 1 | -.1206000 | 1 | -.0357000 | 1 |
| N | 5.3940000 | 1 | .0000000 | 1 | -.0001000 | 1 |
| C | 6.0369000 | 1 | 1.1871000 | 1 | .2959000 | 1 |
| C | 7.4295000 | 1 | 1.2754000 | 1 | .3213000 | 1 |
| C | 8.2052000 | 1 | .1447000 | 1 | .0515000 | 1 |
| C | 7.5556000 | 1 | -1.0521000 | 1 | -.2478000 | 1 |
| C | 6.1566000 | 1 | -1.1081000 | 1 | -.2810000 | 1 |
| S | -.0002000 | 1 | .0000000 | 1 | -.0001000 | 1 |
| O | -.1016000 | 1 | 1.3855000 | 1 | .1582000 | 1 |
| O | -.3292000 | 1 | -.4858000 | 1 | -1.2527000 | 1 |
| O | 3.1396000 | 1 | 2.2637000 | 1 | -.0002000 | 1 |
| C | 1.9436000 | 1 | 3.0896000 | 1 | -.0223000 | 1 |
| N | 2.9379000 | 1 | -2.5107000 | 1 | -.0123000 | 1 |
| O | 1.9438000 | 1 | -3.1423000 | 1 | -.2200000 | 1 |
| O | 3.9978000 | 1 | -3.0507000 | 1 | .2193000 | 1 |
| O | -.2944000 | 1 | -.7632000 | 1 | 1.1152000 | 1 |
| H | 5.3925000 | 1 | 2.0637000 | 1 | .5113000 | 1 |
| H | 7.8947000 | 1 | 2.2447000 | 1 | .5607000 | 1 |
| H | 9.3050000 | 1 | .1994000 | 1 | .0741000 | 1 |
| H | 8.1201000 | 1 | -1.9734000 | 1 | -.4668000 | 1 |
| H | 5.6262000 | 1 | -2.0534000 | 1 | -.5254000 | 1 |
| H | 1.3627000 | 1 | 2.9256000 | 1 | .9182000 | 1 |
| H | 2.3755000 | 1 | 4.1181000 | 1 | -.0883000 | 1 |
| H | 1.3192000 | 1 | 2.8306000 | 1 | -.9110000 | 1 |

*************************************************

AM1 PRECISE ISCF LET POLAR GRAD XYZ

C14

| C | 1.8122000 | 1 | -.1583000 | 1 | -.0364000 | 1 |
| --- | --- | --- | --- | --- | --- | --- |
| C | 2.8571000 | 1 | .9377000 | 1 | -.0147000 | 1 |
| C | 3.9052000 | 1 | -.0190000 | 1 | -.0088000 | 1 |
| C | 2.8111000 | 1 | -1.0904000 | 1 | -.0356000 | 1 |
| N | 5.2664000 | 1 | .0000000 | 1 | .0000000 | 1 |
| C | 5.9499000 | 1 | 1.1998000 | 1 | .0365000 | 1 |
| C | 7.3461000 | 1 | 1.2374000 | 1 | .0511000 | 1 |
| C | 8.0796000 | 1 | .0500000 | 1 | .0279000 | 1 |
| C | 7.3880000 | 1 | -1.1623000 | 1 | -.0102000 | 1 |
| C | 5.9916000 | 1 | -1.1735000 | 1 | -.0233000 | 1 |
| O | 2.8967000 | 1 | 2.2460000 | 1 | .0000000 | 1 |
| C | 1.6130000 | 1 | 2.9446000 | 1 | -.0047000 | 1 |
| S | .0000000 | 1 | .0000000 | 1 | .0000000 | 1 |
| O | -.1572000 | 1 | .7247000 | 1 | 1.1938000 | 1 |
| O | -.4472000 | 1 | -1.3162000 | 1 | -.0173000 | 1 |
| O | -.2133000 | 1 | .7868000 | 1 | -1.1420000 | 1 |
| C | 2.9241000 | 1 | -2.5151000 | 1 | .0272000 | 1 |
| C | 2.6958000 | 1 | -3.3684000 | 1 | -.9933000 | 1 |
| C | 2.8283000 | 1 | -4.7762000 | 1 | -.8013000 | 1 |
| N | 2.9367000 | 1 | -5.9233000 | 1 | -.6437000 | 1 |
| C | 2.3367000 | 1 | -2.9594000 | 1 | -2.3089000 | 1 |
| N | 2.0452000 | 1 | -2.6347000 | 1 | -3.3868000 | 1 |
| H | 5.3332000 | 1 | 2.1200000 | 1 | .0520000 | 1 |
| H | 7.8468000 | 1 | 2.2183000 | 1 | .0806000 | 1 |
| H | 9.1799000 | 1 | .0694000 | 1 | .0387000 | 1 |
| H | 7.9234000 | 1 | -2.1248000 | 1 | -.0318000 | 1 |
| H | 5.4089000 | 1 | -2.1137000 | 1 | -.0552000 | 1 |
| H | 1.9307000 | 1 | 4.0145000 | 1 | .0204000 | 1 |
| H | 1.0548000 | 1 | 2.6784000 | 1 | -.9399000 | 1 |
| H | 1.0279000 | 1 | 2.6444000 | 1 | .9029000 | 1 |
| H | 3.1942000 | 1 | -2.9105000 | 1 | 1.0284000 | 1 |

*************************************************

AM1 PRECISE ISCF LET POLAR GRAD XYZ

C15

| C | 2.6165000 | 1 | .9506000 | 1 | -.0284000 | 1 |
| --- | --- | --- | --- | --- | --- | --- |
| C | 3.6245000 | 1 | -.0229000 | 1 | -.0408000 | 1 |
| C | 2.5108000 | 1 | -1.0823000 | 1 | -.0721000 | 1 |
| C | 1.5199000 | 1 | -.1372000 | 1 | -.0515000 | 1 |
| N | 5.0005000 | 1 | .0000000 | 1 | .0001000 | 1 |
| C | 5.6437000 | 1 | 1.2125000 | 1 | .1651000 | 1 |
| C | 7.0357000 | 1 | 1.2972000 | 1 | .2156000 | 1 |
| C | 7.8109000 | 1 | .1400000 | 1 | .1005000 | 1 |
| C | 7.1613000 | 1 | -1.0815000 | 1 | -.0719000 | 1 |
| C | 5.7632000 | 1 | -1.1364000 | 1 | -.1269000 | 1 |
| C | -.0001000 | 1 | .0000000 | 1 | .0001000 | 1 |
| O | -.4333000 | 1 | 1.1235000 | 1 | -.3593000 | 1 |
| O | -.6270000 | 1 | -.9926000 | 1 | .4153000 | 1 |
| O | 2.7104000 | 1 | 2.2644000 | 1 | .0001000 | 1 |
| C | 1.4703000 | 1 | 3.0252000 | 1 | -.0355000 | 1 |
| N | 2.5696000 | 1 | -2.5228000 | 1 | -.0890000 | 1 |
| O | 1.6814000 | 1 | -3.1547000 | 1 | -.5805000 | 1 |
| O | 3.5467000 | 1 | -3.0640000 | 1 | .3840000 | 1 |
| H | 5.0006000 | 1 | 2.1115000 | 1 | .2563000 | 1 |
| H | 7.5011000 | 1 | 2.2865000 | 1 | .3498000 | 1 |
| H | 8.9100000 | 1 | .1934000 | 1 | .1446000 | 1 |
| H | 7.7249000 | 1 | -2.0239000 | 1 | -.1682000 | 1 |
| H | 5.2359000 | 1 | -2.1048000 | 1 | -.2597000 | 1 |
| H | .8173000 | 1 | 2.7180000 | 1 | .8172000 | 1 |
| H | 1.8391000 | 1 | 4.0758000 | 1 | .0560000 | 1 |
| H | .9461000 | 1 | 2.8288000 | 1 | -1.0033000 | 1 |

*************************************************

AM1 PRECISE ISCF LET POLAR GRAD XYZ

C16

| C | 2.5765000 | 1 | .9874000 | 1 | -.0233000 | 1 |
| --- | --- | --- | --- | --- | --- | --- |
| C | 1.5112000 | 1 | -.1072000 | 1 | -.0680000 | 1 |
| C | 2.4972000 | 1 | -1.0553000 | 1 | -.0986000 | 1 |
| C | 3.6014000 | 1 | .0087000 | 1 | -.0313000 | 1 |
| N | 4.9631000 | 1 | .0000000 | 1 | .0000000 | 1 |
| C | 5.6712000 | 1 | 1.1841000 | 1 | .0745000 | 1 |
| C | 7.0668000 | 1 | 1.1919000 | 1 | .1245000 | 1 |
| C | 7.7758000 | 1 | -.0103000 | 1 | .0990000 | 1 |
| C | 7.0603000 | 1 | -1.2066000 | 1 | .0186000 | 1 |
| C | 5.6648000 | 1 | -1.1879000 | 1 | -.0305000 | 1 |
| C | .0000000 | 1 | .0000000 | 1 | .0000000 | 1 |
| O | -.4535000 | 1 | 1.1747000 | 1 | -.0034000 | 1 |
| O | -.6355000 | 1 | -1.0730000 | 1 | .0683000 | 1 |
| O | 2.6785000 | 1 | 2.2938000 | 1 | .0000000 | 1 |
| C | 1.4483000 | 1 | 3.0756000 | 1 | -.0294000 | 1 |
| C | 2.5904000 | 1 | -2.4799000 | 1 | -.1181000 | 1 |
| C | 2.1975000 | 1 | -3.2668000 | 1 | -1.1439000 | 1 |
| C | 1.6921000 | 1 | -2.7624000 | 1 | -2.3758000 | 1 |
| N | 1.2894000 | 1 | -2.3524000 | 1 | -3.3868000 | 1 |
| C | 2.2963000 | 1 | -4.6871000 | 1 | -1.0514000 | 1 |
| N | 2.3756000 | 1 | -5.8446000 | 1 | -.9761000 | 1 |
| H | 5.0742000 | 1 | 2.1169000 | 1 | .0918000 | 1 |
| H | 7.5871000 | 1 | 2.1610000 | 1 | .1838000 | 1 |
| H | 8.8758000 | 1 | -.0154000 | 1 | .1412000 | 1 |
| H | 7.5764000 | 1 | -2.1795000 | 1 | -.0082000 | 1 |
| H | 5.0634000 | 1 | -2.1145000 | 1 | -.0984000 | 1 |
| H | .8522000 | 1 | 2.8538000 | 1 | .8899000 | 1 |
| H | 1.8396000 | 1 | 4.1212000 | 1 | -.0577000 | 1 |
| H | .8547000 | 1 | 2.8023000 | 1 | -.9365000 | 1 |
| H | 2.9908000 | 1 | -2.9399000 | 1 | .8073000 | 1 |

*************************************************

AM1 PRECISE ISCF LET POLAR GRAD XYZ

B1

| C | 2.6100000 | 1 | 1.3831000 | 1 | -.0418000 | 1 |
| --- | --- | --- | --- | --- | --- | --- |
| C | 4.0413000 | 1 | 1.2615000 | 1 | .0420000 | 1 |
| C | 4.6981000 | 1 | .0445000 | 1 | -.1198000 | 1 |
| C | 3.9231000 | 1 | -1.1205000 | 1 | -.3649000 | 1 |
| C | 2.5144000 | 1 | -1.0057000 | 1 | -.3530000 | 1 |
| C | 1.8563000 | 1 | .1932000 | 1 | -.1801000 | 1 |
| N | 6.1863000 | 1 | .0000000 | 1 | .0000000 | 1 |
| C | 6.7476000 | 1 | 1.3201000 | 1 | .4393000 | 1 |
| C | 6.8059000 | 1 | -.3268000 | 1 | -1.3307000 | 1 |
| C | 6.5734000 | 1 | -.9943000 | 1 | 1.0581000 | 1 |
| S | .0000000 | 1 | .0000000 | 1 | .0000000 | 1 |
| O | -.2779000 | 1 | .8292000 | 1 | 1.0912000 | 1 |
| O | -.4838000 | 1 | .4512000 | 1 | -1.2311000 | 1 |
| N | 2.0729000 | 1 | 2.6498000 | 1 | .0000000 | 1 |
| C | 2.6960000 | 1 | 3.6704000 | 1 | .7990000 | 1 |
| C | .7800000 | 1 | 2.9743000 | 1 | -.5481000 | 1 |
| N | 4.4641000 | 1 | -2.4696000 | 1 | -.6232000 | 1 |
| O | 3.7944000 | 1 | -3.4282000 | 1 | -.3651000 | 1 |
| O | 5.5687000 | 1 | -2.5986000 | 1 | -1.1055000 | 1 |
| O | -.1169000 | 1 | -1.3739000 | 1 | .2292000 | 1 |
| H | 4.5994000 | 1 | 2.1938000 | 1 | .2195000 | 1 |
| H | 1.9013000 | 1 | -1.9347000 | 1 | -.4542000 | 1 |
| H | 7.8618000 | 1 | 1.2183000 | 1 | .5372000 | 1 |
| H | 6.5251000 | 1 | 2.1088000 | 1 | -.3266000 | 1 |
| H | 6.3080000 | 1 | 1.6047000 | 1 | 1.4312000 | 1 |
| H | 7.3782000 | 1 | .5575000 | 1 | -1.7173000 | 1 |
| H | 7.4952000 | 1 | -1.2061000 | 1 | -1.2255000 | 1 |
| H | 6.0050000 | 1 | -.5889000 | 1 | -2.0745000 | 1 |
| H | 7.5417000 | 1 | -.6836000 | 1 | 1.5307000 | 1 |
| H | 5.7677000 | 1 | -1.0284000 | 1 | 1.8395000 | 1 |
| H | 6.7179000 | 1 | -2.0174000 | 1 | .6178000 | 1 |
| H | 1.9094000 | 1 | 4.3655000 | 1 | 1.2005000 | 1 |
| H | 3.2470000 | 1 | 3.2271000 | 1 | 1.6711000 | 1 |
| H | 3.4168000 | 1 | 4.2672000 | 1 | .1757000 | 1 |
| H | .8045000 | 1 | 4.0450000 | 1 | -.8862000 | 1 |
| H | .5565000 | 1 | 2.3189000 | 1 | -1.4351000 | 1 |
| H | -.0323000 | 1 | 2.8447000 | 1 | .2212000 | 1 |

*************************************************

AM1 PRECISE ISCF LET POLAR GRAD XYZ

B2

| C | 2.6165000 | 1 | 1.3240000 | 1 | .0316000 | 1 |
| --- | --- | --- | --- | --- | --- | --- |
| C | 4.0331000 | 1 | 1.2551000 | 1 | .0027000 | 1 |
| C | 4.7035000 | 1 | .0235000 | 1 | -.0157000 | 1 |
| C | 3.9599000 | 1 | -1.1745000 | 1 | -.0437000 | 1 |
| C | 2.5584000 | 1 | -1.0820000 | 1 | -.0174000 | 1 |
| C | 1.8799000 | 1 | .1241000 | 1 | .0265000 | 1 |
| N | 6.1951000 | 1 | .0000000 | 1 | .0000000 | 1 |
| C | 6.7758000 | 1 | 1.3604000 | 1 | .2319000 | 1 |
| C | 6.6811000 | 1 | -.8868000 | 1 | 1.1034000 | 1 |
| C | 6.7086000 | 1 | -.4886000 | 1 | -1.3159000 | 1 |
| S | .0000000 | 1 | .0000000 | 1 | .0000000 | 1 |
| O | -.3568000 | 1 | .6151000 | 1 | 1.2037000 | 1 |
| O | -.1608000 | 1 | -1.3933000 | 1 | -.0157000 | 1 |
| O | -.3577000 | 1 | .6545000 | 1 | -1.1739000 | 1 |
| N | 1.9545000 | 1 | 2.5733000 | 1 | .0000000 | 1 |
| C | 1.3797000 | 1 | 3.0447000 | 1 | 1.2380000 | 1 |
| C | 2.5714000 | 1 | 3.6021000 | 1 | -.7968000 | 1 |
| C | 4.5030000 | 1 | -2.5283000 | 1 | -.0339000 | 1 |
| C | 4.6859000 | 1 | -3.3146000 | 1 | -1.1165000 | 1 |
| C | 5.1403000 | 1 | -4.6586000 | 1 | -.9671000 | 1 |
| N | 5.5092000 | 1 | -5.7543000 | 1 | -.8416000 | 1 |
| C | 4.4615000 | 1 | -2.8900000 | 1 | -2.4580000 | 1 |
| N | 4.2842000 | 1 | -2.5512000 | 1 | -3.5564000 | 1 |
| H | 4.5791000 | 1 | 2.2111000 | 1 | -.0041000 | 1 |
| H | 1.9592000 | 1 | -2.0189000 | 1 | -.0412000 | 1 |
| H | 7.8929000 | 1 | 1.2726000 | 1 | .2981000 | 1 |
| H | 6.5172000 | 1 | 2.0341000 | 1 | -.6275000 | 1 |
| H | 6.3731000 | 1 | 1.7798000 | 1 | 1.1910000 | 1 |
| H | 7.7500000 | 1 | -.6421000 | 1 | 1.3410000 | 1 |
| H | 6.0407000 | 1 | -.7248000 | 1 | 2.0109000 | 1 |
| H | 6.6245000 | 1 | -1.9610000 | 1 | .7869000 | 1 |
| H | 6.3283000 | 1 | .1847000 | 1 | -2.1296000 | 1 |
| H | 7.8294000 | 1 | -.4838000 | 1 | -1.3000000 | 1 |
| H | 6.3358000 | 1 | -1.5307000 | 1 | -1.5014000 | 1 |
| H | .5939000 | 1 | 3.8049000 | 1 | .9840000 | 1 |
| H | 2.1526000 | 1 | 3.5287000 | 1 | 1.8980000 | 1 |
| H | .8911000 | 1 | 2.1971000 | 1 | 1.7934000 | 1 |
| H | 3.4141000 | 1 | 4.1294000 | 1 | -.2675000 | 1 |
| H | 1.7808000 | 1 | 4.3604000 | 1 | -1.0444000 | 1 |
| H | 2.9605000 | 1 | 3.1637000 | 1 | -1.7523000 | 1 |
| H | 4.6723000 | 1 | -2.9525000 | 1 | .9766000 | 1 |

*************************************************

AM1 PRECISE ISCF LET POLAR GRAD XYZ

B3

| C | 2.2616000 | 1 | 1.3145000 | 1 | .0217000 | 1 |
| --- | --- | --- | --- | --- | --- | --- |
| C | 3.6869000 | 1 | 1.2190000 | 1 | -.0501000 | 1 |
| C | 4.3681000 | 1 | .0059000 | 1 | .0977000 | 1 |
| C | 3.6192000 | 1 | -1.1704000 | 1 | .3573000 | 1 |
| C | 2.2074000 | 1 | -1.0840000 | 1 | .3805000 | 1 |
| C | 1.5326000 | 1 | .0991000 | 1 | .1684000 | 1 |
| N | 5.8570000 | 1 | .0000000 | 1 | .0000000 | 1 |
| C | 6.4169000 | 1 | 1.3866000 | 1 | -.1299000 | 1 |
| C | 6.2887000 | 1 | -.7575000 | 1 | -1.2245000 | 1 |
| C | 6.4502000 | 1 | -.5792000 | 1 | 1.2534000 | 1 |
| C | .0000000 | 1 | .0000000 | 1 | .0000000 | 1 |
| O | -.6610000 | 1 | -.3291000 | 1 | 1.0118000 | 1 |
| O | -.4293000 | 1 | .2469000 | 1 | -1.1545000 | 1 |
| N | 1.6584000 | 1 | 2.5513000 | 1 | .0000000 | 1 |
| C | 2.3543000 | 1 | 3.6833000 | 1 | -.5461000 | 1 |
| C | .2504000 | 1 | 2.7182000 | 1 | .2730000 | 1 |
| N | 4.1804000 | 1 | -2.5174000 | 1 | .5928000 | 1 |
| O | 5.2452000 | 1 | -2.8292000 | 1 | .1050000 | 1 |
| O | 3.5597000 | 1 | -3.2987000 | 1 | 1.2557000 | 1 |
| H | 4.2336000 | 1 | 2.1585000 | 1 | -.2204000 | 1 |
| H | 1.6035000 | 1 | -1.9967000 | 1 | .5632000 | 1 |
| H | 7.5347000 | 1 | 1.3098000 | 1 | -.2072000 | 1 |
| H | 6.0257000 | 1 | 1.8778000 | 1 | -1.0600000 | 1 |
| H | 6.1414000 | 1 | 1.9908000 | 1 | .7741000 | 1 |
| H | 7.1992000 | 1 | -1.3660000 | 1 | -.9857000 | 1 |
| H | 5.4711000 | 1 | -1.4471000 | 1 | -1.5704000 | 1 |
| H | 6.5149000 | 1 | -.0382000 | 1 | -2.0553000 | 1 |
| H | 7.4014000 | 1 | -.0412000 | 1 | 1.5089000 | 1 |
| H | 5.7192000 | 1 | -.4595000 | 1 | 2.0964000 | 1 |
| H | 6.6958000 | 1 | -1.6669000 | 1 | 1.1159000 | 1 |
| H | 1.6250000 | 1 | 4.4991000 | 1 | -.7978000 | 1 |
| H | 3.0906000 | 1 | 4.0815000 | 1 | .2052000 | 1 |
| H | 2.9069000 | 1 | 3.4105000 | 1 | -1.4859000 | 1 |
| H | .0649000 | 1 | 3.7876000 | 1 | .5595000 | 1 |
| H | -.3708000 | 1 | 2.4499000 | 1 | -.6275000 | 1 |
| H | -.0553000 | 1 | 2.0568000 | 1 | 1.1304000 | 1 |

*************************************************

AM1 PRECISE ISCF LET POLAR GRAD XYZ

B4

| C | 2.2552000 | 1 | 1.3183000 | 1 | .0142000 | 1 |
| --- | --- | --- | --- | --- | --- | --- |
| C | 3.6713000 | 1 | 1.2430000 | 1 | -.0264000 | 1 |
| C | 4.3482000 | 1 | .0182000 | 1 | .0972000 | 1 |
| C | 3.6204000 | 1 | -1.1671000 | 1 | .3218000 | 1 |
| C | 2.2176000 | 1 | -1.0821000 | 1 | .3517000 | 1 |
| C | 1.5309000 | 1 | .1054000 | 1 | .1574000 | 1 |
| N | 5.8357000 | 1 | -.0001000 | 1 | .0003000 | 1 |
| C | 6.3944000 | 1 | 1.3381000 | 1 | -.3725000 | 1 |
| C | 6.4244000 | 1 | -.3768000 | 1 | 1.3228000 | 1 |
| C | 6.2700000 | 1 | -.9701000 | 1 | -1.0525000 | 1 |
| C | .0001000 | 1 | .0013000 | 1 | .0002000 | 1 |
| O | -.4455000 | 1 | .2909000 | 1 | -1.1387000 | 1 |
| O | -.6481000 | 1 | -.3896000 | 1 | .9985000 | 1 |
| N | 1.6597000 | 1 | 2.5842000 | 1 | -.0001000 | 1 |
| C | 2.0731000 | 1 | 3.5106000 | 1 | -1.0267000 | 1 |
| C | .2808000 | 1 | 2.7267000 | 1 | .4079000 | 1 |
| C | 4.1648000 | 1 | -2.5152000 | 1 | .4398000 | 1 |
| C | 4.3733000 | 1 | -3.1807000 | 1 | 1.5968000 | 1 |
| C | 4.8062000 | 1 | -4.5398000 | 1 | 1.5892000 | 1 |
| N | 5.1542000 | 1 | -5.6496000 | 1 | 1.5827000 | 1 |
| C | 4.1903000 | 1 | -2.6034000 | 1 | 2.8860000 | 1 |
| N | 4.0456000 | 1 | -2.1383000 | 1 | 3.9420000 | 1 |
| H | 4.2152000 | 1 | 2.1931000 | 1 | -.1427000 | 1 |
| H | 1.6237000 | 1 | -2.0006000 | 1 | .5139000 | 1 |
| H | 7.5077000 | 1 | 1.2486000 | 1 | -.4834000 | 1 |
| H | 5.9458000 | 1 | 1.6724000 | 1 | -1.3445000 | 1 |
| H | 6.1695000 | 1 | 2.0814000 | 1 | .4375000 | 1 |
| H | 7.5425000 | 1 | -.3603000 | 1 | 1.2465000 | 1 |
| H | 6.0755000 | 1 | .3564000 | 1 | 2.0982000 | 1 |
| H | 6.0784000 | 1 | -1.4050000 | 1 | 1.6111000 | 1 |
| H | 7.3446000 | 1 | -.7831000 | 1 | -1.3150000 | 1 |
| H | 6.1734000 | 1 | -2.0199000 | 1 | -.6719000 | 1 |
| H | 5.6242000 | 1 | -.8359000 | 1 | -1.9603000 | 1 |
| H | 1.2258000 | 1 | 3.7376000 | 1 | -1.7310000 | 1 |
| H | 2.3922000 | 1 | 4.4670000 | 1 | -.5320000 | 1 |
| H | 2.9287000 | 1 | 3.1124000 | 1 | -1.6319000 | 1 |
| H | .1327000 | 1 | 3.7968000 | 1 | .7129000 | 1 |
| H | -.4396000 | 1 | 2.4684000 | 1 | -.4184000 | 1 |
| H | .0712000 | 1 | 2.0576000 | 1 | 1.2857000 | 1 |
| H | 4.3051000 | 1 | -3.0479000 | 1 | -.5223000 | 1 |

*************************************************

AM1 PRECISE ISCF LET POLAR GRAD XYZ

B5

| C | 2.6743000 | 1 | 1.2855000 | 1 | -.0814000 | 1 |
| --- | --- | --- | --- | --- | --- | --- |
| C | 4.0898000 | 1 | 1.2310000 | 1 | -.0699000 | 1 |
| C | 4.7650000 | 1 | .0108000 | 1 | -.0007000 | 1 |
| C | 3.9821000 | 1 | -1.1789000 | 1 | .0516000 | 1 |
| C | 2.5804000 | 1 | -1.0948000 | 1 | .0043000 | 1 |
| C | 1.9106000 | 1 | .1252000 | 1 | -.0502000 | 1 |
| N | 6.2537000 | 1 | .0000000 | 1 | -.0003000 | 1 |
| C | 6.8029000 | 1 | 1.3634000 | 1 | -.3078000 | 1 |
| C | 6.7680000 | 1 | -.9110000 | 1 | -1.0782000 | 1 |
| C | 6.7667000 | 1 | -.4007000 | 1 | 1.3553000 | 1 |
| S | .0010000 | 1 | .0001000 | 1 | .0003000 | 1 |
| O | -.3484000 | 1 | .6504000 | 1 | -1.1826000 | 1 |
| O | -.1512000 | 1 | -1.3870000 | 1 | .0021000 | 1 |
| O | -.3096000 | 1 | .6530000 | 1 | 1.1843000 | 1 |
| O | 2.1625000 | 1 | 2.5643000 | 1 | .0001000 | 1 |
| C | 1.5368000 | 1 | 3.0584000 | 1 | -1.1910000 | 1 |
| N | 4.5519000 | 1 | -2.5446000 | 1 | .1783000 | 1 |
| O | 5.5652000 | 1 | -2.7126000 | 1 | .8182000 | 1 |
| O | 3.9908000 | 1 | -3.4599000 | 1 | -.3493000 | 1 |
| H | 4.5955000 | 1 | 2.2090000 | 1 | -.1014000 | 1 |
| H | 1.9673000 | 1 | -2.0280000 | 1 | .0235000 | 1 |
| H | 7.9238000 | 1 | 1.2997000 | 1 | -.3303000 | 1 |
| H | 6.4226000 | 1 | 1.7030000 | 1 | -1.3068000 | 1 |
| H | 6.5019000 | 1 | 2.0927000 | 1 | .4905000 | 1 |
| H | 7.7666000 | 1 | -.5431000 | 1 | -1.4355000 | 1 |
| H | 6.9122000 | 1 | -1.9558000 | 1 | -.6917000 | 1 |
| H | 6.0428000 | 1 | -.9143000 | 1 | -1.9344000 | 1 |
| H | 7.1847000 | 1 | .4946000 | 1 | 1.8862000 | 1 |
| H | 5.9312000 | 1 | -.8284000 | 1 | 1.9746000 | 1 |
| H | 7.5634000 | 1 | -1.1821000 | 1 | 1.2425000 | 1 |
| H | 1.0099000 | 1 | 3.9788000 | 1 | -.8337000 | 1 |
| H | 2.3329000 | 1 | 3.3160000 | 1 | -1.9320000 | 1 |
| H | .8088000 | 1 | 2.3242000 | 1 | -1.6175000 | 1 |

*************************************************

AM1 PRECISE ISCF LET POLAR GRAD XYZ

B6

| C | 2.5370000 | 1 | -1.0057000 | 1 | .1902000 | 1 |
| --- | --- | --- | --- | --- | --- | --- |
| C | 3.9365000 | 1 | -1.1288000 | 1 | .1794000 | 1 |
| C | 4.7051000 | 1 | .0483000 | 1 | .0601000 | 1 |
| C | 4.0633000 | 1 | 1.2873000 | 1 | .0186000 | 1 |
| N | 6.1941000 | 1 | .0000000 | 1 | .0000000 | 1 |
| C | 4.4611000 | 1 | -2.4885000 | 1 | .2237000 | 1 |
| C | 1.8657000 | 1 | .2078000 | 1 | .0949000 | 1 |
| C | 2.6445000 | 1 | 1.3694000 | 1 | .0465000 | 1 |
| S | .0000000 | 1 | .0000000 | 1 | .0000000 | 1 |
| C | 4.6790000 | 1 | -3.2101000 | 1 | 1.3443000 | 1 |
| C | 4.4883000 | 1 | -2.7046000 | 1 | 2.6623000 | 1 |
| C | 5.1298000 | 1 | -4.5614000 | 1 | 1.2671000 | 1 |
| C | 6.7691000 | 1 | 1.3069000 | 1 | -.4519000 | 1 |
| C | 6.7311000 | 1 | -.2949000 | 1 | 1.3640000 | 1 |
| C | 6.6475000 | 1 | -1.0485000 | 1 | -.9661000 | 1 |
| O | 2.2509000 | 1 | 2.6773000 | 1 | .0000000 | 1 |
| C | .8755000 | 1 | 3.0170000 | 1 | .1955000 | 1 |
| H | 4.5937000 | 1 | 2.2494000 | 1 | -.0376000 | 1 |
| H | 1.9336000 | 1 | -1.9383000 | 1 | .2574000 | 1 |
| H | 7.8784000 | 1 | 1.1930000 | 1 | -.5793000 | 1 |
| H | 6.3002000 | 1 | 1.6004000 | 1 | -1.4281000 | 1 |
| H | 6.5756000 | 1 | 2.0960000 | 1 | .3222000 | 1 |
| H | 7.8496000 | 1 | -.3442000 | 1 | 1.3171000 | 1 |
| H | 6.4064000 | 1 | .5164000 | 1 | 2.0687000 | 1 |
| H | 6.3164000 | 1 | -1.2756000 | 1 | 1.7209000 | 1 |
| H | 5.9566000 | 1 | -1.0559000 | 1 | -1.8508000 | 1 |
| H | 7.6941000 | 1 | -.8248000 | 1 | -1.3039000 | 1 |
| H | 6.6446000 | 1 | -2.0549000 | 1 | -.4706000 | 1 |
| O | -.3130000 | 1 | .6854000 | 1 | -1.1769000 | 1 |
| O | -.4364000 | 1 | .6040000 | 1 | 1.1808000 | 1 |
| O | -.1299000 | 1 | -1.3919000 | 1 | -.0570000 | 1 |
| H | .9151000 | 1 | 4.1339000 | 1 | .2739000 | 1 |
| H | .4813000 | 1 | 2.5620000 | 1 | 1.1384000 | 1 |
| H | .2728000 | 1 | 2.7004000 | 1 | -.6930000 | 1 |
| H | 4.5957000 | 1 | -2.9698000 | 1 | -.7660000 | 1 |
| N | 4.3332000 | 1 | -2.3003000 | 1 | 3.7417000 | 1 |
| N | 5.4972000 | 1 | -5.6628000 | 1 | 1.2041000 | 1 |

*************************************************

AM1 PRECISE ISCF LET POLAR GRAD XYZ

B7

| C | 2.2303000 | 1 | -1.1434000 | 1 | -.0761000 | 1 |
| --- | --- | --- | --- | --- | --- | --- |
| C | 3.6381000 | 1 | -1.2133000 | 1 | -.0983000 | 1 |
| C | 4.4021000 | 1 | -.0140000 | 1 | -.0425000 | 1 |
| C | 3.7132000 | 1 | 1.2025000 | 1 | -.0098000 | 1 |
| N | 5.8901000 | 1 | .0000000 | 1 | .0000000 | 1 |
| N | 4.2117000 | 1 | -2.5774000 | 1 | -.1832000 | 1 |
| C | 1.5473000 | 1 | .0662000 | 1 | -.0329000 | 1 |
| C | 2.2973000 | 1 | 1.2505000 | 1 | -.0161000 | 1 |
| C | .0000000 | 1 | .0000000 | 1 | .0000000 | 1 |
| C | 6.4133000 | 1 | 1.3917000 | 1 | .2135000 | 1 |
| C | 6.3765000 | 1 | -.8111000 | 1 | 1.1659000 | 1 |
| C | 6.4568000 | 1 | -.4993000 | 1 | -1.3001000 | 1 |
| O | 1.8243000 | 1 | 2.5314000 | 1 | .0000000 | 1 |
| C | .4038000 | 1 | 2.7300000 | 1 | -.0240000 | 1 |
| H | 4.2082000 | 1 | 2.1857000 | 1 | .0251000 | 1 |
| H | 1.6312000 | 1 | -2.0769000 | 1 | -.0955000 | 1 |
| H | 7.5344000 | 1 | 1.3484000 | 1 | .2616000 | 1 |
| H | 6.1140000 | 1 | 2.0499000 | 1 | -.6448000 | 1 |
| H | 6.0123000 | 1 | 1.8004000 | 1 | 1.1781000 | 1 |
| H | 7.4003000 | 1 | -.4589000 | 1 | 1.4625000 | 1 |
| H | 5.6670000 | 1 | -.6763000 | 1 | 2.0249000 | 1 |
| H | 6.4529000 | 1 | -1.8988000 | 1 | .9003000 | 1 |
| H | 5.6229000 | 1 | -.8192000 | 1 | -1.9824000 | 1 |
| H | 7.1224000 | 1 | -1.3841000 | 1 | -1.1133000 | 1 |
| H | 7.0457000 | 1 | .3130000 | 1 | -1.8018000 | 1 |
| O | -.5209000 | 1 | .0376000 | 1 | 1.1388000 | 1 |
| O | -.5646000 | 1 | -.0879000 | 1 | -1.1144000 | 1 |
| H | .3196000 | 1 | 3.8457000 | 1 | -.0608000 | 1 |
| H | -.0421000 | 1 | 2.2539000 | 1 | -.9326000 | 1 |
| H | -.0583000 | 1 | 2.3118000 | 1 | .9051000 | 1 |
| O | 3.5878000 | 1 | -3.4980000 | 1 | .2612000 | 1 |
| O | 5.2881000 | 1 | -2.7501000 | 1 | -.7083000 | 1 |

*************************************************

AM1 PRECISE ISCF LET POLAR GRAD XYZ

B8

| C | 2.2864246 | 1 | 1.2735791 | 1 | .0353354 | 1 |
| --- | --- | --- | --- | --- | --- | --- |
| C | 3.6950370 | 1 | 1.2329696 | 1 | .0150477 | 1 |
| C | 4.3710764 | 1 | .0038889 | 1 | .0550605 | 1 |
| C | 3.6342540 | 1 | -1.1939935 | 1 | .1698231 | 1 |
| C | 2.2316618 | 1 | -1.1204161 | 1 | .1705979 | 1 |
| C | 1.5402085 | 1 | .0827504 | 1 | .0832880 | 1 |
| N | 5.8587677 | 1 | .0001503 | 1 | .0000421 | 1 |
| C | 6.4003669 | 1 | -.2366917 | 1 | 1.3734785 | 1 |
| C | 6.3528207 | 1 | -1.0597520 | 1 | -.9333064 | 1 |
| C | 6.3904885 | 1 | 1.3121778 | 1 | -.4903043 | 1 |
| C | .0001684 | 1 | -.0001147 | 1 | -.0000960 | 1 |
| O | -.6192838 | 1 | -.0403282 | 1 | 1.0883390 | 1 |
| O | -.4744322 | 1 | -.0334833 | 1 | -1.1613795 | 1 |
| O | 1.7998090 | 1 | 2.5537229 | 1 | -.0006189 | 1 |
| C | .3803197 | 1 | 2.7329267 | 1 | .0793828 | 1 |
| C | 4.2100547 | 1 | -2.5324930 | 1 | .2343861 | 1 |
| C | 4.4498676 | 1 | -3.2238354 | 1 | 1.3695071 | 1 |
| C | 4.9833028 | 1 | -4.5456458 | 1 | 1.3204151 | 1 |
| N | 5.4243533 | 1 | -5.6208861 | 1 | 1.2808097 | 1 |
| C | 4.2098836 | 1 | -2.7099829 | 1 | 2.6761075 | 1 |
| N | 4.0118048 | 1 | -2.3000076 | 1 | 3.7462980 | 1 |
| H | 4.2043953 | 1 | 2.2064002 | 1 | -.0328281 | 1 |
| H | 1.6447826 | 1 | -2.0541240 | 1 | .2386242 | 1 |
| H | 7.5200047 | 1 | -.2483839 | 1 | 1.3320292 | 1 |
| H | 6.0439843 | 1 | .5824664 | 1 | 2.0534390 | 1 |
| H | 6.0173284 | 1 | -1.2202310 | 1 | 1.7570426 | 1 |
| H | 7.3857387 | 1 | -.8016524 | 1 | -1.2889203 | 1 |
| H | 6.4012994 | 1 | -2.0471656 | 1 | -.4032105 | 1 |
| H | 5.6568745 | 1 | -1.1294956 | 1 | -1.8112195 | 1 |
| H | 7.5004970 | 1 | 1.2271308 | 1 | -.6319836 | 1 |
| H | 5.8978039 | 1 | 1.5694354 | 1 | -1.4650056 | 1 |
| H | 6.1875117 | 1 | 2.1136961 | 1 | .2682092 | 1 |
| H | .2784336 | 1 | 3.8473373 | 1 | .1010284 | 1 |
| H | -.0216796 | 1 | 2.2673700 | 1 | 1.0135615 | 1 |
| H | -.1143718 | 1 | 2.2952124 | 1 | -.8235925 | 1 |
| H | 4.3775245 | 1 | -3.0207033 | 1 | -.7468404 | 1 |

*************************************************

AM1 PRECISE ISCF LET POLAR GRAD XYZ

B9

| C | 2.5923000 | 1 | 1.4160000 | 1 | .0528000 | 1 |
| --- | --- | --- | --- | --- | --- | --- |
| C | 4.0176000 | 1 | 1.2754000 | 1 | -.0807000 | 1 |
| C | 4.6456000 | 1 | .0554000 | 1 | .1512000 | 1 |
| C | 3.8902000 | 1 | -1.0781000 | 1 | .5409000 | 1 |
| C | 2.4833000 | 1 | -.9536000 | 1 | .5541000 | 1 |
| C | 1.8378000 | 1 | .2302000 | 1 | .2617000 | 1 |
| N | 6.0828000 | 1 | -.0003000 | 1 | -.0002000 | 1 |
| C | 6.8804000 | 1 | .7904000 | 1 | .7882000 | 1 |
| C | 8.2707000 | 1 | .7461000 | 1 | .6720000 | 1 |
| C | 8.8617000 | 1 | -.1180000 | 1 | -.2604000 | 1 |
| C | 8.0434000 | 1 | -.9084000 | 1 | -1.0651000 | 1 |
| C | 6.6479000 | 1 | -.8388000 | 1 | -.9202000 | 1 |
| S | -.0003000 | 1 | .0002000 | 1 | .0001000 | 1 |
| O | -.0793000 | 1 | -1.3804000 | 1 | -.2090000 | 1 |
| O | -.5624000 | 1 | .4654000 | 1 | 1.1924000 | 1 |
| O | -.2393000 | 1 | .8016000 | 1 | -1.1222000 | 1 |
| N | 2.0594000 | 1 | 2.6791000 | 1 | .0002000 | 1 |
| C | 2.7700000 | 1 | 3.7345000 | 1 | -.6714000 | 1 |
| C | .7319000 | 1 | 2.9933000 | 1 | .4674000 | 1 |
| N | 4.4899000 | 1 | -2.3699000 | 1 | .9152000 | 1 |
| O | 3.8546000 | 1 | -3.1382000 | 1 | 1.5790000 | 1 |
| O | 5.6124000 | 1 | -2.6447000 | 1 | .5466000 | 1 |
| H | 4.6272000 | 1 | 2.1459000 | 1 | -.3705000 | 1 |
| H | 1.8698000 | 1 | -1.8598000 | 1 | .7704000 | 1 |
| H | 6.3636000 | 1 | 1.4507000 | 1 | 1.5152000 | 1 |
| H | 8.8853000 | 1 | 1.3869000 | 1 | 1.3239000 | 1 |
| H | 9.9597000 | 1 | -.1706000 | 1 | -.3517000 | 1 |
| H | 8.4634000 | 1 | -1.6042000 | 1 | -1.8098000 | 1 |
| H | 5.9590000 | 1 | -1.4717000 | 1 | -1.5212000 | 1 |
| H | 2.0635000 | 1 | 4.5728000 | 1 | -.9156000 | 1 |
| H | 3.5871000 | 1 | 4.1352000 | 1 | -.0114000 | 1 |
| H | 3.2235000 | 1 | 3.3687000 | 1 | -1.6322000 | 1 |
| H | .7173000 | 1 | 4.0639000 | 1 | .8056000 | 1 |
| H | -.0279000 | 1 | 2.8487000 | 1 | -.3520000 | 1 |
| H | .4623000 | 1 | 2.3381000 | 1 | 1.3418000 | 1 |

*************************************************

AM1 PRECISE ISCF LET POLAR GRAD XYZ

B10

| C | 2.5924000 | 1 | 1.3356000 | 1 | -.0358000 | 1 |
| --- | --- | --- | --- | --- | --- | --- |
| C | 4.0098000 | 1 | 1.2569000 | 1 | .0122000 | 1 |
| C | 4.6577000 | 1 | .0218000 | 1 | -.1020000 | 1 |
| C | 3.9216000 | 1 | -1.1725000 | 1 | -.2773000 | 1 |
| C | 2.5234000 | 1 | -1.0706000 | 1 | -.2580000 | 1 |
| C | 1.8571000 | 1 | .1425000 | 1 | -.1309000 | 1 |
| N | 6.0988000 | 1 | .0000000 | 1 | .0000000 | 1 |
| C | 6.8546000 | 1 | .7814000 | 1 | -.8323000 | 1 |
| C | 8.2514000 | 1 | .8115000 | 1 | -.7194000 | 1 |
| C | 8.8830000 | 1 | .0351000 | 1 | .2549000 | 1 |
| C | 8.1023000 | 1 | -.7526000 | 1 | 1.1074000 | 1 |
| C | 6.7101000 | 1 | -.7521000 | 1 | .9681000 | 1 |
| S | .0000000 | 1 | -.0001000 | 1 | .0000000 | 1 |
| O | -.2874000 | 1 | .8843000 | 1 | 1.0470000 | 1 |
| O | -.1514000 | 1 | -1.3613000 | 1 | .2917000 | 1 |
| O | -.4343000 | 1 | .4024000 | 1 | -1.2645000 | 1 |
| N | 2.0498000 | 1 | 2.6515000 | 1 | .0000000 | 1 |
| C | .9472000 | 1 | 2.9156000 | 1 | -.9018000 | 1 |
| C | 1.8286000 | 1 | 3.1520000 | 1 | 1.3447000 | 1 |
| C | 4.4915000 | 1 | -2.4950000 | 1 | -.4568000 | 1 |
| C | 5.4132000 | 1 | -2.8635000 | 1 | -1.3763000 | 1 |
| C | 5.8689000 | 1 | -4.2109000 | 1 | -1.4569000 | 1 |
| N | 6.2433000 | 1 | -5.3100000 | 1 | -1.5241000 | 1 |
| C | 5.9817000 | 1 | -1.9735000 | 1 | -2.3299000 | 1 |
| N | 6.4473000 | 1 | -1.2421000 | 1 | -3.1054000 | 1 |
| H | 4.5923000 | 1 | 2.1830000 | 1 | .1502000 | 1 |
| H | 1.9165000 | 1 | -1.9981000 | 1 | -.3327000 | 1 |
| H | 6.3082000 | 1 | 1.3717000 | 1 | -1.5996000 | 1 |
| H | 8.8288000 | 1 | 1.4432000 | 1 | -1.4141000 | 1 |
| H | 9.9820000 | 1 | .0430000 | 1 | .3520000 | 1 |
| H | 8.5617000 | 1 | -1.3750000 | 1 | 1.8922000 | 1 |
| H | 6.0470000 | 1 | -1.3532000 | 1 | 1.6249000 | 1 |
| H | -.0587000 | 1 | 2.7312000 | 1 | -.4306000 | 1 |
| H | 1.0208000 | 1 | 3.9967000 | 1 | -1.1918000 | 1 |
| H | 1.0240000 | 1 | 2.2771000 | 1 | -1.8215000 | 1 |
| H | 2.7544000 | 1 | 2.9925000 | 1 | 1.9553000 | 1 |
| H | 1.6251000 | 1 | 4.2523000 | 1 | 1.2683000 | 1 |
| H | .9554000 | 1 | 2.6487000 | 1 | 1.8493000 | 1 |
| H | 4.0547000 | 1 | -3.2741000 | 1 | .2036000 | 1 |

*************************************************

AM1 PRECISE ISCF LET POLAR GRAD XYZ

B11

| C | 2.2683000 | 1 | 1.3039000 | 1 | -.0015000 | 1 |
| --- | --- | --- | --- | --- | --- | --- |
| C | 3.6930000 | 1 | 1.2176000 | 1 | .0485000 | 1 |
| C | 4.3508000 | 1 | -.0116000 | 1 | -.0546000 | 1 |
| C | 3.6146000 | 1 | -1.2117000 | 1 | -.1849000 | 1 |
| C | 2.2053000 | 1 | -1.1298000 | 1 | -.1850000 | 1 |
| C | 1.5414000 | 1 | .0777000 | 1 | -.0861000 | 1 |
| N | 5.7950000 | 1 | -.0012000 | 1 | -.0001000 | 1 |
| C | 6.4255000 | 1 | .3957000 | 1 | 1.1520000 | 1 |
| C | 7.8193000 | 1 | .4206000 | 1 | 1.2331000 | 1 |
| C | 8.5854000 | 1 | .0360000 | 1 | .1242000 | 1 |
| C | 7.9359000 | 1 | -.3578000 | 1 | -1.0443000 | 1 |
| C | 6.5321000 | 1 | -.3725000 | 1 | -1.0894000 | 1 |
| C | .0002000 | 1 | -.0001000 | 1 | .0000000 | 1 |
| O | -.4924000 | 1 | .2020000 | 1 | 1.1369000 | 1 |
| O | -.6064000 | 1 | -.2666000 | 1 | -1.0643000 | 1 |
| N | 1.6699000 | 1 | 2.5432000 | 1 | .0001000 | 1 |
| C | 2.3992000 | 1 | 3.6814000 | 1 | .4876000 | 1 |
| C | .2601000 | 1 | 2.7180000 | 1 | -.2506000 | 1 |
| N | 4.2448000 | 1 | -2.5415000 | 1 | -.2950000 | 1 |
| O | 3.6185000 | 1 | -3.5161000 | 1 | .0086000 | 1 |
| O | 5.3823000 | 1 | -2.6344000 | 1 | -.7047000 | 1 |
| H | 4.2938000 | 1 | 2.1354000 | 1 | .1486000 | 1 |
| H | 1.6032000 | 1 | -2.0577000 | 1 | -.2570000 | 1 |
| H | 5.7736000 | 1 | .6840000 | 1 | 2.0027000 | 1 |
| H | 8.2973000 | 1 | .7350000 | 1 | 2.1747000 | 1 |
| H | 9.6871000 | 1 | .0429000 | 1 | .1795000 | 1 |
| H | 8.4969000 | 1 | -.6730000 | 1 | -1.9388000 | 1 |
| H | 5.9719000 | 1 | -.7082000 | 1 | -1.9892000 | 1 |
| H | 1.6920000 | 1 | 4.5210000 | 1 | .7198000 | 1 |
| H | 3.1311000 | 1 | 4.0357000 | 1 | -.2892000 | 1 |
| H | 2.9648000 | 1 | 3.4304000 | 1 | 1.4263000 | 1 |
| H | .0697000 | 1 | 3.7914000 | 1 | -.5155000 | 1 |
| H | -.3490000 | 1 | 2.4348000 | 1 | .6535000 | 1 |
| H | -.0586000 | 1 | 2.0712000 | 1 | -1.1151000 | 1 |

*************************************************

AM1 PRECISE ISCF LET POLAR GRAD XYZ

B12

| C | 2.2627000 | 1 | 1.3139000 | 1 | .0227000 | 1 |
| --- | --- | --- | --- | --- | --- | --- |
| C | 3.6802000 | 1 | 1.2314000 | 1 | .0976000 | 1 |
| C | 4.3341000 | 1 | -.0055000 | 1 | -.0147000 | 1 |
| C | 3.6167000 | 1 | -1.2044000 | 1 | -.1868000 | 1 |
| C | 2.2121000 | 1 | -1.1077000 | 1 | -.2413000 | 1 |
| C | 1.5367000 | 1 | .0910000 | 1 | -.1009000 | 1 |
| N | 5.7794000 | 1 | .0000000 | 1 | .0000000 | 1 |
| C | 6.4522000 | 1 | .5681000 | 1 | 1.0476000 | 1 |
| C | 7.8522000 | 1 | .6343000 | 1 | 1.0529000 | 1 |
| C | 8.5737000 | 1 | .1143000 | 1 | -.0241000 | 1 |
| C | 7.8779000 | 1 | -.4608000 | 1 | -1.0925000 | 1 |
| C | 6.4794000 | 1 | -.5031000 | 1 | -1.0640000 | 1 |
| C | .0002000 | 1 | -.0006000 | 1 | .0001000 | 1 |
| O | -.6100000 | 1 | -.3824000 | 1 | -1.0274000 | 1 |
| O | -.4930000 | 1 | .2929000 | 1 | 1.1175000 | 1 |
| N | 1.6639000 | 1 | 2.5616000 | 1 | .0000000 | 1 |
| C | 2.2918000 | 1 | 3.6427000 | 1 | .7100000 | 1 |
| C | .2698000 | 1 | 2.7244000 | 1 | -.3303000 | 1 |
| C | 4.1920000 | 1 | -2.5297000 | 1 | -.2925000 | 1 |
| C | 5.0597000 | 1 | -3.1068000 | 1 | .5716000 | 1 |
| C | 5.5397000 | 1 | -2.4623000 | 1 | 1.7451000 | 1 |
| N | 5.9304000 | 1 | -1.9219000 | 1 | 2.6986000 | 1 |
| C | 5.5367000 | 1 | -4.4317000 | 1 | .3574000 | 1 |
| N | 5.9275000 | 1 | -5.5125000 | 1 | .1795000 | 1 |
| H | 4.2754000 | 1 | 2.1509000 | 1 | .2120000 | 1 |
| H | 1.6137000 | 1 | -2.0280000 | 1 | -.3703000 | 1 |
| H | 5.8360000 | 1 | .9538000 | 1 | 1.8886000 | 1 |
| H | 8.3602000 | 1 | 1.0888000 | 1 | 1.9182000 | 1 |
| H | 9.6760000 | 1 | .1552000 | 1 | -.0317000 | 1 |
| H | 8.4086000 | 1 | -.8805000 | 1 | -1.9624000 | 1 |
| H | 5.8810000 | 1 | -.9405000 | 1 | -1.8903000 | 1 |
| H | 1.5341000 | 1 | 4.4314000 | 1 | .9626000 | 1 |
| H | 3.0889000 | 1 | 4.1071000 | 1 | .0662000 | 1 |
| H | 2.7644000 | 1 | 3.2895000 | 1 | 1.6665000 | 1 |
| H | .1115000 | 1 | 3.7839000 | 1 | -.6648000 | 1 |
| H | -.3948000 | 1 | 2.4989000 | 1 | .5505000 | 1 |
| H | -.0062000 | 1 | 2.0332000 | 1 | -1.1735000 | 1 |
| H | 3.8083000 | 1 | -3.1307000 | 1 | -1.1440000 | 1 |

*************************************************

AM1 PRECISE ISCF LET POLAR GRAD XYZ

B13

| C | 2.6699000 | 1 | 1.3016000 | 1 | .1013000 | 1 |
| --- | --- | --- | --- | --- | --- | --- |
| C | 4.0854000 | 1 | 1.2450000 | 1 | .1001000 | 1 |
| C | 4.7360000 | 1 | .0111000 | 1 | .0542000 | 1 |
| C | 3.9647000 | 1 | -1.1822000 | 1 | .0152000 | 1 |
| C | 2.5652000 | 1 | -1.0914000 | 1 | .0116000 | 1 |
| C | 1.9067000 | 1 | .1372000 | 1 | .0593000 | 1 |
| N | 6.1777000 | 1 | -.0011000 | 1 | .0002000 | 1 |
| C | 6.8072000 | 1 | .5342000 | 1 | -1.0969000 | 1 |
| C | 8.2000000 | 1 | .5427000 | 1 | -1.1911000 | 1 |
| C | 8.9675000 | 1 | -.0008000 | 1 | -.1523000 | 1 |
| C | 8.3202000 | 1 | -.5273000 | 1 | .9648000 | 1 |
| C | 6.9172000 | 1 | -.5202000 | 1 | 1.0271000 | 1 |
| S | .0000000 | 1 | .0001000 | 1 | .0000000 | 1 |
| O | -.3260000 | 1 | .7628000 | 1 | -1.1126000 | 1 |
| O | -.1485000 | 1 | -1.3816000 | 1 | -.1275000 | 1 |
| O | -.3500000 | 1 | .5352000 | 1 | 1.2406000 | 1 |
| O | 2.1743000 | 1 | 2.5839000 | 1 | .0002000 | 1 |
| C | 1.4314000 | 1 | 3.0690000 | 1 | 1.1253000 | 1 |
| N | 4.5905000 | 1 | -2.5258000 | 1 | -.0415000 | 1 |
| O | 4.0227000 | 1 | -3.4127000 | 1 | -.6079000 | 1 |
| O | 5.6607000 | 1 | -2.7028000 | 1 | .4965000 | 1 |
| H | 4.6451000 | 1 | 2.1938000 | 1 | .1183000 | 1 |
| H | 1.9508000 | 1 | -2.0212000 | 1 | -.0477000 | 1 |
| H | 6.1535000 | 1 | .9488000 | 1 | -1.8927000 | 1 |
| H | 8.6751000 | 1 | .9715000 | 1 | -2.0883000 | 1 |
| H | 10.0686000 | 1 | -.0122000 | 1 | -.2207000 | 1 |
| H | 8.8839000 | 1 | -.9650000 | 1 | 1.8047000 | 1 |
| H | 6.3600000 | 1 | -.9573000 | 1 | 1.8845000 | 1 |
| H | 1.0184000 | 1 | 4.0391000 | 1 | .7494000 | 1 |
| H | 2.1327000 | 1 | 3.2377000 | 1 | 1.9786000 | 1 |
| H | .6075000 | 1 | 2.3708000 | 1 | 1.4145000 | 1 |

*************************************************

AM1 PRECISE ISCF LET POLAR GRAD XYZ

B14

| C | 2.5261000 | 1 | -1.0128000 | 1 | -.2192000 | 1 |
| --- | --- | --- | --- | --- | --- | --- |
| C | 3.9262000 | 1 | -1.1438000 | 1 | -.2568000 | 1 |
| C | 4.6874000 | 1 | .0380000 | 1 | -.1140000 | 1 |
| C | 4.0621000 | 1 | 1.2825000 | 1 | -.0297000 | 1 |
| N | 6.1275000 | 1 | .0000000 | 1 | .0000000 | 1 |
| C | 4.4548000 | 1 | -2.4807000 | 1 | -.4342000 | 1 |
| C | 1.8653000 | 1 | .2060000 | 1 | -.1090000 | 1 |
| C | 2.6423000 | 1 | 1.3699000 | 1 | -.0562000 | 1 |
| S | .0000000 | 1 | .0000000 | 1 | .0000000 | 1 |
| C | 5.4035000 | 1 | -2.8791000 | 1 | -1.3140000 | 1 |
| C | 6.0485000 | 1 | -2.0053000 | 1 | -2.2318000 | 1 |
| C | 5.8083000 | 1 | -4.2432000 | 1 | -1.3834000 | 1 |
| C | 6.8992000 | 1 | .7878000 | 1 | -.8117000 | 1 |
| C | 6.7203000 | 1 | -.7619000 | 1 | .9719000 | 1 |
| O | 2.2524000 | 1 | 2.6758000 | 1 | .0000000 | 1 |
| C | 8.2939000 | 1 | .8164000 | 1 | -.6718000 | 1 |
| C | 8.9065000 | 1 | .0324000 | 1 | .3084000 | 1 |
| C | 8.1097000 | 1 | -.7644000 | 1 | 1.1371000 | 1 |
| C | .8702000 | 1 | 3.0224000 | 1 | -.1232000 | 1 |
| H | 4.6332000 | 1 | 2.2175000 | 1 | .0805000 | 1 |
| H | 1.9153000 | 1 | -1.9407000 | 1 | -.2873000 | 1 |
| H | 6.3688000 | 1 | 1.3850000 | 1 | -1.5847000 | 1 |
| H | 8.8841000 | 1 | 1.4552000 | 1 | -1.3493000 | 1 |
| H | 10.0033000 | 1 | .0403000 | 1 | .4277000 | 1 |
| H | 8.5539000 | 1 | -1.3949000 | 1 | 1.9243000 | 1 |
| H | 6.0443000 | 1 | -1.3688000 | 1 | 1.6103000 | 1 |
| O | -.4473000 | 1 | .6397000 | 1 | -1.1579000 | 1 |
| O | -.1353000 | 1 | -1.3928000 | 1 | .0162000 | 1 |
| O | -.2993000 | 1 | .6489000 | 1 | 1.2008000 | 1 |
| H | .9096000 | 1 | 4.1419000 | 1 | -.1545000 | 1 |
| H | .3020000 | 1 | 2.6690000 | 1 | .7740000 | 1 |
| H | .4403000 | 1 | 2.6104000 | 1 | -1.0702000 | 1 |
| H | 3.9566000 | 1 | -3.2539000 | 1 | .1894000 | 1 |
| N | 6.5762000 | 1 | -1.2833000 | 1 | -2.9761000 | 1 |
| N | 6.1405000 | 1 | -5.3564000 | 1 | -1.4373000 | 1 |

*************************************************

AM1 PRECISE ISCF LET POLAR GRAD XYZ

B15

| C | 1.5474000 | 1 | .0674000 | 1 | .0153000 | 1 |
| --- | --- | --- | --- | --- | --- | --- |
| C | 2.2212000 | 1 | -1.1511000 | 1 | .0340000 | 1 |
| C | 3.6251000 | 1 | -1.2190000 | 1 | .0554000 | 1 |
| C | 4.3732000 | 1 | -.0126000 | 1 | .0337000 | 1 |
| N | 4.2654000 | 1 | -2.5538000 | 1 | .0895000 | 1 |
| C | 2.2924000 | 1 | 1.2582000 | 1 | .0094000 | 1 |
| C | .0000000 | 1 | .0000000 | 1 | .0000000 | 1 |
| O | -.5531000 | 1 | -.0558000 | 1 | 1.1227000 | 1 |
| O | -.5348000 | 1 | .0017000 | 1 | -1.1330000 | 1 |
| C | 3.7073000 | 1 | 1.2161000 | 1 | .0066000 | 1 |
| O | 1.8113000 | 1 | 2.5360000 | 1 | .0000000 | 1 |
| N | 5.8151000 | 1 | .0000000 | 1 | .0000000 | 1 |
| C | 6.4539000 | 1 | .4768000 | 1 | -1.1179000 | 1 |
| C | 6.5451000 | 1 | -.4429000 | 1 | 1.0677000 | 1 |
| C | 7.8479000 | 1 | .5103000 | 1 | -1.1861000 | 1 |
| C | 8.6065000 | 1 | .0523000 | 1 | -.1006000 | 1 |
| C | 7.9489000 | 1 | -.4226000 | 1 | 1.0331000 | 1 |
| C | .3899000 | 1 | 2.7274000 | 1 | .0096000 | 1 |
| H | 4.2571000 | 1 | 2.1704000 | 1 | -.0104000 | 1 |
| H | 1.6230000 | 1 | -2.0840000 | 1 | .0319000 | 1 |
| H | 5.8074000 | 1 | .8251000 | 1 | -1.9505000 | 1 |
| H | 8.3318000 | 1 | .8927000 | 1 | -2.0993000 | 1 |
| H | 9.7086000 | 1 | .0667000 | 1 | -.1466000 | 1 |
| H | 8.5048000 | 1 | -.7966000 | 1 | 1.9084000 | 1 |
| H | 5.9797000 | 1 | -.8380000 | 1 | 1.9398000 | 1 |
| H | .2998000 | 1 | 3.8430000 | 1 | .0235000 | 1 |
| H | -.0653000 | 1 | 2.2901000 | 1 | -.9140000 | 1 |
| H | -.0581000 | 1 | 2.2688000 | 1 | .9262000 | 1 |
| O | 3.6729000 | 1 | -3.4975000 | 1 | -.3472000 | 1 |
| O | 5.3696000 | 1 | -2.6741000 | 1 | .5719000 | 1 |

*************************************************

AM1 PRECISE ISCF LET POLAR GRAD XYZ

B16

| C | 2.2905000 | 1 | 1.2700000 | 1 | .0222000 | 1 |
| --- | --- | --- | --- | --- | --- | --- |
| C | 3.6997000 | 1 | 1.2232000 | 1 | .0338000 | 1 |
| C | 4.3573000 | 1 | -.0169000 | 1 | .0445000 | 1 |
| C | 3.6270000 | 1 | -1.2255000 | 1 | .0570000 | 1 |
| C | 2.2234000 | 1 | -1.1364000 | 1 | .0303000 | 1 |
| C | 1.5434000 | 1 | .0769000 | 1 | .0214000 | 1 |
| N | 5.7999000 | 1 | -.0001000 | 1 | .0003000 | 1 |
| C | 6.4965000 | 1 | .7250000 | 1 | .9302000 | 1 |
| C | 7.8928000 | 1 | .8269000 | 1 | .8660000 | 1 |
| C | 8.5862000 | 1 | .1814000 | 1 | -.1604000 | 1 |
| C | 7.8664000 | 1 | -.5531000 | 1 | -1.1085000 | 1 |
| C | 6.4720000 | 1 | -.6257000 | 1 | -1.0159000 | 1 |
| C | .0002000 | 1 | .0001000 | 1 | .0000000 | 1 |
| O | -.5249000 | 1 | -.1220000 | 1 | -1.1326000 | 1 |
| O | -.5712000 | 1 | .0493000 | 1 | 1.1149000 | 1 |
| O | 1.8057000 | 1 | 2.5493000 | 1 | -.0008000 | 1 |
| C | .3861000 | 1 | 2.7291000 | 1 | -.0848000 | 1 |
| C | 4.1928000 | 1 | -2.5609000 | 1 | .0793000 | 1 |
| C | 5.1184000 | 1 | -3.0500000 | 1 | .9361000 | 1 |
| C | 5.7115000 | 1 | -2.2853000 | 1 | 1.9785000 | 1 |
| N | 6.1977000 | 1 | -1.6494000 | 1 | 2.8227000 | 1 |
| C | 5.5546000 | 1 | -4.4035000 | 1 | .8466000 | 1 |
| N | 5.9121000 | 1 | -5.5076000 | 1 | .7726000 | 1 |
| H | 4.2545000 | 1 | 2.1737000 | 1 | .0133000 | 1 |
| H | 1.6259000 | 1 | -2.0661000 | 1 | .0268000 | 1 |
| H | 5.9023000 | 1 | 1.2116000 | 1 | 1.7336000 | 1 |
| H | 8.4207000 | 1 | 1.4123000 | 1 | 1.6368000 | 1 |
| H | 9.6854000 | 1 | .2491000 | 1 | -.2228000 | 1 |
| H | 8.3760000 | 1 | -1.0743000 | 1 | -1.9352000 | 1 |
| H | 5.8563000 | 1 | -1.1846000 | 1 | -1.7511000 | 1 |
| H | .2876000 | 1 | 3.8422000 | 1 | -.1530000 | 1 |
| H | -.0187000 | 1 | 2.2269000 | 1 | -.9987000 | 1 |
| H | -.1087000 | 1 | 2.3295000 | 1 | .8352000 | 1 |
| H | 3.7436000 | 1 | -3.2541000 | 1 | -.6636000 | 1 |

*************************************************

AM1 1SCF LET PRECISE POLAR GRAD XYZ

P1

| N | 6.9846 | 1 | 1.4530 | 1 | -.0858 | 1 |
| --- | --- | --- | --- | --- | --- | --- |
| C | 6.5734 | 1 | 2.6866 | 1 | -.5956 | 1 |
| C | 7.5155 | 1 | 3.1121 | 1 | -1.5623 | 1 |
| C | 8.5086 | 1 | 2.1011 | 1 | -1.6568 | 1 |
| C | 8.1615 | 1 | 1.0839 | 1 | -.7329 | 1 |
| N | 3.9944 | 1 | -1.5591 | 1 | -.8079 | 1 |
| C | 2.5888 | 1 | -1.3221 | 1 | -.6042 | 1 |
| C | 1.9329 | 1 | -2.6196 | 1 | -.8454 | 1 |
| C | 2.9038 | 1 | -3.5470 | 1 | -1.1480 | 1 |
| C | 4.2024 | 1 | -2.8666 | 1 | -1.1176 | 1 |
| N | 6.9277 | 1 | -1.5601 | 1 | -.8303 | 1 |
| C | 8.3025 | 1 | -1.3792 | 1 | -.7183 | 1 |
| C | 9.0039 | 1 | -2.6862 | 1 | -.9790 | 1 |
| C | 8.0447 | 1 | -3.5963 | 1 | -1.2769 | 1 |
| C | 6.7150 | 1 | -2.8842 | 1 | -1.1464 | 1 |
| N | 3.9772 | 1 | 1.3567 | 1 | -.2814 | 1 |
| C | 4.2022 | 1 | 2.7059 | 1 | .1039 | 1 |
| C | 2.9789 | 1 | 3.2243 | 1 | .7559 | 1 |
| C | 2.0562 | 1 | 2.2163 | 1 | .7281 | 1 |
| C | 2.7072 | 1 | 1.0632 | 1 | .0466 | 1 |
| C | 5.3722 | 1 | 3.4024 | 1 | -.1552 | 1 |
| C | 8.8839 | 1 | -.1485 | 1 | -.4698 | 1 |
| C | 5.4781 | 1 | -3.5017 | 1 | -1.3167 | 1 |
| C | 1.9988 | 1 | -.1607 | 1 | -.2237 | 1 |
| N | 10.2755 | 1 | .0000 | 1 | .0000 | 1 |
| C | 11.2367 | 1 | -.1808 | 1 | -1.1279 | 1 |
| C | 10.5690 | 1 | -.9829 | 1 | 1.0901 | 1 |
| C | 10.4876 | 1 | 1.3656 | 1 | .5866 | 1 |
| S | .0000 | 1 | .0000 | 1 | .0000 | 1 |
| O | -.0770 | 1 | .2256 | 1 | 1.3666 | 1 |
| O | -.2641 | 1 | 1.0805 | 1 | -.8240 | 1 |
| O | -.4513 | 1 | -1.2356 | 1 | -.4395 | 1 |
| N | 5.4696 | 1 | 4.7725 | 1 | .0000 | 1 |
| C | 4.3546 | 1 | 5.6414 | 1 | -.2681 | 1 |
| C | 6.7340 | 1 | 5.4207 | 1 | .2026 | 1 |
| N | 5.4474 | 1 | -4.9324 | 1 | -1.7012 | 1 |
| H | 6.4145 | 1 | .8400 | 1 | .4482 | 1 |
| H | 7.4669 | 1 | 4.0320 | 1 | -2.1377 | 1 |
| H | 9.3549 | 1 | 2.0887 | 1 | -2.3355 | 1 |
| H | 4.6876 | 1 | -.8457 | 1 | -.7660 | 1 |
| H | .8476 | 1 | -2.7753 | 1 | -.7835 | 1 |
| H | 2.7626 | 1 | -4.5993 | 1 | -1.3928 | 1 |
| H | 10.0790 | 1 | -2.8370 | 1 | -1.0018 | 1 |
| H | 8.1587 | 1 | -4.6474 | 1 | -1.5493 | 1 |
| H | 2.8820 | 1 | 4.2080 | 1 | 1.2052 | 1 |
| H | 1.0372 | 1 | 2.2019 | 1 | 1.1188 | 1 |
| H | 12.2854 | 1 | -.1107 | 1 | -.7394 | 1 |
| H | 11.0693 | 1 | -1.1794 | 1 | -1.6079 | 1 |
| H | 11.0523 | 1 | .6222 | 1 | -1.8899 | 1 |
| H | 9.7588 | 1 | -.9155 | 1 | 1.8639 | 1 |
| H | 10.6039 | 1 | -2.0253 | 1 | .6855 | 1 |
| H | 10.4171 | 1 | 2.1444 | 1 | -.2180 | 1 |
| H | 9.6991 | 1 | 1.5576 | 1 | 1.3604 | 1 |
| H | 4.6942 | 1 | 6.4968 | 1 | -.9151 | 1 |
| H | 3.9553 | 1 | 6.0608 | 1 | .6949 | 1 |
| H | 3.5352 | 1 | 5.0884 | 1 | -.8016 | 1 |
| H | 6.6011 | 1 | 6.2347 | 1 | .9660 | 1 |
| H | 7.1085 | 1 | 5.8834 | 1 | -.7516 | 1 |
| H | 7.5001 | 1 | 4.6935 | 1 | .5777 | 1 |
| H | 11.5060 | 1 | 1.4032 | 1 | 1.0532 | 1 |
| H | 11.5624 | 1 | -.7389 | 1 | 1.5500 | 1 |
| O | 4.6208 | 1 | -5.3203 | 1 | -2.4815 | 1 |
| O | 6.2618 | 1 | -5.6864 | 1 | -1.2288 | 1 |

*********************************************

AM1 1SCF LET PRECISE POLAR GRAD XYZ

P2

| N | 6.9958 | 1 | 1.4811 | 1 | -0.0712 | 1 |
| --- | --- | --- | --- | --- | --- | --- |
| C | 6.5956 | 1 | 2.7351 | 1 | -0.5431 | 1 |
| C | 7.5759 | 1 | 3.2039 | 1 | -1.4522 | 1 |
| C | 8.5763 | 1 | 2.2030 | 1 | -1.5493 | 1 |
| C | 8.1971 | 1 | 1.1419 | 1 | -0.6863 | 1 |
| N | 4.0147 | 1 | -1.5246 | 1 | -0.7767 | 1 |
| C | 2.6088 | 1 | -1.3041 | 1 | -0.5839 | 1 |
| C | 1.9697 | 1 | -2.6113 | 1 | -0.7976 | 1 |
| C | 2.9583 | 1 | -3.5332 | 1 | -1.0749 | 1 |
| C | 4.2424 | 1 | -2.8342 | 1 | -1.0569 | 1 |
| N | 6.9504 | 1 | -1.5102 | 1 | -0.8100 | 1 |
| C | 8.3119 | 1 | -1.3221 | 1 | -0.7783 | 1 |
| C | 9.0132 | 1 | -2.5942 | 1 | -1.1883 | 1 |
| C | 8.0459 | 1 | -3.5015 | 1 | -1.4690 | 1 |
| C | 6.7256 | 1 | -2.8323 | 1 | -1.1806 | 1 |
| N | 3.9786 | 1 | 1.3907 | 1 | -0.2903 | 1 |
| C | 4.1984 | 1 | 2.7324 | 1 | 0.1021 | 1 |
| C | 2.9738 | 1 | 3.2464 | 1 | 0.7513 | 1 |
| C | 2.0514 | 1 | 2.2357 | 1 | 0.7166 | 1 |
| C | 2.7056 | 1 | 1.0891 | 1 | 0.0367 | 1 |
| C | 5.3761 | 1 | 3.4355 | 1 | -0.1351 | 1 |
| C | 8.9108 | 1 | -0.1025 | 1 | -0.4696 | 1 |
| C | 5.5115 | 1 | -3.4806 | 1 | -1.2698 | 1 |
| C | 2.0063 | 1 | -0.1381 | 1 | -0.2227 | 1 |
| N | 10.3005 | 1 | 0.0000 | 1 | 0.0000 | 1 |
| C | 11.2585 | 1 | -0.0945 | 1 | -1.1413 | 1 |
| C | 10.5993 | 1 | -1.0668 | 1 | 1.0071 | 1 |
| C | 10.5223 | 1 | 1.3125 | 1 | 0.6929 | 1 |
| S | 0.0000 | 1 | 0.0000 | 1 | 0.0000 | 1 |
| O | -0.0804 | 1 | 0.2154 | 1 | 1.3672 | 1 |
| O | -0.2760 | 1 | 1.0788 | 1 | -0.8206 | 1 |
| O | -0.4282 | 1 | -1.2406 | 1 | -0.4482 | 1 |
| N | 5.4531 | 1 | 4.8060 | 1 | 0.0000 | 1 |
| C | 4.3229 | 1 | 5.6619 | 1 | -0.2422 | 1 |
| C | 6.6956 | 1 | 5.4759 | 1 | 0.2662 | 1 |
| C | 5.4261 | 1 | -4.8919 | 1 | -1.5991 | 1 |
| C | 6.1115 | 1 | -5.9012 | 1 | -1.0103 | 1 |
| C | 5.9425 | 1 | -7.2465 | 1 | -1.4496 | 1 |
| N | 5.8060 | 1 | -8.3451 | 1 | -1.8068 | 1 |
| C | 7.0132 | 1 | -5.7326 | 1 | 0.0783 | 1 |
| N | 7.7432 | 1 | -5.6121 | 1 | 0.9761 | 1 |
| H | 6.4128 | 1 | 0.8484 | 1 | 0.4237 | 1 |
| H | 7.5456 | 1 | 4.1461 | 1 | -1.9919 | 1 |
| H | 9.4493 | 1 | 2.2246 | 1 | -2.1927 | 1 |
| H | 4.7014 | 1 | -0.8039 | 1 | -0.7359 | 1 |
| H | 0.8870 | 1 | -2.7807 | 1 | -0.7345 | 1 |
| H | 2.8436 | 1 | -4.5974 | 1 | -1.2634 | 1 |
| H | 10.0858 | 1 | -2.7165 | 1 | -1.3063 | 1 |
| H | 8.1390 | 1 | -4.5167 | 1 | -1.8511 | 1 |
| H | 2.8704 | 1 | 4.2246 | 1 | 1.2111 | 1 |
| H | 1.0318 | 1 | 2.2201 | 1 | 1.1049 | 1 |
| H | 12.3073 | 1 | 0.0109 | 1 | -0.7604 | 1 |
| H | 11.1362 | 1 | -1.0816 | 1 | -1.6557 | 1 |
| H | 11.0279 | 1 | 0.7242 | 1 | -1.8730 | 1 |
| H | 9.8453 | 1 | -1.0002 | 1 | 1.8354 | 1 |
| H | 10.5369 | 1 | -2.0819 | 1 | 0.5403 | 1 |
| H | 10.4394 | 1 | 2.1551 | 1 | -0.0435 | 1 |
| H | 9.7410 | 1 | 1.4396 | 1 | 1.4871 | 1 |
| H | 4.6532 | 1 | 6.5407 | 1 | -0.8614 | 1 |
| H | 3.9112 | 1 | 6.0482 | 1 | 0.7300 | 1 |
| H | 3.5163 | 1 | 5.1108 | 1 | -0.7959 | 1 |
| H | 6.5202 | 1 | 6.2644 | 1 | 1.0488 | 1 |
| H | 7.0855 | 1 | 5.9758 | 1 | -0.6627 | 1 |
| H | 7.4680 | 1 | 4.7557 | 1 | 0.6425 | 1 |
| H | 4.6969 | 1 | -5.1419 | 1 | -2.3966 | 1 |
| H | 11.5468 | 1 | 1.3121 | 1 | 1.1472 | 1 |
| H | 11.6337 | 1 | -0.9107 | 1 | 1.4110 | 1 |

*********************************************

AM1 1SCF LET PRECISE POLAR GRAD XYZ

P3

| N | 6.5867 | 1 | 1.5008 | 1 | .1161 | 1 |
| --- | --- | --- | --- | --- | --- | --- |
| C | 6.1082 | 1 | 2.6257 | 1 | -.5571 | 1 |
| C | 6.8847 | 1 | 2.8240 | 1 | -1.7199 | 1 |
| C | 7.8415 | 1 | 1.7718 | 1 | -1.7705 | 1 |
| C | 7.6450 | 1 | .9676 | 1 | -.6225 | 1 |
| N | 3.5485 | 1 | -1.5914 | 1 | .0725 | 1 |
| C | 2.1586 | 1 | -1.2795 | 1 | -.0316 | 1 |
| C | 1.4610 | 1 | -2.5562 | 1 | -.2155 | 1 |
| C | 2.4062 | 1 | -3.5636 | 1 | -.2003 | 1 |
| C | 3.7172 | 1 | -2.9419 | 1 | -.0195 | 1 |
| N | 6.4368 | 1 | -1.6428 | 1 | -.0938 | 1 |
| C | 7.8104 | 1 | -1.4395 | 1 | -.0724 | 1 |
| C | 8.5127 | 1 | -2.7628 | 1 | .0869 | 1 |
| C | 7.5520 | 1 | -3.7177 | 1 | .1286 | 1 |
| C | 6.2231 | 1 | -3.0012 | 1 | .0177 | 1 |
| N | 3.5495 | 1 | 1.4300 | 1 | -.0489 | 1 |
| C | 3.7790 | 1 | 2.8109 | 1 | .2146 | 1 |
| C | 2.5410 | 1 | 3.3988 | 1 | .7739 | 1 |
| C | 1.5981 | 1 | 2.4071 | 1 | .7880 | 1 |
| C | 2.2638 | 1 | 1.1917 | 1 | .2517 | 1 |
| C | 4.9722 | 1 | 3.4399 | 1 | -.0995 | 1 |
| C | 8.4036 | 1 | -.1978 | 1 | -.2048 | 1 |
| C | 4.9822 | 1 | -3.6307 | 1 | .0572 | 1 |
| C | 1.5577 | 1 | -.0540 | 1 | .0677 | 1 |
| N | 9.8545 | 1 | .0000 | 1 | .0000 | 1 |
| C | 10.1702 | 1 | 1.4530 | 1 | .1895 | 1 |
| C | 10.3319 | 1 | -.7284 | 1 | 1.2233 | 1 |
| C | 10.5931 | 1 | -.4830 | 1 | -1.2078 | 1 |
| C | .0000 | 1 | .0000 | 1 | .0000 | 1 |
| O | -.5169 | 1 | -.5148 | 1 | -1.0176 | 1 |
| O | -.5754 | 1 | .5282 | 1 | .9789 | 1 |
| N | 5.1724 | 1 | 4.8021 | 1 | .0000 | 1 |
| C | 4.1035 | 1 | 5.7408 | 1 | -.2155 | 1 |
| C | 6.5016 | 1 | 5.3505 | 1 | -.0170 | 1 |
| N | 4.9252 | 1 | -5.1025 | 1 | .1883 | 1 |
| O | 4.0227 | 1 | -5.6096 | 1 | .7988 | 1 |
| O | 5.7928 | 1 | -5.7762 | 1 | -.3105 | 1 |
| H | 6.0883 | 1 | 1.0125 | 1 | .8212 | 1 |
| H | 6.7548 | 1 | 3.6212 | 1 | -2.4462 | 1 |
| H | 8.5634 | 1 | 1.5972 | 1 | -2.5620 | 1 |
| H | 4.2698 | 1 | -.9070 | 1 | .1104 | 1 |
| H | .3750 | 1 | -2.6082 | 1 | -.3547 | 1 |
| H | 2.2403 | 1 | -4.6367 | 1 | -.2853 | 1 |
| H | 9.5882 | 1 | -2.9056 | 1 | .1181 | 1 |
| H | 7.6637 | 1 | -4.8001 | 1 | .2109 | 1 |
| H | 2.4431 | 1 | 4.4175 | 1 | 1.1364 | 1 |
| H | .5568 | 1 | 2.4121 | 1 | 1.1203 | 1 |
| H | 11.2562 | 1 | 1.5551 | 1 | .4495 | 1 |
| H | 9.9640 | 1 | 2.0195 | 1 | -.7569 | 1 |
| H | 9.5288 | 1 | 1.8617 | 1 | 1.0132 | 1 |
| H | 10.9272 | 1 | -.0403 | 1 | 1.8802 | 1 |
| H | 9.4531 | 1 | -1.1069 | 1 | 1.8115 | 1 |
| H | 10.9861 | 1 | -1.5908 | 1 | .9292 | 1 |
| H | 10.2314 | 1 | .0910 | 1 | -2.1022 | 1 |
| H | 11.6924 | 1 | -.3221 | 1 | -1.0631 | 1 |
| H | 10.3759 | 1 | -1.5718 | 1 | -1.3663 | 1 |
| H | 4.4706 | 1 | 6.5949 | 1 | -.8477 | 1 |
| H | 3.2390 | 1 | 5.2520 | 1 | -.7405 | 1 |
| H | 3.7553 | 1 | 6.1510 | 1 | .7715 | 1 |
| H | 6.5092 | 1 | 6.2886 | 1 | .6009 | 1 |
| H | 7.2330 | 1 | 4.6214 | 1 | .4205 | 1 |
| H | 6.8256 | 1 | 5.6042 | 1 | -1.0634 | 1 |

**********************************************

AM1 1SCF LET PRECISE POLAR GRAD XYZ

P4

| N | 6.5450 | 1 | 1.5146 | 1 | -0.0321 | 1 |
| --- | --- | --- | --- | --- | --- | --- |
| C | 6.1522 | 1 | 2.7671 | 1 | -0.5169 | 1 |
| C | 7.1024 | 1 | 3.1905 | 1 | -1.4795 | 1 |
| C | 8.0735 | 1 | 2.1641 | 1 | -1.5957 | 1 |
| C | 7.7106 | 1 | 1.1338 | 1 | -0.6889 | 1 |
| N | 3.5329 | 1 | -1.4727 | 1 | -0.7149 | 1 |
| C | 2.1491 | 1 | -1.2183 | 1 | -0.4990 | 1 |
| C | 1.4623 | 1 | -2.5012 | 1 | -0.6309 | 1 |
| C | 2.4211 | 1 | -3.4674 | 1 | -0.8966 | 1 |
| C | 3.7176 | 1 | -2.8051 | 1 | -0.9371 | 1 |
| N | 6.4446 | 1 | -1.5091 | 1 | -0.7316 | 1 |
| C | 7.8027 | 1 | -1.3360 | 1 | -0.7075 | 1 |
| C | 8.4911 | 1 | -2.6311 | 1 | -1.0635 | 1 |
| C | 7.5149 | 1 | -3.5412 | 1 | -1.3041 | 1 |
| C | 6.2011 | 1 | -2.8473 | 1 | -1.0553 | 1 |
| N | 3.5449 | 1 | 1.4709 | 1 | -0.2004 | 1 |
| C | 3.7668 | 1 | 2.8172 | 1 | 0.1630 | 1 |
| C | 2.5317 | 1 | 3.3618 | 1 | 0.7643 | 1 |
| C | 1.5888 | 1 | 2.3674 | 1 | 0.7086 | 1 |
| C | 2.2553 | 1 | 1.2001 | 1 | 0.0913 | 1 |
| C | 4.9562 | 1 | 3.4996 | 1 | -0.0998 | 1 |
| C | 8.4184 | 1 | -0.1085 | 1 | -0.4480 | 1 |
| C | 4.9800 | 1 | -3.4771 | 1 | -1.1336 | 1 |
| C | 1.5524 | 1 | -0.0283 | 1 | -0.1513 | 1 |
| N | 9.8129 | 1 | 0.0000 | 1 | 0.0000 | 1 |
| C | 10.7572 | 1 | -0.1530 | 1 | -1.1466 | 1 |
| C | 10.1122 | 1 | -1.0248 | 1 | 1.0496 | 1 |
| C | 10.0593 | 1 | 1.3401 | 1 | 0.6291 | 1 |
| N | 5.0556 | 1 | 4.8689 | 1 | 0.0000 | 1 |
| C | 3.9319 | 1 | 5.7367 | 1 | -0.2396 | 1 |
| C | 6.3189 | 1 | 5.5325 | 1 | 0.1767 | 1 |
| C | 4.8688 | 1 | -4.8957 | 1 | -1.4259 | 1 |
| C | 5.5162 | 1 | -5.8997 | 1 | -0.7884 | 1 |
| C | 5.3322 | 1 | -7.2544 | 1 | -1.1918 | 1 |
| N | 5.1848 | 1 | -8.3604 | 1 | -1.5199 | 1 |
| C | 6.3882 | 1 | -5.7135 | 1 | 0.3208 | 1 |
| N | 7.0922 | 1 | -5.5761 | 1 | 1.2370 | 1 |
| H | 5.9728 | 1 | 0.9084 | 1 | 0.5065 | 1 |
| H | 7.0689 | 1 | 4.1196 | 1 | -2.0419 | 1 |
| H | 8.9151 | 1 | 2.1447 | 1 | -2.2800 | 1 |
| H | 4.2412 | 1 | -0.7718 | 1 | -0.7157 | 1 |
| H | 0.3804 | 1 | -2.6010 | 1 | -0.4853 | 1 |
| H | 2.2732 | 1 | -4.5349 | 1 | -1.0329 | 1 |
| H | 9.5624 | 1 | -2.7712 | 1 | -1.1729 | 1 |
| H | 7.5988 | 1 | -4.5756 | 1 | -1.6316 | 1 |
| H | 2.4305 | 1 | 4.3493 | 1 | 1.2030 | 1 |
| H | 0.5406 | 1 | 2.3663 | 1 | 1.0077 | 1 |
| H | 11.8119 | 1 | -0.0698 | 1 | -0.7779 | 1 |
| H | 10.5992 | 1 | -1.1484 | 1 | -1.6342 | 1 |
| H | 10.5440 | 1 | 0.6536 | 1 | -1.8976 | 1 |
| H | 9.3524 | 1 | -0.9317 | 1 | 1.8697 | 1 |
| H | 10.0576 | 1 | -2.0571 | 1 | 0.6207 | 1 |
| H | 9.9806 | 1 | 2.1472 | 1 | -0.1455 | 1 |
| H | 9.2919 | 1 | 1.5156 | 1 | 1.4277 | 1 |
| H | 4.2633 | 1 | 6.5974 | 1 | -0.8826 | 1 |
| H | 3.5451 | 1 | 6.1460 | 1 | 0.7330 | 1 |
| H | 3.1074 | 1 | 5.1880 | 1 | -0.7698 | 1 |
| H | 6.1885 | 1 | 6.3547 | 1 | 0.9329 | 1 |
| H | 6.6679 | 1 | 5.9888 | 1 | -0.7898 | 1 |
| H | 7.1000 | 1 | 4.8181 | 1 | 0.5461 | 1 |
| H | 4.1542 | 1 | -5.1499 | 1 | -2.2351 | 1 |
| H | 11.0882 | 1 | 1.3475 | 1 | 1.0741 | 1 |
| H | 11.1424 | 1 | -0.8471 | 1 | 1.4554 | 1 |
| C | 0.0000 | 1 | 0.0000 | 1 | 0.0000 | 1 |
| O | -0.5953 | 1 | 0.8779 | 1 | -0.6619 | 1 |
| O | -0.4913 | 1 | -0.8681 | 1 | 0.7594 | 1 |

**********************************************

AM1 1SCF LET PRECISE POLAR GRAD XYZ

P5

| N | 7.0228 | 1 | 1.4840 | 1 | .1758 | 1 |
| --- | --- | --- | --- | --- | --- | --- |
| C | 6.6199 | 1 | 2.7125 | 1 | .7095 | 1 |
| C | 7.5705 | 1 | 3.1105 | 1 | 1.6782 | 1 |
| C | 8.5622 | 1 | 2.0938 | 1 | 1.7424 | 1 |
| C | 8.2026 | 1 | 1.0961 | 1 | .8046 | 1 |
| N | 3.9988 | 1 | -1.5586 | 1 | .7991 | 1 |
| C | 2.5901 | 1 | -1.3140 | 1 | .6086 | 1 |
| C | 1.9378 | 1 | -2.6246 | 1 | .8105 | 1 |
| C | 2.9082 | 1 | -3.5564 | 1 | 1.0871 | 1 |
| C | 4.2107 | 1 | -2.8748 | 1 | 1.0672 | 1 |
| N | 6.9395 | 1 | -1.5373 | 1 | .8949 | 1 |
| C | 8.3177 | 1 | -1.3670 | 1 | .7454 | 1 |
| C | 9.0083 | 1 | -2.6902 | 1 | .9416 | 1 |
| C | 8.0468 | 1 | -3.5982 | 1 | 1.2359 | 1 |
| C | 6.7224 | 1 | -2.8649 | 1 | 1.1665 | 1 |
| N | 3.9895 | 1 | 1.3364 | 1 | .3394 | 1 |
| C | 4.2097 | 1 | 2.7270 | 1 | .1034 | 1 |
| C | 2.9303 | 1 | 3.3536 | 1 | -.3151 | 1 |
| C | 1.9901 | 1 | 2.3670 | 1 | -.3044 | 1 |
| C | 2.6878 | 1 | 1.1115 | 1 | .1238 | 1 |
| C | 5.4000 | 1 | 3.3745 | 1 | .2866 | 1 |
| C | 8.9060 | 1 | -.1403 | 1 | .5081 | 1 |
| C | 5.4841 | 1 | -3.5016 | 1 | 1.2809 | 1 |
| C | 1.9898 | 1 | -.1416 | 1 | .2932 | 1 |
| N | 10.2861 | 1 | .0000 | 1 | .0000 | 1 |
| C | 10.5235 | 1 | -.9463 | 1 | -1.1358 | 1 |
| C | 11.2770 | 1 | -.2404 | 1 | 1.0901 | 1 |
| C | 10.5109 | 1 | 1.3813 | 1 | -.5438 | 1 |
| S | .0000 | 1 | .0000 | 1 | .0000 | 1 |
| O | -.3254 | 1 | 1.0045 | 1 | .8951 | 1 |
| O | -.4433 | 1 | -1.2747 | 1 | .3178 | 1 |
| O | -.0131 | 1 | .3379 | 1 | -1.3441 | 1 |
| O | 5.3782 | 1 | 4.7217 | 1 | .0000 | 1 |
| C | 6.5407 | 1 | 5.4912 | 1 | .2826 | 1 |
| N | 5.4764 | 1 | -4.9430 | 1 | 1.6241 | 1 |
| O | 4.6997 | 1 | -5.6849 | 1 | 1.0863 | 1 |
| O | 6.2709 | 1 | -5.3527 | 1 | 2.4332 | 1 |
| H | 6.4429 | 1 | .8842 | 1 | -.3632 | 1 |
| H | 7.5323 | 1 | 4.0106 | 1 | 2.2862 | 1 |
| H | 9.4174 | 1 | 2.0695 | 1 | 2.4106 | 1 |
| H | 4.6916 | 1 | -.8432 | 1 | .7737 | 1 |
| H | .8525 | 1 | -2.7828 | 1 | .7420 | 1 |
| H | 2.7720 | 1 | -4.6218 | 1 | 1.2725 | 1 |
| H | 10.0817 | 1 | -2.8563 | 1 | .9265 | 1 |
| H | 8.1568 | 1 | -4.6529 | 1 | 1.4949 | 1 |
| H | 2.8378 | 1 | 4.4080 | 1 | -.5607 | 1 |
| H | .9270 | 1 | 2.4206 | 1 | -.5446 | 1 |
| H | 10.5275 | 1 | -2.0051 | 1 | -.7735 | 1 |
| H | 9.7010 | 1 | -.8170 | 1 | -1.8885 | 1 |
| H | 11.5149 | 1 | -.7183 | 1 | -1.6075 | 1 |
| H | 12.3142 | 1 | -.1826 | 1 | .6704 | 1 |
| H | 11.1353 | 1 | .5424 | 1 | 1.8829 | 1 |
| H | 11.1032 | 1 | -1.2491 | 1 | 1.5450 | 1 |
| H | 11.5253 | 1 | 1.4190 | 1 | -1.0200 | 1 |
| H | 9.7166 | 1 | 1.6098 | 1 | -1.3016 | 1 |
| H | 10.4603 | 1 | 2.1354 | 1 | .2850 | 1 |
| H | 7.4668 | 1 | 4.9928 | 1 | -.0911 | 1 |
| H | 6.3518 | 1 | 6.4472 | 1 | -.2712 | 1 |
| H | 6.6085 | 1 | 5.6843 | 1 | 1.3808 | 1 |

**********************************************

AM1 1SCF LET PRECISE POLAR GRAD XYZ

P6

| N | 6.9840 | 1 | 1.4440 | 1 | -.1088 | 1 |
| --- | --- | --- | --- | --- | --- | --- |
| C | 6.5886 | 1 | 2.7176 | 1 | -.5274 | 1 |
| C | 7.5992 | 1 | 3.2519 | 1 | -1.3635 | 1 |
| C | 8.6103 | 1 | 2.2635 | 1 | -1.4828 | 1 |
| C | 8.2108 | 1 | 1.1528 | 1 | -.6927 | 1 |
| N | 4.0090 | 1 | -1.5341 | 1 | -.7231 | 1 |
| C | 2.5979 | 1 | -1.3129 | 1 | -.5425 | 1 |
| C | 1.9590 | 1 | -2.6170 | 1 | -.8106 | 1 |
| C | 2.9454 | 1 | -3.5262 | 1 | -1.1129 | 1 |
| C | 4.2379 | 1 | -2.8304 | 1 | -1.0561 | 1 |
| N | 6.9478 | 1 | -1.4976 | 1 | -.8422 | 1 |
| C | 8.3187 | 1 | -1.3120 | 1 | -.8007 | 1 |
| C | 9.0126 | 1 | -2.5919 | 1 | -1.1935 | 1 |
| C | 8.0410 | 1 | -3.4935 | 1 | -1.4757 | 1 |
| C | 6.7214 | 1 | -2.8152 | 1 | -1.1967 | 1 |
| N | 3.9690 | 1 | 1.3502 | 1 | -.1866 | 1 |
| C | 4.1899 | 1 | 2.7169 | 1 | .1625 | 1 |
| C | 2.9504 | 1 | 3.2478 | 1 | .7774 | 1 |
| C | 2.0308 | 1 | 2.2383 | 1 | .7590 | 1 |
| C | 2.6943 | 1 | 1.0679 | 1 | .1136 | 1 |
| C | 5.3613 | 1 | 3.3708 | 1 | -.1118 | 1 |
| C | 8.9201 | 1 | -.0982 | 1 | -.4952 | 1 |
| C | 5.5030 | 1 | -3.4697 | 1 | -1.2815 | 1 |
| C | 1.9908 | 1 | -.1588 | 1 | -.1694 | 1 |
| N | 10.3044 | 1 | .0000 | 1 | .0000 | 1 |
| C | 11.2804 | 1 | -.0984 | 1 | -1.1249 | 1 |
| C | 10.5767 | 1 | -1.0692 | 1 | 1.0127 | 1 |
| C | 10.5219 | 1 | 1.3107 | 1 | .7006 | 1 |
| S | .0000 | 1 | .0000 | 1 | .0000 | 1 |
| O | -.1151 | 1 | .2131 | 1 | 1.3656 | 1 |
| O | -.2409 | 1 | 1.0898 | 1 | -.8194 | 1 |
| O | -.4342 | 1 | -1.2323 | 1 | -.4683 | 1 |
| O | 5.5642 | 1 | 4.7241 | 1 | .0000 | 1 |
| C | 4.4460 | 1 | 5.5911 | 1 | -.1974 | 1 |
| C | 5.4207 | 1 | -4.8773 | 1 | -1.6267 | 1 |
| C | 6.0973 | 1 | -5.8978 | 1 | -1.0467 | 1 |
| C | 5.9230 | 1 | -7.2375 | 1 | -1.5017 | 1 |
| N | 5.7826 | 1 | -8.3320 | 1 | -1.8691 | 1 |
| C | 6.9929 | 1 | -5.7453 | 1 | .0486 | 1 |
| N | 7.7187 | 1 | -5.6358 | 1 | .9513 | 1 |
| H | 6.4000 | 1 | .7855 | 1 | .3499 | 1 |
| H | 7.5789 | 1 | 4.2373 | 1 | -1.8209 | 1 |
| H | 9.5036 | 1 | 2.3268 | 1 | -2.0957 | 1 |
| H | 4.6962 | 1 | -.8159 | 1 | -.6539 | 1 |
| H | .8736 | 1 | -2.7808 | 1 | -.7632 | 1 |
| H | 2.8342 | 1 | -4.5823 | 1 | -1.3453 | 1 |
| H | 10.0855 | 1 | -2.7213 | 1 | -1.3048 | 1 |
| H | 8.1304 | 1 | -4.5109 | 1 | -1.8527 | 1 |
| H | 2.8427 | 1 | 4.2428 | 1 | 1.1987 | 1 |
| H | 1.0049 | 1 | 2.2278 | 1 | 1.1326 | 1 |
| H | 12.3232 | 1 | -.0048 | 1 | -.7259 | 1 |
| H | 11.1578 | 1 | -1.0819 | 1 | -1.6454 | 1 |
| H | 11.0711 | 1 | .7275 | 1 | -1.8556 | 1 |
| H | 9.8046 | 1 | -1.0015 | 1 | 1.8240 | 1 |
| H | 10.5256 | 1 | -2.0840 | 1 | .5439 | 1 |
| H | 10.4945 | 1 | 2.1534 | 1 | -.0394 | 1 |
| H | 9.7104 | 1 | 1.4586 | 1 | 1.4604 | 1 |
| H | 4.8837 | 1 | 6.4749 | 1 | -.7296 | 1 |
| H | 4.0585 | 1 | 5.8941 | 1 | .8064 | 1 |
| H | 3.6434 | 1 | 5.1152 | 1 | -.8104 | 1 |
| H | 4.6975 | 1 | -5.1166 | 1 | -2.4333 | 1 |
| H | 11.5243 | 1 | 1.2883 | 1 | 1.2029 | 1 |
| H | 11.6018 | 1 | -.9162 | 1 | 1.4421 | 1 |

**********************************************

AM1 1SCF LET PRECISE POLAR GRAD XYZ

P7

| C | .0000 | 1 | .0000 | 1 | .0000 | 1 |
| --- | --- | --- | --- | --- | --- | --- |
| C | 1.5500 | 1 | -.0166 | 1 | -.1802 | 1 |
| C | 2.2349 | 1 | 1.2421 | 1 | .0101 | 1 |
| N | 3.5367 | 1 | 1.4826 | 1 | -.1745 | 1 |
| C | 1.5141 | 1 | 2.4691 | 1 | .4527 | 1 |
| C | 2.1542 | 1 | -1.1922 | 1 | -.5204 | 1 |
| N | 3.5355 | 1 | -1.4407 | 1 | -.8005 | 1 |
| C | 1.4738 | 1 | -2.4927 | 1 | -.6180 | 1 |
| C | 2.4208 | 1 | -3.4461 | 1 | -.9238 | 1 |
| C | 3.7185 | 1 | -2.7717 | 1 | -1.0343 | 1 |
| C | 4.9803 | 1 | -3.4147 | 1 | -1.2851 | 1 |
| C | 3.7425 | 1 | 2.8741 | 1 | .0882 | 1 |
| C | 2.4481 | 1 | 3.4644 | 1 | .5107 | 1 |
| C | 4.9522 | 1 | 3.4771 | 1 | -.1202 | 1 |
| C | 6.1646 | 1 | 2.7736 | 1 | -.5089 | 1 |
| O | 5.2237 | 1 | 4.8176 | 1 | .0000 | 1 |
| C | 6.2251 | 1 | -2.7916 | 1 | -1.1909 | 1 |
| N | 4.9283 | 1 | -4.8544 | 1 | -1.6246 | 1 |
| C | 4.1614 | 1 | 5.7493 | 1 | -.1978 | 1 |
| N | 6.5327 | 1 | 1.4978 | 1 | -.0773 | 1 |
| C | 7.1735 | 1 | 3.2702 | 1 | -1.3701 | 1 |
| C | 8.1551 | 1 | 2.2532 | 1 | -1.4947 | 1 |
| C | 7.7414 | 1 | 1.1658 | 1 | -.6811 | 1 |
| C | 8.4356 | 1 | -.0950 | 1 | -.4812 | 1 |
| N | 6.4548 | 1 | -1.4740 | 1 | -.8682 | 1 |
| C | 7.5451 | 1 | -3.5022 | 1 | -1.4011 | 1 |
| C | 7.8354 | 1 | -1.3033 | 1 | -.7859 | 1 |
| N | 9.8293 | 1 | .0000 | 1 | .0000 | 1 |
| C | 10.7904 | 1 | -.1382 | 1 | -1.1333 | 1 |
| C | 10.1006 | 1 | -1.0439 | 1 | 1.0388 | 1 |
| C | 10.0691 | 1 | 1.3260 | 1 | .6645 | 1 |
| C | 8.5191 | 1 | -2.6035 | 1 | -1.1164 | 1 |
| H | 5.9400 | 1 | .8591 | 1 | .3982 | 1 |
| H | 7.1707 | 1 | 4.2494 | 1 | -1.8407 | 1 |
| H | 9.0380 | 1 | 2.2848 | 1 | -2.1246 | 1 |
| H | 4.2332 | 1 | -.7327 | 1 | -.8427 | 1 |
| H | .3986 | 1 | -2.5984 | 1 | -.4243 | 1 |
| H | 2.2654 | 1 | -4.5130 | 1 | -1.0801 | 1 |
| H | 9.5918 | 1 | -2.7553 | 1 | -1.1939 | 1 |
| H | 7.6452 | 1 | -4.5425 | 1 | -1.7160 | 1 |
| H | 2.3001 | 1 | 4.4905 | 1 | .8315 | 1 |
| H | .4384 | 1 | 2.4879 | 1 | .6411 | 1 |
| H | 11.8380 | 1 | -.0338 | 1 | -.7489 | 1 |
| H | 10.6596 | 1 | -1.1378 | 1 | -1.6218 | 1 |
| H | 10.5742 | 1 | .6645 | 1 | -1.8882 | 1 |
| H | 9.3427 | 1 | -.9382 | 1 | 1.8597 | 1 |
| H | 10.0270 | 1 | -2.0720 | 1 | .6033 | 1 |
| H | 11.1345 | 1 | -.8944 | 1 | 1.4476 | 1 |
| H | 10.0663 | 1 | 2.1479 | 1 | -.0987 | 1 |
| H | 9.2560 | 1 | 1.5136 | 1 | 1.4139 | 1 |
| H | 11.0671 | 1 | 1.2970 | 1 | 1.1745 | 1 |
| H | 4.6824 | 1 | 6.6585 | 1 | -.5958 | 1 |
| H | 3.6918 | 1 | 5.9756 | 1 | .7905 | 1 |
| H | 3.4077 | 1 | 5.3717 | 1 | -.9290 | 1 |
| O | 4.0238 | 1 | -5.2741 | 1 | -2.2952 | 1 |
| O | 5.7992 | 1 | -5.5872 | 1 | -1.2252 | 1 |
| O | -.6100 | 1 | .8873 | 1 | -.6381 | 1 |
| O | -.4793 | 1 | -.8773 | 1 | .7540 | 1 |

**********************************************

AM1 NOINTER T=600M XYZ 1SCF LET GRAD

P8

| N | 6.5561 | 1 | 1.4982 | 1 | -.0691 | 1 |
| --- | --- | --- | --- | --- | --- | --- |
| C | 6.1773 | 1 | 2.7764 | 1 | -.4889 | 1 |
| C | 7.1860 | 1 | 3.2873 | 1 | -1.3437 | 1 |
| C | 8.1750 | 1 | 2.2802 | 1 | -1.4743 | 1 |
| C | 7.7680 | 1 | 1.1803 | 1 | -.6724 | 1 |
| N | 3.5559 | 1 | -1.4228 | 1 | -.7246 | 1 |
| C | 2.1664 | 1 | -1.1828 | 1 | -.4930 | 1 |
| C | 1.4923 | 1 | -2.4797 | 1 | -.6427 | 1 |
| C | 2.4548 | 1 | -3.4254 | 1 | -.9336 | 1 |
| C | 3.7512 | 1 | -2.7471 | 1 | -.9754 | 1 |
| N | 6.4790 | 1 | -1.4539 | 1 | -.8130 | 1 |
| C | 7.8467 | 1 | -1.2888 | 1 | -.7776 | 1 |
| C | 8.5239 | 1 | -2.5856 | 1 | -1.1483 | 1 |
| C | 7.5397 | 1 | -3.4832 | 1 | -1.4003 | 1 |
| C | 6.2317 | 1 | -2.7807 | 1 | -1.1370 | 1 |
| N | 3.5445 | 1 | 1.4817 | 1 | -.1296 | 1 |
| C | 3.7578 | 1 | 2.8668 | 1 | .1393 | 1 |
| C | 2.4728 | 1 | 3.4567 | 1 | .5871 | 1 |
| C | 1.5331 | 1 | 2.4649 | 1 | .5303 | 1 |
| C | 2.2415 | 1 | 1.2423 | 1 | .0656 | 1 |
| C | 4.9654 | 1 | 3.4722 | 1 | -.0948 | 1 |
| C | 8.4654 | 1 | -.0788 | 1 | -.4808 | 1 |
| C | 5.0051 | 1 | -3.4129 | 1 | -1.2013 | 1 |
| C | 1.5531 | 1 | -.0092 | 1 | -.1484 | 1 |
| N | 9.8544 | 1 | .0000 | 1 | .0000 | 1 |
| C | 10.8215 | 1 | -.1400 | 1 | -1.1277 | 1 |
| C | 10.1113 | 1 | -1.0546 | 1 | 1.0322 | 1 |
| C | 10.1043 | 1 | 1.3202 | 1 | .6704 | 1 |
| O | 5.2256 | 1 | 4.8157 | 1 | .0000 | 1 |
| C | 4.1518 | 1 | 5.7377 | 1 | -.1813 | 1 |
| C | 4.8927 | 1 | -4.8270 | 1 | -1.5131 | 1 |
| C | 5.5333 | 1 | -5.8432 | 1 | -.8877 | 1 |
| C | 5.3493 | 1 | -7.1895 | 1 | -1.3172 | 1 |
| N | 5.1999 | 1 | -8.2870 | 1 | -1.6709 | 1 |
| C | 6.3969 | 1 | -5.6752 | 1 | .2308 | 1 |
| N | 7.0934 | 1 | -5.5496 | 1 | 1.1544 | 1 |
| H | 5.9694 | 1 | .8541 | 1 | .4058 | 1 |
| H | 7.1762 | 1 | 4.2706 | 1 | -1.8065 | 1 |
| H | 9.0603 | 1 | 2.3221 | 1 | -2.1004 | 1 |
| H | 4.2569 | 1 | -.7154 | 1 | -.7178 | 1 |
| H | .4110 | 1 | -2.5914 | 1 | -.4921 | 1 |
| H | 2.3220 | 1 | -4.4927 | 1 | -1.0913 | 1 |
| H | 9.5939 | 1 | -2.7329 | 1 | -1.2612 | 1 |
| H | 7.6130 | 1 | -4.5142 | 1 | -1.7425 | 1 |
| H | 2.3345 | 1 | 4.4782 | 1 | .9258 | 1 |
| H | .4597 | 1 | 2.4875 | 1 | .7312 | 1 |
| H | 11.8674 | 1 | -.0410 | 1 | -.7365 | 1 |
| H | 10.6885 | 1 | -1.1377 | 1 | -1.6188 | 1 |
| H | 10.6126 | 1 | .6645 | 1 | -1.8819 | 1 |
| H | 9.3468 | 1 | -.9523 | 1 | 1.8466 | 1 |
| H | 10.0331 | 1 | -2.0776 | 1 | .5854 | 1 |
| H | 10.1109 | 1 | 2.1434 | 1 | -.0914 | 1 |
| H | 9.2894 | 1 | 1.5132 | 1 | 1.4169 | 1 |
| H | 4.6546 | 1 | 6.6434 | 1 | -.6083 | 1 |
| H | 3.7102 | 1 | 5.9770 | 1 | .8169 | 1 |
| H | 3.3794 | 1 | 5.3443 | 1 | -.8855 | 1 |
| H | 4.1822 | 1 | -5.0687 | 1 | -2.3297 | 1 |
| H | 11.0997 | 1 | 1.2816 | 1 | 1.1852 | 1 |
| H | 11.1423 | 1 | -.9161 | 1 | 1.4511 | 1 |
| C | .0000 | 1 | .0000 | 1 | .0000 | 1 |
| O | -.5995 | 1 | .9185 | 1 | -.6029 | 1 |
| O | -.4931 | 1 | -.9191 | 1 | .6946 | 1 |

**********************************************

AM1 1SCF LET PRECISE POLAR GRAD XYZ

P9

| N | 6.9247 | 1 | 1.4633 | 1 | -0.1662 | 1 |
| --- | --- | --- | --- | --- | --- | --- |
| C | 6.5098 | 1 | 2.6489 | 1 | 0.4411 | 1 |
| C | 7.4519 | 1 | 2.9930 | 1 | 1.4396 | 1 |
| C | 8.4510 | 1 | 1.9840 | 1 | 1.4440 | 1 |
| C | 8.1023 | 1 | 1.0401 | 1 | 0.4447 | 1 |
| N | 3.9993 | 1 | -1.6168 | 1 | -0.6281 | 1 |
| C | 2.5920 | 1 | -1.3869 | 1 | -0.4363 | 1 |
| C | 1.9712 | 1 | -2.7220 | 1 | -0.4490 | 1 |
| C | 2.9601 | 1 | -3.6581 | 1 | -0.6582 | 1 |
| C | 4.2384 | 1 | -2.9496 | 1 | -0.7595 | 1 |
| N | 6.8983 | 1 | -1.5571 | 1 | -0.4857 | 1 |
| C | 8.2607 | 1 | -1.3188 | 1 | -0.4007 | 1 |
| C | 9.0224 | 1 | -2.5595 | 1 | -0.7864 | 1 |
| C | 8.1004 | 1 | -3.5153 | 1 | -1.0568 | 1 |
| C | 6.7419 | 1 | -2.8743 | 1 | -0.8619 | 1 |
| N | 3.9331 | 1 | 1.3415 | 1 | -0.0719 | 1 |
| C | 4.1566 | 1 | 2.7248 | 1 | -0.3186 | 1 |
| C | 2.9461 | 1 | 3.2928 | 1 | -0.9522 | 1 |
| C | 2.0273 | 1 | 2.2837 | 1 | -1.0386 | 1 |
| C | 2.6751 | 1 | 1.0767 | 1 | -0.4583 | 1 |
| C | 5.3156 | 1 | 3.3985 | 1 | 0.0372 | 1 |
| C | 8.8389 | 1 | -0.1320 | 1 | 0.0128 | 1 |
| C | 5.5280 | 1 | -3.5433 | 1 | -0.9999 | 1 |
| C | 1.9784 | 1 | -0.1803 | 1 | -0.3428 | 1 |
| S | 0.0000 | 1 | 0.0000 | 1 | 0.0000 | 1 |
| O | 0.0173 | 1 | 0.7090 | 1 | 1.1868 | 1 |
| O | -0.3966 | 1 | -1.3275 | 1 | 0.0809 | 1 |
| O | -0.4013 | 1 | 0.6803 | 1 | -1.1406 | 1 |
| N | 5.4174 | 1 | 4.7761 | 1 | 0.0000 | 1 |
| C | 6.6878 | 1 | 5.4376 | 1 | -0.1006 | 1 |
| C | 4.2919 | 1 | 5.6232 | 1 | 0.2889 | 1 |
| N | 5.5521 | 1 | -4.9610 | 1 | -1.4246 | 1 |
| O | 6.3479 | 1 | -5.2999 | 1 | -2.2657 | 1 |
| O | 4.8001 | 1 | -5.7542 | 1 | -0.9270 | 1 |
| H | 6.3723 | 1 | 0.9218 | 1 | -0.7876 | 1 |
| H | 7.4029 | 1 | 3.8609 | 1 | 2.0913 | 1 |
| H | 9.3092 | 1 | 1.9454 | 1 | 2.1052 | 1 |
| H | 4.6846 | 1 | -0.8981 | 1 | -0.5756 | 1 |
| H | 0.8937 | 1 | -2.8896 | 1 | -0.3144 | 1 |
| H | 2.8503 | 1 | -4.7405 | 1 | -0.7207 | 1 |
| H | 10.1054 | 1 | -2.6359 | 1 | -0.8111 | 1 |
| H | 8.2503 | 1 | -4.5496 | 1 | -1.3707 | 1 |
| H | 2.8523 | 1 | 4.3121 | 1 | -1.3145 | 1 |
| H | 1.0161 | 1 | 2.2953 | 1 | -1.4521 | 1 |
| H | 6.5854 | 1 | 6.3051 | 1 | -0.8078 | 1 |
| H | 7.4748 | 1 | 4.7414 | 1 | -0.4910 | 1 |
| H | 7.0162 | 1 | 5.8323 | 1 | 0.9005 | 1 |
| H | 4.6073 | 1 | 6.4347 | 1 | 1.0010 | 1 |
| H | 3.4585 | 1 | 5.0342 | 1 | 0.7581 | 1 |
| H | 3.9219 | 1 | 6.1049 | 1 | -0.6567 | 1 |
| N | 10.2696 | 1 | 0.0000 | 1 | 0.0000 | 1 |
| C | 10.9686 | 1 | 0.1327 | 1 | 1.1681 | 1 |
| C | 12.3599 | 1 | 0.3021 | 1 | 1.1610 | 1 |
| C | 13.0491 | 1 | 0.3222 | 1 | -0.0537 | 1 |
| C | 12.3303 | 1 | 0.1667 | 1 | -1.2429 | 1 |
| C | 10.9402 | 1 | 0.0112 | 1 | -1.1949 | 1 |
| H | 10.3789 | 1 | 0.0930 | 1 | 2.1083 | 1 |
| H | 12.8890 | 1 | 0.4126 | 1 | 2.1211 | 1 |
| H | 14.1433 | 1 | 0.4557 | 1 | -0.0737 | 1 |
| H | 12.8361 | 1 | 0.1706 | 1 | -2.2219 | 1 |
| H | 10.3238 | 1 | -0.1060 | 1 | -2.1104 | 1 |

***********************************************

AM1 1SCF LET PRECISE POLAR GRAD XYZ

P10

| N | 6.9696 | 1 | 1.4779 | 1 | 0.0861 | 1 |
| --- | --- | --- | --- | --- | --- | --- |
| C | 6.6838 | 1 | 2.8341 | 1 | -0.1163 | 1 |
| C | 7.8957 | 1 | 3.4824 | 1 | -0.4856 | 1 |
| C | 8.9154 | 1 | 2.5072 | 1 | -0.5031 | 1 |
| C | 8.3165 | 1 | 1.2575 | 1 | -0.1595 | 1 |
| N | 4.0733 | 1 | -1.5827 | 1 | -0.0135 | 1 |
| C | 2.6591 | 1 | -1.3519 | 1 | -0.0211 | 1 |
| C | 2.0403 | 1 | -2.6826 | 1 | -0.0784 | 1 |
| C | 3.0489 | 1 | -3.6265 | 1 | -0.0897 | 1 |
| C | 4.3255 | 1 | -2.9184 | 1 | -0.0542 | 1 |
| N | 6.9975 | 1 | -1.4998 | 1 | 0.0207 | 1 |
| C | 8.3439 | 1 | -1.2724 | 1 | -0.0355 | 1 |
| C | 9.0888 | 1 | -2.5813 | 1 | -0.1383 | 1 |
| C | 8.1514 | 1 | -3.5604 | 1 | -0.1619 | 1 |
| C | 6.8113 | 1 | -2.8823 | 1 | -0.0465 | 1 |
| N | 4.0082 | 1 | 1.3833 | 1 | -0.0502 | 1 |
| C | 4.1952 | 1 | 2.7641 | 1 | 0.1800 | 1 |
| C | 2.9041 | 1 | 3.3536 | 1 | 0.6067 | 1 |
| C | 1.9857 | 1 | 2.3410 | 1 | 0.6139 | 1 |
| C | 2.7058 | 1 | 1.1147 | 1 | 0.1836 | 1 |
| C | 5.3848 | 1 | 3.4720 | 1 | 0.0355 | 1 |
| C | 8.9786 | 1 | -0.0249 | 1 | -0.0595 | 1 |
| C | 5.6128 | 1 | -3.5625 | 1 | -0.0534 | 1 |
| C | 2.0307 | 1 | -0.1440 | 1 | 0.0553 | 1 |
| S | 0.0000 | 1 | 0.0000 | 1 | 0.0000 | 1 |
| O | -0.2470 | 1 | 0.4373 | 1 | 1.2907 | 1 |
| O | -0.1592 | 1 | 0.9224 | 1 | -1.0167 | 1 |
| O | -0.3707 | 1 | -1.3049 | 1 | -0.2861 | 1 |
| N | 5.3974 | 1 | 4.8670 | 1 | 0.0000 | 1 |
| C | 6.2311 | 1 | 5.6091 | 1 | 0.9053 | 1 |
| C | 4.3339 | 1 | 5.6073 | 1 | -0.6209 | 1 |
| C | 5.5675 | 1 | -5.0137 | 1 | -0.1157 | 1 |
| C | 6.2199 | 1 | -5.8769 | 1 | 0.6976 | 1 |
| C | 6.1083 | 1 | -7.2835 | 1 | 0.4957 | 1 |
| N | 6.0216 | 1 | -8.4312 | 1 | 0.3287 | 1 |
| C | 7.0307 | 1 | -5.4875 | 1 | 1.8005 | 1 |
| N | 7.6855 | 1 | -5.1857 | 1 | 2.7137 | 1 |
| H | 6.2983 | 1 | 0.7787 | 1 | 0.2993 | 1 |
| H | 8.0091 | 1 | 4.5361 | 1 | -0.7294 | 1 |
| H | 9.9594 | 1 | 2.6984 | 1 | -0.7224 | 1 |
| H | 4.7542 | 1 | -0.8570 | 1 | -0.0087 | 1 |
| H | 0.9561 | 1 | -2.8539 | 1 | -0.1056 | 1 |
| H | 2.9476 | 1 | -4.7088 | 1 | -0.1087 | 1 |
| H | 10.1676 | 1 | -2.6810 | 1 | -0.2094 | 1 |
| H | 8.2775 | 1 | -4.6367 | 1 | -0.2605 | 1 |
| H | 2.7534 | 1 | 4.3877 | 1 | 0.9018 | 1 |
| H | 0.9289 | 1 | 2.3688 | 1 | 0.8843 | 1 |
| H | 5.6040 | 1 | 6.0996 | 1 | 1.7009 | 1 |
| H | 6.7706 | 1 | 6.4125 | 1 | 0.3346 | 1 |
| H | 6.9821 | 1 | 4.9398 | 1 | 1.4002 | 1 |
| H | 4.7988 | 1 | 6.3969 | 1 | -1.2737 | 1 |
| H | 3.6841 | 1 | 6.1214 | 1 | 0.1391 | 1 |
| H | 3.6993 | 1 | 4.9350 | 1 | -1.2571 | 1 |
| H | 4.9070 | 1 | -5.4248 | 1 | -0.9062 | 1 |
| N | 10.4060 | 1 | 0.0000 | 1 | 0.0000 | 1 |
| C | 11.0526 | 1 | -0.5647 | 1 | 1.0706 | 1 |
| C | 12.4497 | 1 | -0.5674 | 1 | 1.1536 | 1 |
| C | 13.2050 | 1 | 0.0258 | 1 | 0.1390 | 1 |
| C | 12.5423 | 1 | 0.5937 | 1 | -0.9512 | 1 |
| C | 11.1435 | 1 | 0.5591 | 1 | -1.0097 | 1 |
| H | 10.4109 | 1 | -1.0107 | 1 | 1.8584 | 1 |
| H | 12.9304 | 1 | -1.0331 | 1 | 2.0290 | 1 |
| H | 14.3056 | 1 | 0.0426 | 1 | 0.1968 | 1 |
| H | 13.0983 | 1 | 1.0634 | 1 | -1.7780 | 1 |
| H | 10.5747 | 1 | 0.9701 | 1 | -1.8704 | 1 |

**********************************************

AM1 1SCF LET PRECISE POLAR GRAD XYZ

P11

| N | 6.5221 | 1 | 1.5374 | 1 | 0.2000 | 1 |
| --- | --- | --- | --- | --- | --- | --- |
| C | 6.1978 | 1 | 2.8030 | 1 | -0.2977 | 1 |
| C | 7.2740 | 1 | 3.2506 | 1 | -1.1090 | 1 |
| C | 8.2528 | 1 | 2.2289 | 1 | -1.1177 | 1 |
| C | 7.7629 | 1 | 1.1690 | 1 | -0.3052 | 1 |
| N | 3.5668 | 1 | -1.5164 | 1 | 0.2081 | 1 |
| C | 2.1804 | 1 | -1.2381 | 1 | 0.0557 | 1 |
| C | 1.5051 | 1 | -2.5279 | 1 | -0.0568 | 1 |
| C | 2.4675 | 1 | -3.5215 | 1 | 0.0475 | 1 |
| C | 3.7569 | 1 | -2.8693 | 1 | 0.2185 | 1 |
| N | 6.4636 | 1 | -1.5132 | 1 | 0.1466 | 1 |
| C | 7.8152 | 1 | -1.2963 | 1 | 0.2097 | 1 |
| C | 8.5311 | 1 | -2.5752 | 1 | 0.5624 | 1 |
| C | 7.5840 | 1 | -3.5411 | 1 | 0.6550 | 1 |
| C | 6.2581 | 1 | -2.8730 | 1 | 0.3817 | 1 |
| N | 3.5497 | 1 | 1.4915 | 1 | -0.0479 | 1 |
| C | 3.7508 | 1 | 2.8735 | 1 | 0.1701 | 1 |
| C | 2.4729 | 1 | 3.4801 | 1 | 0.6052 | 1 |
| C | 1.5356 | 1 | 2.4814 | 1 | 0.6073 | 1 |
| C | 2.2431 | 1 | 1.2491 | 1 | 0.1883 | 1 |
| C | 4.9611 | 1 | 3.5357 | 1 | -0.0314 | 1 |
| C | 8.4505 | 1 | -0.0717 | 1 | -0.0124 | 1 |
| C | 5.0357 | 1 | -3.5192 | 1 | 0.3900 | 1 |
| C | 1.5605 | 1 | -0.0097 | 1 | 0.0688 | 1 |
| C | 0.0000 | 1 | 0.0000 | 1 | 0.0000 | 1 |
| O | -0.5006 | 1 | -0.5599 | 1 | -1.0013 | 1 |
| O | -0.5854 | 1 | 0.5393 | 1 | 0.9658 | 1 |
| N | 5.0509 | 1 | 4.9131 | 1 | 0.0000 | 1 |
| C | 3.9919 | 1 | 5.7606 | 1 | -0.4776 | 1 |
| C | 6.2559 | 1 | 5.5871 | 1 | 0.3972 | 1 |
| N | 5.0050 | 1 | -4.9903 | 1 | 0.5894 | 1 |
| O | 4.1179 | 1 | -5.4843 | 1 | 1.2297 | 1 |
| O | 5.8803 | 1 | -5.6629 | 1 | 0.1050 | 1 |
| H | 5.8966 | 1 | 0.9391 | 1 | 0.6844 | 1 |
| H | 7.3189 | 1 | 4.1955 | 1 | -1.6441 | 1 |
| H | 9.1871 | 1 | 2.2347 | 1 | -1.6689 | 1 |
| H | 4.2767 | 1 | -0.8206 | 1 | 0.2345 | 1 |
| H | 0.4239 | 1 | -2.6099 | 1 | -0.2152 | 1 |
| H | 2.3161 | 1 | -4.5996 | 1 | 0.0312 | 1 |
| H | 9.5987 | 1 | -2.6660 | 1 | 0.7404 | 1 |
| H | 7.7016 | 1 | -4.6031 | 1 | 0.8749 | 1 |
| H | 2.3404 | 1 | 4.5134 | 1 | 0.9099 | 1 |
| H | 0.4760 | 1 | 2.4957 | 1 | 0.8739 | 1 |
| H | 4.4286 | 1 | 6.5497 | 1 | -1.1497 | 1 |
| H | 3.2375 | 1 | 5.1669 | 1 | -1.0598 | 1 |
| H | 3.4827 | 1 | 6.2717 | 1 | 0.3842 | 1 |
| H | 5.9894 | 1 | 6.3977 | 1 | 1.1301 | 1 |
| H | 6.9727 | 1 | 4.8772 | 1 | 0.8863 | 1 |
| H | 6.7576 | 1 | 6.0616 | 1 | -0.4902 | 1 |
| N | 9.8719 | 1 | 0.0000 | 1 | 0.0000 | 1 |
| C | 10.5049 | 1 | 0.9929 | 1 | 0.7059 | 1 |
| C | 11.9002 | 1 | 1.0812 | 1 | 0.7411 | 1 |
| C | 12.6732 | 1 | 0.1460 | 1 | 0.0475 | 1 |
| C | 12.0260 | 1 | -0.8522 | 1 | -0.6838 | 1 |
| C | 10.6270 | 1 | -0.9020 | 1 | -0.7063 | 1 |
| H | 9.8505 | 1 | 1.7142 | 1 | 1.2370 | 1 |
| H | 12.3682 | 1 | 1.8892 | 1 | 1.3253 | 1 |
| H | 13.7735 | 1 | 0.1983 | 1 | 0.0730 | 1 |
| H | 12.5942 | 1 | -1.6016 | 1 | -1.2573 | 1 |
| H | 10.0742 | 1 | -1.6594 | 1 | -1.2998 | 1 |

**********************************************

AM1 1SCF LET PRECISE POLAR GRAD XYZ

P12

| N | 6.5382 | 1 | 1.5745 | 1 | 0.2926 | 1 |
| --- | --- | --- | --- | --- | --- | --- |
| C | 6.1989 | 1 | 2.8297 | 1 | -0.2322 | 1 |
| C | 7.2696 | 1 | 3.2634 | 1 | -1.0616 | 1 |
| C | 8.2539 | 1 | 2.2517 | 1 | -1.0510 | 1 |
| C | 7.7774 | 1 | 1.2028 | 1 | -0.2085 | 1 |
| N | 3.5770 | 1 | -1.4575 | 1 | 0.3287 | 1 |
| C | 2.1971 | 1 | -1.2156 | 1 | 0.1224 | 1 |
| C | 1.5485 | 1 | -2.5120 | 1 | 0.0319 | 1 |
| C | 2.5278 | 1 | -3.4871 | 1 | 0.2147 | 1 |
| C | 3.7908 | 1 | -2.8060 | 1 | 0.4072 | 1 |
| N | 6.4879 | 1 | -1.4507 | 1 | 0.3314 | 1 |
| C | 7.8166 | 1 | -1.2325 | 1 | 0.4360 | 1 |
| C | 8.5137 | 1 | -2.4588 | 1 | 0.9689 | 1 |
| C | 7.5601 | 1 | -3.4136 | 1 | 1.1203 | 1 |
| C | 6.2583 | 1 | -2.7977 | 1 | 0.7007 | 1 |
| N | 3.5480 | 1 | 1.5178 | 1 | -0.0061 | 1 |
| C | 3.7398 | 1 | 2.8890 | 1 | 0.2081 | 1 |
| C | 2.4619 | 1 | 3.4994 | 1 | 0.6257 | 1 |
| C | 1.5181 | 1 | 2.5025 | 1 | 0.6064 | 1 |
| C | 2.2275 | 1 | 1.2712 | 1 | 0.2072 | 1 |
| C | 4.9602 | 1 | 3.5570 | 1 | 0.0052 | 1 |
| C | 8.4784 | 1 | -0.0231 | 1 | 0.1055 | 1 |
| C | 5.0553 | 1 | -3.4499 | 1 | 0.6901 | 1 |
| C | 1.5585 | 1 | 0.0156 | 1 | 0.0945 | 1 |
| C | 0.0000 | 1 | 0.0000 | 1 | 0.0000 | 1 |
| O | -0.6081 | 1 | 0.5487 | 1 | 0.9461 | 1 |
| O | -0.4731 | 1 | -0.5879 | 1 | -0.9983 | 1 |
| N | 5.0337 | 1 | 4.9307 | 1 | 0.0000 | 1 |
| C | 6.2371 | 1 | 5.6320 | 1 | 0.3605 | 1 |
| C | 3.9515 | 1 | 5.7614 | 1 | -0.4598 | 1 |
| C | 4.9402 | 1 | -4.8626 | 1 | 1.0232 | 1 |
| C | 5.6262 | 1 | -5.8769 | 1 | 0.4501 | 1 |
| C | 6.5677 | 1 | -5.7086 | 1 | -0.6044 | 1 |
| N | 7.3317 | 1 | -5.5812 | 1 | -1.4720 | 1 |
| C | 5.4135 | 1 | -7.2223 | 1 | 0.8702 | 1 |
| N | 5.2368 | 1 | -8.3199 | 1 | 1.2121 | 1 |
| H | 5.9174 | 1 | 0.9872 | 1 | 0.7945 | 1 |
| H | 7.3033 | 1 | 4.1929 | 1 | -1.6248 | 1 |
| H | 9.1832 | 1 | 2.2476 | 1 | -1.6107 | 1 |
| H | 4.2757 | 1 | -0.7503 | 1 | 0.3546 | 1 |
| H | 0.4766 | 1 | -2.6223 | 1 | -0.1648 | 1 |
| H | 2.4041 | 1 | -4.5665 | 1 | 0.2056 | 1 |
| H | 7.6520 | 1 | -4.4350 | 1 | 1.4848 | 1 |
| H | 2.3238 | 1 | 4.5291 | 1 | 0.9388 | 1 |
| H | 0.4539 | 1 | 2.5248 | 1 | 0.8522 | 1 |
| H | 5.9702 | 1 | 6.4533 | 1 | 1.0811 | 1 |
| H | 6.9743 | 1 | 4.9439 | 1 | 0.8512 | 1 |
| H | 6.7122 | 1 | 6.0944 | 1 | -0.5471 | 1 |
| H | 4.3685 | 1 | 6.5646 | 1 | -1.1280 | 1 |
| H | 3.2058 | 1 | 5.1575 | 1 | -1.0429 | 1 |
| H | 3.4396 | 1 | 6.2549 | 1 | 0.4106 | 1 |
| H | 4.1848 | 1 | -5.0937 | 1 | 1.8014 | 1 |
| H | 9.5693 | 1 | -2.5146 | 1 | 1.2198 | 1 |
| N | 9.8830 | 1 | 0.0000 | 1 | 0.0000 | 1 |
| C | 10.5995 | 1 | 1.0921 | 1 | 0.4345 | 1 |
| C | 11.9914 | 1 | 1.1436 | 1 | 0.3226 | 1 |
| C | 12.6879 | 1 | 0.0640 | 1 | -0.2259 | 1 |
| C | 11.9623 | 1 | -1.0409 | 1 | -0.6722 | 1 |
| C | 10.5667 | 1 | -1.0486 | 1 | -0.5714 | 1 |
| H | 10.0129 | 1 | 1.9242 | 1 | 0.8728 | 1 |
| H | 12.5201 | 1 | 2.0408 | 1 | 0.6806 | 1 |
| H | 13.7852 | 1 | 0.0879 | 1 | -0.3102 | 1 |
| H | 12.4651 | 1 | -1.9098 | 1 | -1.1255 | 1 |
| H | 9.9588 | 1 | -1.8861 | 1 | -0.9693 | 1 |

**********************************************

AM1 1SCF LET PRECISE POLAR GRAD XYZ

P13

| N | 6.8643 | 1 | 1.4852 | 1 | -0.1035 | 1 |
| --- | --- | --- | --- | --- | --- | --- |
| C | 6.6113 | 1 | 2.8554 | 1 | -0.0900 | 1 |
| C | 7.8552 | 1 | 3.5416 | 1 | -0.1672 | 1 |
| C | 8.8710 | 1 | 2.5626 | 1 | -0.2459 | 1 |
| C | 8.2338 | 1 | 1.2869 | 1 | -0.2143 | 1 |
| N | 3.9571 | 1 | -1.3824 | 1 | -1.1141 | 1 |
| C | 2.5499 | 1 | -1.1976 | 1 | -0.8589 | 1 |
| C | 1.9357 | 1 | -2.5270 | 1 | -1.0800 | 1 |
| C | 2.9274 | 1 | -3.4129 | 1 | -1.4132 | 1 |
| C | 4.2113 | 1 | -2.6876 | 1 | -1.3997 | 1 |
| N | 6.9067 | 1 | -1.3635 | 1 | -0.9397 | 1 |
| C | 8.2673 | 1 | -1.1957 | 1 | -0.6658 | 1 |
| C | 8.9748 | 1 | -2.5117 | 1 | -0.8226 | 1 |
| C | 8.0439 | 1 | -3.4140 | 1 | -1.2204 | 1 |
| C | 6.7210 | 1 | -2.6801 | 1 | -1.2650 | 1 |
| N | 3.9065 | 1 | 1.4291 | 1 | -0.2689 | 1 |
| C | 4.0994 | 1 | 2.8385 | 1 | -0.1521 | 1 |
| C | 2.7672 | 1 | 3.5037 | 1 | -0.1923 | 1 |
| C | 1.8373 | 1 | 2.5193 | 1 | -0.3357 | 1 |
| C | 2.5906 | 1 | 1.2208 | 1 | -0.3716 | 1 |
| C | 5.3043 | 1 | 3.4669 | 1 | -0.0458 | 1 |
| C | 8.8756 | 1 | -0.0085 | 1 | -0.3057 | 1 |
| C | 5.4957 | 1 | -3.2931 | 1 | -1.5655 | 1 |
| C | 1.9251 | 1 | -0.0549 | 1 | -0.4930 | 1 |
| N | 10.2809 | 1 | 0.0000 | 1 | 0.0000 | 1 |
| C | 10.7057 | 1 | 0.5085 | 1 | 1.2002 | 1 |
| C | 12.0670 | 1 | 0.5513 | 1 | 1.5236 | 1 |
| C | 13.0110 | 1 | 0.0717 | 1 | 0.6115 | 1 |
| C | 12.5708 | 1 | -0.4366 | 1 | -0.6136 | 1 |
| C | 11.2014 | 1 | -0.4562 | 1 | -0.9058 | 1 |
| S | 0.0000 | 1 | 0.0000 | 1 | 0.0000 | 1 |
| O | -0.3682 | 1 | -1.3362 | 1 | -0.0780 | 1 |
| O | -0.5031 | 1 | 0.8327 | 1 | -0.9899 | 1 |
| O | 0.0926 | 1 | 0.5402 | 1 | 1.2733 | 1 |
| O | 5.3497 | 1 | 4.8579 | 1 | 0.0000 | 1 |
| C | 5.0499 | 1 | 5.3943 | 1 | 1.2919 | 1 |
| N | 5.4975 | 1 | -4.6940 | 1 | -2.0431 | 1 |
| O | 6.2783 | 1 | -5.4850 | 1 | -1.5762 | 1 |
| O | 4.7182 | 1 | -5.0218 | 1 | -2.8977 | 1 |
| H | 6.1741 | 1 | 0.7705 | 1 | -0.0936 | 1 |
| H | 4.6320 | 1 | -0.6566 | 1 | -1.0393 | 1 |
| H | 7.9675 | 1 | 4.6230 | 1 | -0.1796 | 1 |
| H | 9.9348 | 1 | 2.7499 | 1 | -0.3431 | 1 |
| H | 0.8586 | 1 | -2.7176 | 1 | -0.9737 | 1 |
| H | 2.8246 | 1 | -4.4679 | 1 | -1.6665 | 1 |
| H | 10.0300 | 1 | -2.6821 | 1 | -0.6296 | 1 |
| H | 8.1718 | 1 | -4.4745 | 1 | -1.4440 | 1 |
| H | 2.6390 | 1 | 4.5815 | 1 | -0.1388 | 1 |
| H | 0.7502 | 1 | 2.5895 | 1 | -0.4226 | 1 |
| H | 9.9167 | 1 | 0.8862 | 1 | 1.8857 | 1 |
| H | 12.3708 | 1 | 0.9640 | 1 | 2.4992 | 1 |
| H | 14.0868 | 1 | 0.0975 | 1 | 0.8527 | 1 |
| H | 13.2823 | 1 | -0.8166 | 1 | -1.3642 | 1 |
| H | 10.8066 | 1 | -0.8303 | 1 | -1.8741 | 1 |
| H | 5.0378 | 1 | 6.4999 | 1 | 1.1194 | 1 |
| H | 5.8527 | 1 | 5.1118 | 1 | 2.0158 | 1 |
| H | 4.0550 | 1 | 5.0320 | 1 | 1.6476 | 1 |

**********************************************

AM1 1SCF LET PRECISE POLAR GRAD XYZ

P14

| N | 6.9988 | 1 | 1.4484 | 1 | 0.0915 | 1 |
| --- | --- | --- | --- | --- | --- | --- |
| C | 6.7202 | 1 | 2.8152 | 1 | -0.0141 | 1 |
| C | 7.9575 | 1 | 3.5084 | 1 | -0.1288 | 1 |
| C | 8.9874 | 1 | 2.5441 | 1 | -0.1037 | 1 |
| C | 8.3704 | 1 | 1.2620 | 1 | 0.0375 | 1 |
| N | 4.0715 | 1 | -1.5191 | 1 | 0.4621 | 1 |
| C | 2.6547 | 1 | -1.3090 | 1 | 0.3506 | 1 |
| C | 2.0536 | 1 | -2.6551 | 1 | 0.4107 | 1 |
| C | 3.0695 | 1 | -3.5768 | 1 | 0.5387 | 1 |
| C | 4.3396 | 1 | -2.8472 | 1 | 0.5642 | 1 |
| N | 7.0356 | 1 | -1.4563 | 1 | 0.3218 | 1 |
| C | 8.3885 | 1 | -1.2587 | 1 | 0.2562 | 1 |
| C | 9.1116 | 1 | -2.5724 | 1 | 0.4256 | 1 |
| C | 8.1584 | 1 | -3.5217 | 1 | 0.6001 | 1 |
| C | 6.8284 | 1 | -2.8184 | 1 | 0.5354 | 1 |
| N | 4.0028 | 1 | 1.3674 | 1 | 0.1408 | 1 |
| C | 4.2029 | 1 | 2.7710 | 1 | 0.0610 | 1 |
| C | 2.8765 | 1 | 3.4425 | 1 | 0.0577 | 1 |
| C | 1.9353 | 1 | 2.4572 | 1 | 0.1246 | 1 |
| C | 2.6774 | 1 | 1.1578 | 1 | 0.1677 | 1 |
| C | 5.4119 | 1 | 3.4082 | 1 | -0.0074 | 1 |
| C | 9.0305 | 1 | -0.0240 | 1 | 0.1023 | 1 |
| C | 5.6250 | 1 | -3.4726 | 1 | 0.6635 | 1 |
| C | 2.0112 | 1 | -0.1181 | 1 | 0.2125 | 1 |
| S | 0.0000 | 1 | 0.0000 | 1 | 0.0000 | 1 |
| O | -0.3265 | 1 | 0.7641 | 1 | 1.1066 | 1 |
| O | -0.3718 | 1 | -1.3347 | 1 | 0.0377 | 1 |
| O | -0.0703 | 1 | 0.6245 | 1 | -1.2332 | 1 |
| O | 5.4122 | 1 | 4.8016 | 1 | 0.0000 | 1 |
| C | 5.4724 | 1 | 5.3807 | 1 | -1.3064 | 1 |
| C | 5.6108 | 1 | -4.9234 | 1 | 0.8534 | 1 |
| C | 5.5710 | 1 | -5.5455 | 1 | 2.0505 | 1 |
| C | 5.5474 | 1 | -4.8573 | 1 | 3.2971 | 1 |
| N | 5.5290 | 1 | -4.2971 | 1 | 4.3158 | 1 |
| C | 5.5467 | 1 | -6.9692 | 1 | 2.1340 | 1 |
| N | 5.5269 | 1 | -8.1300 | 1 | 2.2008 | 1 |
| H | 6.3179 | 1 | 0.7313 | 1 | 0.1807 | 1 |
| H | 8.0613 | 1 | 4.5877 | 1 | -0.2079 | 1 |
| H | 10.0488 | 1 | 2.7485 | 1 | -0.1983 | 1 |
| H | 4.7440 | 1 | -0.7862 | 1 | 0.4541 | 1 |
| H | 0.9724 | 1 | -2.8408 | 1 | 0.3559 | 1 |
| H | 2.9955 | 1 | -4.6591 | 1 | 0.6116 | 1 |
| H | 10.1910 | 1 | -2.6929 | 1 | 0.4279 | 1 |
| H | 8.2612 | 1 | -4.5925 | 1 | 0.7628 | 1 |
| H | 2.7579 | 1 | 4.5221 | 1 | 0.0182 | 1 |
| H | 0.8469 | 1 | 2.5370 | 1 | 0.1495 | 1 |
| H | 4.5893 | 1 | 5.0626 | 1 | -1.9114 | 1 |
| H | 5.4459 | 1 | 6.4807 | 1 | -1.1050 | 1 |
| H | 6.4248 | 1 | 5.0894 | 1 | -1.8138 | 1 |
| H | 5.6225 | 1 | -5.5207 | 1 | -0.0786 | 1 |
| N | 10.4536 | 1 | 0.0000 | 1 | 0.0000 | 1 |
| C | 11.1984 | 1 | 0.7654 | 1 | 0.8599 | 1 |
| C | 12.5933 | 1 | 0.8242 | 1 | 0.7521 | 1 |
| C | 13.2443 | 1 | 0.0853 | 1 | -0.2380 | 1 |
| C | 12.4816 | 1 | -0.7008 | 1 | -1.1052 | 1 |
| C | 11.0883 | 1 | -0.7244 | 1 | -0.9766 | 1 |
| H | 10.6361 | 1 | 1.3290 | 1 | 1.6353 | 1 |
| H | 13.1554 | 1 | 1.4532 | 1 | 1.4606 | 1 |
| H | 14.3415 | 1 | 0.1224 | 1 | -0.3344 | 1 |
| H | 12.9543 | 1 | -1.2970 | 1 | -1.9017 | 1 |
| H | 10.4400 | 1 | -1.3150 | 1 | -1.6563 | 1 |

**********************************************

AM1 1SCF LET PRECISE POLAR GRAD XYZ

P15

| N | 6.5340 | 1 | 1.5238 | 1 | -.0625 | 1 |
| --- | --- | --- | --- | --- | --- | --- |
| C | 6.2560 | 1 | 2.8621 | 1 | .2347 | 1 |
| C | 7.4246 | 1 | 3.4421 | 1 | .7939 | 1 |
| C | 8.4154 | 1 | 2.4327 | 1 | .8479 | 1 |
| C | 7.8375 | 1 | 1.2441 | 1 | .3210 | 1 |
| N | 3.5796 | 1 | -1.5007 | 1 | .2919 | 1 |
| C | 2.1794 | 1 | -1.2180 | 1 | .2632 | 1 |
| C | 1.4973 | 1 | -2.5094 | 1 | .4344 | 1 |
| C | 2.4614 | 1 | -3.4900 | 1 | .5388 | 1 |
| C | 3.7730 | 1 | -2.8434 | 1 | .4403 | 1 |
| N | 6.4748 | 1 | -1.4886 | 1 | .2545 | 1 |
| C | 7.8430 | 1 | -1.2762 | 1 | .1767 | 1 |
| C | 8.5646 | 1 | -2.5977 | 1 | .1618 | 1 |
| C | 7.6175 | 1 | -3.5609 | 1 | .2729 | 1 |
| C | 6.2808 | 1 | -2.8522 | 1 | .3210 | 1 |
| N | 3.5591 | 1 | 1.4601 | 1 | .0909 | 1 |
| C | 3.7678 | 1 | 2.8604 | 1 | -.0655 | 1 |
| C | 2.4543 | 1 | 3.5197 | 1 | -.2957 | 1 |
| C | 1.5095 | 1 | 2.5361 | 1 | -.2682 | 1 |
| C | 2.2404 | 1 | 1.2564 | 1 | -.0186 | 1 |
| C | 4.9757 | 1 | 3.4966 | 1 | .0252 | 1 |
| C | 8.4754 | 1 | -.0457 | 1 | .1596 | 1 |
| C | 5.0517 | 1 | -3.5010 | 1 | .4384 | 1 |
| C | 1.5573 | 1 | -.0120 | 1 | .0986 | 1 |
| N | 9.9060 | 1 | .0000 | 1 | .0000 | 1 |
| C | 10.7111 | 1 | .2670 | 1 | 1.0728 | 1 |
| C | 12.1029 | 1 | .3361 | 1 | .9280 | 1 |
| C | 12.6780 | 1 | .1302 | 1 | -.3289 | 1 |
| C | 11.8474 | 1 | -.1413 | 1 | -1.4199 | 1 |
| C | 10.4601 | 1 | -.1998 | 1 | -1.2353 | 1 |
| C | .0000 | 1 | .0000 | 1 | .0000 | 1 |
| O | -.4747 | 1 | .5800 | 1 | -1.0028 | 1 |
| O | -.6151 | 1 | -.5912 | 1 | .9163 | 1 |
| O | 4.9224 | 1 | 4.8780 | 1 | .0000 | 1 |
| C | 5.9097 | 1 | 5.5389 | 1 | -.7933 | 1 |
| N | 5.0396 | 1 | -4.9781 | 1 | .5557 | 1 |
| O | 5.8252 | 1 | -5.6255 | 1 | -.0906 | 1 |
| O | 4.2587 | 1 | -5.5096 | 1 | 1.2979 | 1 |
| H | 5.8688 | 1 | .8552 | 1 | -.3729 | 1 |
| H | 7.5177 | 1 | 4.4677 | 1 | 1.1406 | 1 |
| H | 9.4216 | 1 | 2.5449 | 1 | 1.2361 | 1 |
| H | 4.2894 | 1 | -.8056 | 1 | .2412 | 1 |
| H | .4040 | 1 | -2.5823 | 1 | .4868 | 1 |
| H | 2.3118 | 1 | -4.5580 | 1 | .6948 | 1 |
| H | 9.6418 | 1 | -2.7149 | 1 | .0952 | 1 |
| H | 7.7419 | 1 | -4.6445 | 1 | .3057 | 1 |
| H | 2.3482 | 1 | 4.5909 | 1 | -.4439 | 1 |
| H | .4279 | 1 | 2.5727 | 1 | -.4175 | 1 |
| H | 10.2025 | 1 | .4245 | 1 | 2.0480 | 1 |
| H | 12.7236 | 1 | .5507 | 1 | 1.8127 | 1 |
| H | 13.7723 | 1 | .1821 | 1 | -.4589 | 1 |
| H | 12.2604 | 1 | -.3061 | 1 | -2.4279 | 1 |
| H | 9.7576 | 1 | -.4060 | 1 | -2.0695 | 1 |
| H | 5.3471 | 1 | 6.3577 | 1 | -1.3108 | 1 |
| H | 6.6761 | 1 | 5.9705 | 1 | -.1034 | 1 |
| H | 6.3877 | 1 | 4.8566 | 1 | -1.5342 | 1 |

**********************************************

AM1 1SCF LET PRECISE POLAR GRAD XYZ

P16

| N | 6.5110 | 1 | 1.4975 | 1 | 0.0816 | 1 |
| --- | --- | --- | --- | --- | --- | --- |
| C | 6.2638 | 1 | 2.8741 | 1 | 0.1717 | 1 |
| C | 7.5119 | 1 | 3.5349 | 1 | 0.3582 | 1 |
| C | 8.5120 | 1 | 2.5430 | 1 | 0.4052 | 1 |
| C | 7.8660 | 1 | 1.2758 | 1 | 0.2421 | 1 |
| N | 3.5778 | 1 | -1.4155 | 1 | 0.6082 | 1 |
| C | 2.1915 | 1 | -1.1813 | 1 | 0.3697 | 1 |
| C | 1.5461 | 1 | -2.4976 | 1 | 0.3588 | 1 |
| C | 2.5248 | 1 | -3.4520 | 1 | 0.5745 | 1 |
| C | 3.7992 | 1 | -2.7555 | 1 | 0.7202 | 1 |
| N | 6.5123 | 1 | -1.4120 | 1 | 0.6238 | 1 |
| C | 7.8633 | 1 | -1.2403 | 1 | 0.5057 | 1 |
| C | 8.5674 | 1 | -2.5656 | 1 | 0.6578 | 1 |
| C | 7.6061 | 1 | -3.4920 | 1 | 0.8995 | 1 |
| C | 6.2844 | 1 | -2.7768 | 1 | 0.8278 | 1 |
| N | 3.5476 | 1 | 1.4948 | 1 | 0.1383 | 1 |
| C | 3.7534 | 1 | 2.8953 | 1 | 0.0563 | 1 |
| C | 2.4335 | 1 | 3.5665 | 1 | -0.0599 | 1 |
| C | 1.4848 | 1 | 2.5828 | 1 | -0.0363 | 1 |
| C | 2.2207 | 1 | 1.2933 | 1 | 0.0940 | 1 |
| C | 4.9797 | 1 | 3.5095 | 1 | 0.1000 | 1 |
| C | 8.5104 | 1 | -0.0202 | 1 | 0.2610 | 1 |
| C | 5.0666 | 1 | -3.4141 | 1 | 0.9027 | 1 |
| C | 1.5539 | 1 | 0.0166 | 1 | 0.1576 | 1 |
| C | 0.0000 | 1 | 0.0000 | 1 | 0.0000 | 1 |
| O | -0.6276 | 1 | 0.7912 | 1 | 0.7388 | 1 |
| O | -0.4580 | 1 | -0.8170 | 1 | -0.8310 | 1 |
| O | 5.0608 | 1 | 4.8934 | 1 | 0.0000 | 1 |
| C | 4.6283 | 1 | 5.5938 | 1 | 1.1709 | 1 |
| C | 4.9631 | 1 | -4.8378 | 1 | 1.1905 | 1 |
| C | 5.5167 | 1 | -5.8506 | 1 | 0.4859 | 1 |
| C | 6.2692 | 1 | -5.6776 | 1 | -0.7098 | 1 |
| N | 6.8724 | 1 | -5.5501 | 1 | -1.6963 | 1 |
| C | 5.3461 | 1 | -7.2029 | 1 | 0.9046 | 1 |
| N | 5.2083 | 1 | -8.3060 | 1 | 1.2468 | 1 |
| H | 5.8175 | 1 | 0.7962 | 1 | -0.0292 | 1 |
| H | 7.6349 | 1 | 4.6118 | 1 | 0.4476 | 1 |
| H | 9.5720 | 1 | 2.7057 | 1 | 0.5652 | 1 |
| H | 4.2663 | 1 | -0.7006 | 1 | 0.6722 | 1 |
| H | 0.4727 | 1 | -2.6165 | 1 | 0.1670 | 1 |
| H | 2.4139 | 1 | -4.5326 | 1 | 0.6144 | 1 |
| H | 9.6376 | 1 | -2.7249 | 1 | 0.5679 | 1 |
| H | 7.7062 | 1 | -4.5572 | 1 | 1.1002 | 1 |
| H | 2.3130 | 1 | 4.6406 | 1 | -0.1694 | 1 |
| H | 0.3942 | 1 | 2.6377 | 1 | -0.0716 | 1 |
| H | 3.6221 | 1 | 5.2431 | 1 | 1.5032 | 1 |
| H | 5.3815 | 1 | 5.4550 | 1 | 1.9843 | 1 |
| H | 4.5922 | 1 | 6.6609 | 1 | 0.8366 | 1 |
| H | 4.3336 | 1 | -5.0801 | 1 | 2.0713 | 1 |
| N | 9.9105 | 1 | 0.0000 | 1 | 0.0000 | 1 |
| C | 10.8091 | 1 | -0.5779 | 1 | 0.8584 | 1 |
| C | 12.1817 | 1 | -0.5721 | 1 | 0.5812 | 1 |
| C | 12.6554 | 1 | 0.0635 | 1 | -0.5679 | 1 |
| C | 11.7397 | 1 | 0.6852 | 1 | -1.4208 | 1 |
| C | 10.3738 | 1 | 0.6408 | 1 | -1.1230 | 1 |
| H | 10.3953 | 1 | -1.0334 | 1 | 1.7810 | 1 |
| H | 12.8699 | 1 | -1.0616 | 1 | 1.2883 | 1 |
| H | 13.7340 | 1 | 0.0796 | 1 | -0.7949 | 1 |
| H | 12.0697 | 1 | 1.2067 | 1 | -2.3333 | 1 |
| H | 9.6073 | 1 | 1.1197 | 1 | -1.7689 | 1 |

**********************************************

AM1 1SCF LET PRECISE POLAR GRAD XYZ

D1

| C | 2.75780 | 1 | -1.00770 | 1 | .23870 | 1 |
| --- | --- | --- | --- | --- | --- | --- |
| C | 1.80320 | 1 | -.02650 | 1 | .13260 | 1 |
| C | 2.89040 | 1 | 1.06070 | 1 | .10610 | 1 |
| C | 3.87160 | 1 | .07960 | 1 | .15910 | 1 |
| C | 2.83740 | 1 | 2.46610 | 1 | .07960 | 1 |
| S | .00000 | 1 | .00000 | 1 | .00000 | 1 |
| C | 2.78440 | 1 | -2.41310 | 1 | .45080 | 1 |
| N | 5.27700 | 1 | .00000 | 1 | .00000 | 1 |
| C | 1.90930 | 1 | -3.23520 | 1 | -.26520 | 1 |
| C | 3.65940 | 1 | -2.99650 | 1 | 1.37890 | 1 |
| C | 5.78090 | 1 | 1.14030 | 1 | -.84860 | 1 |
| C | 5.67480 | 1 | -1.27290 | 1 | -.68950 | 1 |
| C | 5.96650 | 1 | .07960 | 1 | 1.32590 | 1 |
| C | 1.88280 | 1 | 3.15560 | 1 | -.66290 | 1 |
| C | 3.73900 | 1 | 3.23520 | 1 | .87510 | 1 |
| C | 1.93580 | 1 | -4.61410 | 1 | -.07960 | 1 |
| C | 3.68600 | 1 | -4.37540 | 1 | 1.56450 | 1 |
| C | 2.83740 | 1 | -5.19750 | 1 | .82200 | 1 |
| N | 2.89040 | 1 | -6.65590 | 1 | .98120 | 1 |
| O | 2.14790 | 1 | -7.37190 | 1 | .34470 | 1 |
| O | 3.68600 | 1 | -7.13320 | 1 | 1.77670 | 1 |
| C | 1.82970 | 1 | 4.53450 | 1 | -.68950 | 1 |
| C | 3.68600 | 1 | 4.61410 | 1 | .87510 | 1 |
| C | 2.75780 | 1 | 5.33010 | 1 | .07960 | 1 |
| N | 2.75780 | 1 | 6.70900 | 1 | .00000 | 1 |
| C | 1.61760 | 1 | 7.37190 | 1 | -.60990 | 1 |
| C | 3.47380 | 1 | 7.45150 | 1 | 1.00770 | 1 |
| O | -.42430 | 1 | .26520 | 1 | 1.29940 | 1 |
| O | -.21210 | 1 | 1.06070 | 1 | -.92810 | 1 |
| O | -.29170 | 1 | -1.27280 | 1 | -.50380 | 1 |
| H | 1.19650 | 1 | -2.79490 | 1 | -.97800 | 1 |
| H | 4.33590 | 1 | -2.36240 | 1 | 1.97080 | 1 |
| H | 6.88210 | 1 | 1.06790 | 1 | -.96650 | 1 |
| H | 5.30800 | 1 | 1.10440 | 1 | -1.85200 | 1 |
| H | 5.53290 | 1 | 2.10950 | 1 | -.36800 | 1 |
| H | 6.77810 | 1 | -1.31410 | 1 | -.80340 | 1 |
| H | 5.34130 | 1 | -2.14770 | 1 | -.09340 | 1 |
| H | 5.20670 | 1 | -1.32240 | 1 | -1.69460 | 1 |
| H | 7.06580 | 1 | .01610 | 1 | 1.18650 | 1 |
| H | 5.72140 | 1 | 1.04060 | 1 | 1.82410 | 1 |
| H | 5.63690 | 1 | -.75740 | 1 | 1.97600 | 1 |
| H | 1.14370 | 1 | 2.59050 | 1 | -1.24980 | 1 |
| H | 4.49760 | 1 | 2.75050 | 1 | 1.50720 | 1 |
| H | 1.23950 | 1 | -5.24710 | 1 | -.64920 | 1 |
| H | 4.37750 | 1 | -4.81550 | 1 | 2.29800 | 1 |
| H | 1.05400 | 1 | 4.99570 | 1 | -1.31840 | 1 |
| H | 4.39590 | 1 | 5.15190 | 1 | 1.52050 | 1 |
| H | 1.76710 | 1 | 8.47170 | 1 | -.59840 | 1 |
| H | 1.50030 | 1 | 7.03530 | 1 | -1.66100 | 1 |
| H | .69180 | 1 | 7.12830 | 1 | -.04830 | 1 |
| H | 3.38370 | 1 | 8.54040 | 1 | .81260 | 1 |
| H | 3.05570 | 1 | 7.22950 | 1 | 2.01150 | 1 |
| H | 4.54760 | 1 | 7.17090 | 1 | .99470 | 1 |

*************************************************

AM1 LET PRECISE 1SCF POLAR GRAD XYZ

D2

| C | 3.74010 | 1 | 3.23170 | 1 | 0.86270 | 1 |
| --- | --- | --- | --- | --- | --- | --- |
| C | 3.70150 | 1 | 4.61420 | 1 | 0.86940 | 1 |
| C | 2.75650 | 1 | 5.31780 | 1 | 0.07160 | 1 |
| C | 1.83940 | 1 | 4.54630 | 1 | -0.68760 | 1 |
| N | 2.76980 | 1 | 6.71150 | 1 | 0.00000 | 1 |
| C | 1.65030 | 1 | 7.37400 | 1 | -0.61830 | 1 |
| C | 3.48870 | 1 | 7.44190 | 1 | 1.01040 | 1 |
| C | 2.84740 | 1 | 2.47450 | 1 | 0.08240 | 1 |
| C | 1.87680 | 1 | 3.16080 | 1 | -0.67140 | 1 |
| C | 2.88830 | 1 | 1.05020 | 1 | 0.09700 | 1 |
| C | 1.79580 | 1 | -0.03900 | 1 | 0.12610 | 1 |
| C | 3.85860 | 1 | 0.07190 | 1 | 0.14110 | 1 |
| C | 2.75160 | 1 | -1.00410 | 1 | 0.24020 | 1 |
| S | 0.00000 | 1 | 0.00000 | 1 | 0.00000 | 1 |
| C | 2.79000 | 1 | -2.42500 | 1 | 0.43020 | 1 |
| N | 5.28450 | 1 | 0.00000 | 1 | 0.00000 | 1 |
| C | 3.65380 | 1 | -3.00720 | 1 | 1.37160 | 1 |
| C | 1.91590 | 1 | -3.24740 | 1 | -0.30190 | 1 |
| C | 3.70030 | 1 | -4.38880 | 1 | 1.52620 | 1 |
| C | 1.95480 | 1 | -4.62860 | 1 | -0.13460 | 1 |
| C | 2.86720 | 1 | -5.21400 | 1 | 0.75680 | 1 |
| C | 2.89880 | 1 | -6.65920 | 1 | 0.88550 | 1 |
| C | 4.01020 | 1 | -7.41480 | 1 | 1.04490 | 1 |
| C | 5.33140 | 1 | -6.88570 | 1 | 1.07100 | 1 |
| C | 3.91810 | 1 | -8.83090 | 1 | 1.17410 | 1 |
| C | 5.78370 | 1 | 1.13460 | 1 | -0.84250 | 1 |
| C | 5.66860 | 1 | -1.27860 | 1 | -0.68160 | 1 |
| C | 5.94760 | 1 | 0.05930 | 1 | 1.34060 | 1 |
| O | -0.42540 | 1 | 0.19560 | 1 | 1.31590 | 1 |
| O | -0.27930 | 1 | -1.26250 | 1 | -0.55320 | 1 |
| O | -0.22800 | 1 | 1.07640 | 1 | -0.87540 | 1 |
| H | 4.27300 | 1 | -2.37040 | 1 | 2.01980 | 1 |
| H | 1.16280 | 1 | -2.78560 | 1 | -0.97460 | 1 |
| H | 1.11830 | 1 | 2.58800 | 1 | -1.24790 | 1 |
| H | 4.45870 | 1 | 2.71840 | 1 | 1.52100 | 1 |
| H | 4.37420 | 1 | -4.83250 | 1 | 2.27500 | 1 |
| H | 1.26010 | 1 | -5.26260 | 1 | -0.70750 | 1 |
| H | 1.91170 | 1 | -7.15920 | 1 | 0.82660 | 1 |
| H | 1.05960 | 1 | 5.03340 | 1 | -1.29370 | 1 |
| H | 4.40570 | 1 | 5.15940 | 1 | 1.51460 | 1 |
| H | 1.78140 | 1 | 8.48600 | 1 | -0.55430 | 1 |
| H | 1.60740 | 1 | 7.08650 | 1 | -1.70360 | 1 |
| H | 0.67500 | 1 | 7.09660 | 1 | -0.13270 | 1 |
| H | 3.32170 | 1 | 8.54340 | 1 | 0.88110 | 1 |
| H | 3.17080 | 1 | 7.15130 | 1 | 2.04890 | 1 |
| H | 4.58810 | 1 | 7.23810 | 1 | 0.89960 | 1 |
| N | 6.41360 | 1 | -6.45830 | 1 | 1.07500 | 1 |
| N | 3.84200 | 1 | -9.98670 | 1 | 1.27970 | 1 |
| H | 6.89670 | 1 | 1.05570 | 1 | -0.94130 | 1 |
| H | 5.29990 | 1 | 1.07700 | 1 | -1.85320 | 1 |
| H | 5.50690 | 1 | 2.10930 | 1 | -0.35910 | 1 |
| H | 6.77900 | 1 | -1.29230 | 1 | -0.83010 | 1 |
| H | 5.35300 | 1 | -2.14940 | 1 | -0.04700 | 1 |
| H | 5.14210 | 1 | -1.33560 | 1 | -1.67060 | 1 |
| H | 7.05590 | 1 | -0.04150 | 1 | 1.21020 | 1 |
| H | 5.70360 | 1 | 1.03900 | 1 | 1.82800 | 1 |
| H | 5.55770 | 1 | -0.77520 | 1 | 1.98010 | 1 |

**************************************************

AM1 PRECISE 1SCF LET POLAR GRAD XYZ

D3

| C | 2.58690 | 1 | 1.04110 | 1 | .09820 | 1 |
| --- | --- | --- | --- | --- | --- | --- |
| C | 1.50940 | 1 | -.07180 | 1 | .04720 | 1 |
| C | 2.47180 | 1 | -1.04240 | 1 | .04320 | 1 |
| C | 3.55680 | 1 | .06860 | 1 | .07280 | 1 |
| C | 2.44370 | 1 | -2.47080 | 1 | .09070 | 1 |
| C | .00000 | 1 | .00000 | 1 | .00000 | 1 |
| C | 2.44050 | 1 | 2.45770 | 1 | .11880 | 1 |
| C | 1.34920 | 1 | -3.07090 | 1 | .75050 | 1 |
| C | 3.40950 | 1 | -3.29850 | 1 | -.50130 | 1 |
| C | 1.25080 | 1 | -4.45360 | 1 | .85490 | 1 |
| C | 3.32660 | 1 | -4.68300 | 1 | -.40550 | 1 |
| C | 2.25260 | 1 | -5.26020 | 1 | .28860 | 1 |
| N | 2.17530 | 1 | -6.73710 | 1 | .41460 | 1 |
| C | 1.41160 | 1 | 3.04220 | 1 | -.64810 | 1 |
| C | 3.23000 | 1 | 3.29900 | 1 | .91820 | 1 |
| C | 1.23830 | 1 | 4.41570 | 1 | -.67750 | 1 |
| C | 3.05500 | 1 | 4.67250 | 1 | .91210 | 1 |
| C | 2.06680 | 1 | 5.27730 | 1 | .08800 | 1 |
| N | 1.95200 | 1 | 6.66560 | 1 | .00000 | 1 |
| C | .79260 | 1 | 7.21620 | 1 | -.65300 | 1 |
| C | 2.57670 | 1 | 7.47010 | 1 | 1.01650 | 1 |
| N | 4.99080 | 1 | .00000 | 1 | .00000 | 1 |
| C | 5.62810 | 1 | 1.30220 | 1 | .36800 | 1 |
| C | 5.39630 | 1 | -.33270 | 1 | -1.40600 | 1 |
| C | 5.50080 | 1 | -1.04740 | 1 | .94150 | 1 |
| O | -.50410 | 1 | .71570 | 1 | -.90210 | 1 |
| O | -.61670 | 1 | -.67320 | 1 | .86340 | 1 |
| H | .54650 | 1 | -2.42030 | 1 | 1.16580 | 1 |
| H | 4.23370 | 1 | -2.87140 | 1 | -1.08810 | 1 |
| H | .39110 | 1 | -4.91130 | 1 | 1.37530 | 1 |
| H | 4.09110 | 1 | -5.32330 | 1 | -.87680 | 1 |
| O | 1.25040 | 1 | -7.22930 | 1 | 1.00240 | 1 |
| O | 3.04970 | 1 | -7.40810 | 1 | -.06990 | 1 |
| H | 6.72460 | 1 | 1.24930 | 1 | .14000 | 1 |
| H | 5.15110 | 1 | 2.12970 | 1 | -.22390 | 1 |
| H | 5.47960 | 1 | 1.48770 | 1 | 1.46420 | 1 |
| H | 6.48070 | 1 | -.61230 | 1 | -1.42130 | 1 |
| H | 4.76780 | 1 | -1.18010 | 1 | -1.78590 | 1 |
| H | 5.21650 | 1 | .56360 | 1 | -2.05650 | 1 |
| H | 6.61940 | 1 | -1.07500 | 1 | .88680 | 1 |
| H | 5.16890 | 1 | -.79320 | 1 | 1.98270 | 1 |
| H | 5.07160 | 1 | -2.04540 | 1 | .65970 | 1 |
| H | .71610 | 1 | 2.38200 | 1 | -1.21310 | 1 |

*************************************************

AM1 1SCF LET PRECISE POLAR GRAD XYZ

D4

| C | 2.60060 | 1 | 1.04890 | 1 | -.04610 | 1 |
| --- | --- | --- | --- | --- | --- | --- |
| C | 1.50630 | 1 | -.04630 | 1 | -.10660 | 1 |
| C | 2.45180 | 1 | -1.02660 | 1 | -.17740 | 1 |
| C | 3.55720 | 1 | .05880 | 1 | -.10590 | 1 |
| C | 2.39780 | 1 | -2.45680 | 1 | -.22110 | 1 |
| N | 4.98950 | 1 | .00000 | 1 | .00000 | 1 |
| C | 1.49320 | 1 | -3.11310 | 1 | .63520 | 1 |
| C | 3.15450 | 1 | -3.22240 | 1 | -1.12180 | 1 |
| C | 1.40750 | 1 | -4.50260 | 1 | .63460 | 1 |
| C | 3.07430 | 1 | -4.60930 | 1 | -1.11240 | 1 |
| C | 2.20590 | 1 | -5.26930 | 1 | -.22480 | 1 |
| C | 2.19590 | 1 | -6.71830 | 1 | -.22640 | 1 |
| C | 1.14840 | 1 | -7.54020 | 1 | .01050 | 1 |
| C | -.18410 | 1 | -7.11980 | 1 | .27530 | 1 |
| C | 1.33460 | 1 | -8.95520 | 1 | -.01580 | 1 |
| C | 5.61730 | 1 | 1.06210 | 1 | -.84850 | 1 |
| C | 5.51290 | 1 | -1.32380 | 1 | -.45730 | 1 |
| C | 5.39630 | 1 | .18990 | 1 | 1.43150 | 1 |
| C | 2.48630 | 1 | 2.46430 | 1 | .01120 | 1 |
| C | .00000 | 1 | .00000 | 1 | .00000 | 1 |
| C | 1.33720 | 1 | 3.07200 | 1 | -.53980 | 1 |
| C | 3.44040 | 1 | 3.29780 | 1 | .61840 | 1 |
| C | 1.18150 | 1 | 4.44730 | 1 | -.53100 | 1 |
| C | 3.29030 | 1 | 4.67310 | 1 | .64860 | 1 |
| C | 2.15890 | 1 | 5.29550 | 1 | .05190 | 1 |
| N | 2.04390 | 1 | 6.68320 | 1 | .00000 | 1 |
| C | .79170 | 1 | 7.25620 | 1 | -.41950 | 1 |
| C | 2.88440 | 1 | 7.47860 | 1 | .85380 | 1 |
| O | -.50090 | 1 | -.73140 | 1 | .89160 | 1 |
| O | -.62050 | 1 | .75100 | 1 | -.79480 | 1 |
| H | .81730 | 1 | -2.50300 | 1 | 1.27140 | 1 |
| H | 3.78030 | 1 | -2.72690 | 1 | -1.87740 | 1 |
| H | .70340 | 1 | -4.99660 | 1 | 1.32310 | 1 |
| H | 3.67710 | 1 | -5.19620 | 1 | -1.82190 | 1 |
| H | 3.17440 | 1 | -7.18180 | 1 | -.46690 | 1 |
| N | -1.28710 | 1 | -6.81090 | 1 | .47920 | 1 |
| N | 1.48640 | 1 | -10.10820 | 1 | -.03630 | 1 |
| H | 6.73080 | 1 | 1.01280 | 1 | -.73730 | 1 |
| H | 5.24000 | 1 | 2.06940 | 1 | -.53000 | 1 |
| H | 5.32740 | 1 | .88960 | 1 | -1.91870 | 1 |
| H | 6.61540 | 1 | -1.36630 | 1 | -.25990 | 1 |
| H | 5.31750 | 1 | -1.43420 | 1 | -1.55600 | 1 |
| H | 4.98520 | 1 | -2.14270 | 1 | .10280 | 1 |
| H | 6.51370 | 1 | .22830 | 1 | 1.49850 | 1 |
| H | 4.99920 | 1 | -.66860 | 1 | 2.03540 | 1 |
| H | 4.95300 | 1 | 1.14190 | 1 | 1.82210 | 1 |
| H | .53820 | 1 | 2.42650 | 1 | -.97310 | 1 |
| H | 4.31570 | 1 | 2.86320 | 1 | 1.12430 | 1 |
| H | .26540 | 1 | 4.86620 | 1 | -.97630 | 1 |
| H | 4.05890 | 1 | 5.27700 | 1 | 1.15260 | 1 |
| H | .85460 | 1 | 8.37560 | 1 | -.38860 | 1 |
| H | -.06160 | 1 | 6.92390 | 1 | .23280 | 1 |
| H | .57920 | 1 | 6.94420 | 1 | -1.47790 | 1 |
| H | 2.60580 | 1 | 8.56180 | 1 | .76870 | 1 |
| H | 3.95440 | 1 | 7.36420 | 1 | .53040 | 1 |
| H | 2.80030 | 1 | 7.17040 | 1 | 1.93190 | 1 |

***************************************************

AM1 PRECISE 1SCF POLAR GRAD XYZ LET

D5

| C | 2.76670 | 1 | -1.02190 | 1 | .24180 | 1 |
| --- | --- | --- | --- | --- | --- | --- |
| C | 1.80900 | 1 | -.05920 | 1 | .12790 | 1 |
| C | 2.89760 | 1 | 1.03490 | 1 | .09960 | 1 |
| C | 3.86970 | 1 | .06160 | 1 | .14180 | 1 |
| C | 2.84810 | 1 | 2.46260 | 1 | .08990 | 1 |
| N | 5.29720 | 1 | .00000 | 1 | .00000 | 1 |
| C | 2.80280 | 1 | -2.44360 | 1 | .42470 | 1 |
| S | .00000 | 1 | .00000 | 1 | .00000 | 1 |
| C | 3.68400 | 1 | -3.03730 | 1 | 1.34510 | 1 |
| C | 1.90650 | 1 | -3.25540 | 1 | -.29100 | 1 |
| C | 5.78970 | 1 | 1.14860 | 1 | -.82780 | 1 |
| C | 5.69010 | 1 | -1.26780 | 1 | -.69550 | 1 |
| C | 5.95630 | 1 | .05110 | 1 | 1.34320 | 1 |
| C | 1.89650 | 1 | 3.13740 | 1 | -.70180 | 1 |
| C | 3.71460 | 1 | 3.21280 | 1 | .90350 | 1 |
| C | 1.85070 | 1 | 4.52430 | 1 | -.71600 | 1 |
| C | 3.66680 | 1 | 4.60120 | 1 | .91360 | 1 |
| C | 3.71420 | 1 | -4.41590 | 1 | 1.51360 | 1 |
| C | 1.92740 | 1 | -4.64020 | 1 | -.13410 | 1 |
| C | 2.84690 | 1 | -5.21870 | 1 | .75270 | 1 |
| N | 2.90240 | 1 | -6.69630 | 1 | .90650 | 1 |
| C | 2.73790 | 1 | 5.25990 | 1 | .09240 | 1 |
| O | 2.61600 | 1 | 6.62670 | 1 | .00000 | 1 |
| C | 3.39930 | 1 | 7.39840 | 1 | .90530 | 1 |
| H | 1.16290 | 1 | 2.55730 | 1 | -1.30210 | 1 |
| H | 4.41570 | 1 | 2.69850 | 1 | 1.57830 | 1 |
| H | 4.32810 | 1 | -2.40800 | 1 | 1.97710 | 1 |
| H | 1.14290 | 1 | -2.78730 | 1 | -.94920 | 1 |
| H | 4.40170 | 1 | -4.87770 | 1 | 2.24200 | 1 |
| H | 1.21750 | 1 | -5.27060 | 1 | -.69860 | 1 |
| O | 3.70390 | 1 | -7.16990 | 1 | 1.66880 | 1 |
| O | 2.15780 | 1 | -7.38030 | 1 | .25850 | 1 |
| H | 1.11180 | 1 | 5.05570 | 1 | -1.33500 | 1 |
| H | 4.33840 | 1 | 5.16770 | 1 | 1.57300 | 1 |
| H | 3.08890 | 1 | 8.45070 | 1 | .68150 | 1 |
| H | 3.15930 | 1 | 7.13160 | 1 | 1.96300 | 1 |
| H | 4.48810 | 1 | 7.25640 | 1 | .69990 | 1 |
| H | 6.90580 | 1 | 1.09170 | 1 | -.90630 | 1 |
| H | 5.32630 | 1 | 1.08750 | 1 | -1.84790 | 1 |
| H | 5.48550 | 1 | 2.11480 | 1 | -.34410 | 1 |
| H | 6.80090 | 1 | -1.27330 | 1 | -.84090 | 1 |
| H | 5.37700 | 1 | -2.14780 | 1 | -.07260 | 1 |
| H | 5.16720 | 1 | -1.31630 | 1 | -1.68720 | 1 |
| H | 7.06630 | 1 | -.03080 | 1 | 1.21400 | 1 |
| H | 5.69630 | 1 | 1.02080 | 1 | 1.84260 | 1 |
| H | 5.57820 | 1 | -.79710 | 1 | 1.97160 | 1 |
| O | -.19470 | 1 | 1.04560 | 1 | -.91650 | 1 |
| O | -.41010 | 1 | .25470 | 1 | 1.30800 | 1 |
| O | -.28820 | 1 | -1.27820 | 1 | -.50330 | 1 |

**************************************************

AM1 1SCF LET PRECISE POLAR GRAD XYZ

D6

| C | 3.86350 | 1 | 0.05300 | 1 | 0.14130 | 1 |
| --- | --- | --- | --- | --- | --- | --- |
| C | 2.88710 | 1 | 1.02190 | 1 | 0.10280 | 1 |
| C | 1.80160 | 1 | -0.07430 | 1 | 0.12730 | 1 |
| C | 2.76240 | 1 | -1.03510 | 1 | 0.23860 | 1 |
| S | 0.00000 | 1 | 0.00000 | 1 | 0.00000 | 1 |
| C | 2.80220 | 1 | -2.45520 | 1 | 0.42990 | 1 |
| N | 5.29120 | 1 | 0.00000 | 1 | 0.00000 | 1 |
| C | 3.70870 | 1 | -3.05690 | 1 | 1.31640 | 1 |
| C | 1.87500 | 1 | -3.26830 | 1 | -0.24750 | 1 |
| C | 5.77790 | 1 | 1.15750 | 1 | -0.81860 | 1 |
| C | 5.69220 | 1 | -1.25900 | 1 | -0.70620 | 1 |
| C | 5.94960 | 1 | 0.04600 | 1 | 1.34400 | 1 |
| C | 3.71990 | 1 | -4.43530 | 1 | 1.49910 | 1 |
| C | 1.88910 | 1 | -4.64740 | 1 | -0.06340 | 1 |
| C | 2.80940 | 1 | -5.24960 | 1 | 0.81100 | 1 |
| C | 2.78830 | 1 | -6.69230 | 1 | 0.95130 | 1 |
| C | 3.10260 | 1 | -7.42010 | 1 | 2.04740 | 1 |
| C | 3.48630 | 1 | -6.88170 | 1 | 3.30720 | 1 |
| C | 3.04270 | 1 | -8.84500 | 1 | 2.00110 | 1 |
| C | 2.83590 | 1 | 2.45010 | 1 | 0.09520 | 1 |
| C | 1.88810 | 1 | 3.12130 | 1 | -0.70490 | 1 |
| C | 3.69290 | 1 | 3.20320 | 1 | 0.91470 | 1 |
| C | 1.83940 | 1 | 4.50780 | 1 | -0.72020 | 1 |
| C | 3.64160 | 1 | 4.59180 | 1 | 0.92410 | 1 |
| C | 2.71740 | 1 | 5.24700 | 1 | 0.09560 | 1 |
| O | 2.59370 | 1 | 6.61380 | 1 | 0.00000 | 1 |
| C | 3.34700 | 1 | 7.38750 | 1 | 0.92910 | 1 |
| H | 4.39220 | 1 | -2.43480 | 1 | 1.91220 | 1 |
| H | 1.10190 | 1 | -2.80150 | 1 | -0.89350 | 1 |
| H | 4.45280 | 1 | -4.88280 | 1 | 2.18700 | 1 |
| H | 1.15130 | 1 | -5.26830 | 1 | -0.59650 | 1 |
| H | 2.45500 | 1 | -7.23600 | 1 | 0.04340 | 1 |
| H | 1.16160 | 1 | 2.53780 | 1 | -1.31120 | 1 |
| H | 4.39060 | 1 | 2.69120 | 1 | 1.59520 | 1 |
| H | 1.10420 | 1 | 5.03710 | 1 | -1.34530 | 1 |
| H | 4.30730 | 1 | 5.15950 | 1 | 1.58820 | 1 |
| H | 6.89510 | 1 | 1.11210 | 1 | -0.88980 | 1 |
| H | 5.32230 | 1 | 1.09760 | 1 | -1.84220 | 1 |
| H | 5.46090 | 1 | 2.11860 | 1 | -0.33230 | 1 |
| H | 6.80350 | 1 | -1.25710 | 1 | -0.84900 | 1 |
| H | 5.38210 | 1 | -2.14720 | 1 | -0.09390 | 1 |
| H | 5.17160 | 1 | -1.30030 | 1 | -1.69940 | 1 |
| H | 7.05960 | 1 | -0.03510 | 1 | 1.21530 | 1 |
| H | 5.68860 | 1 | 1.01400 | 1 | 1.84610 | 1 |
| H | 5.57080 | 1 | -0.80360 | 1 | 1.97000 | 1 |
| N | 3.79000 | 1 | -6.47060 | 1 | 4.35260 | 1 |
| N | 2.99630 | 1 | -10.00640 | 1 | 1.96130 | 1 |
| H | 3.02190 | 1 | 8.43720 | 1 | 0.71340 | 1 |
| H | 3.09490 | 1 | 7.10310 | 1 | 1.97920 | 1 |
| H | 4.44130 | 1 | 7.26710 | 1 | 0.73990 | 1 |
| O | -0.18400 | 1 | 1.01410 | 1 | -0.95640 | 1 |
| O | -0.31750 | 1 | -1.28930 | 1 | -0.45660 | 1 |
| O | -0.41210 | 1 | 0.31230 | 1 | 1.29580 | 1 |

***************************************************

AM1 1SCF LET PRECISE POLAR GRAD XYZ

D7

| C | 1.49790 | 1 | -0.03970 | 1 | 0.20780 | 1 |
| --- | --- | --- | --- | --- | --- | --- |
| C | 2.59050 | 1 | 1.05900 | 1 | 0.15860 | 1 |
| C | 3.54900 | 1 | 0.07410 | 1 | 0.21300 | 1 |
| C | 2.45090 | 1 | -1.00940 | 1 | 0.36600 | 1 |
| N | 4.96940 | 1 | 0.00000 | 1 | 0.00000 | 1 |
| C | 2.53550 | 1 | 2.48470 | 1 | 0.14250 | 1 |
| C | 0.00000 | 1 | 0.00000 | 1 | 0.00000 | 1 |
| C | 2.43340 | 1 | -2.41100 | 1 | 0.64180 | 1 |
| C | 3.45220 | 1 | -3.05340 | 1 | 1.36510 | 1 |
| C | 1.31950 | 1 | -3.16610 | 1 | 0.22300 | 1 |
| C | 5.43580 | 1 | 1.15550 | 1 | -0.83450 | 1 |
| C | 5.31270 | 1 | -1.25540 | 1 | -0.74430 | 1 |
| C | 5.69470 | 1 | 0.02500 | 1 | 1.30840 | 1 |
| C | 3.40500 | 1 | -4.42060 | 1 | 1.60960 | 1 |
| C | 1.25770 | 1 | -4.53490 | 1 | 0.45880 | 1 |
| C | 2.31550 | 1 | -5.16690 | 1 | 1.13380 | 1 |
| N | 2.27820 | 1 | -6.63230 | 1 | 1.36600 | 1 |
| C | 1.51690 | 1 | 3.13130 | 1 | -0.58870 | 1 |
| C | 3.44230 | 1 | 3.25940 | 1 | 0.88460 | 1 |
| C | 1.44800 | 1 | 4.51640 | 1 | -0.62020 | 1 |
| C | 3.37550 | 1 | 4.64770 | 1 | 0.87230 | 1 |
| C | 2.38210 | 1 | 5.27860 | 1 | 0.10790 | 1 |
| O | 2.23370 | 1 | 6.64220 | 1 | 0.00000 | 1 |
| C | 3.08090 | 1 | 7.44140 | 1 | 0.81970 | 1 |
| O | -0.66750 | 1 | -0.91420 | 1 | 0.54230 | 1 |
| O | -0.44640 | 1 | 0.91280 | 1 | -0.74140 | 1 |
| H | 4.28040 | 1 | -2.47210 | 1 | 1.79350 | 1 |
| H | 0.46240 | 1 | -2.64430 | 1 | -0.25200 | 1 |
| H | 6.54550 | 1 | 1.08280 | 1 | -0.97130 | 1 |
| H | 4.92010 | 1 | 1.11760 | 1 | -1.83050 | 1 |
| H | 5.17470 | 1 | 2.11980 | 1 | -0.32350 | 1 |
| H | 6.41220 | 1 | -1.25970 | 1 | -0.96030 | 1 |
| H | 5.03800 | 1 | -2.15030 | 1 | -0.12660 | 1 |
| H | 4.72730 | 1 | -1.28060 | 1 | -1.70150 | 1 |
| H | 6.79130 | 1 | -0.11680 | 1 | 1.12660 | 1 |
| H | 5.51110 | 1 | 1.01230 | 1 | 1.80790 | 1 |
| H | 5.30360 | 1 | -0.79390 | 1 | 1.96670 | 1 |
| H | 4.20960 | 1 | -4.91530 | 1 | 2.17920 | 1 |
| H | 0.38020 | 1 | -5.11630 | 1 | 0.12480 | 1 |
| O | 3.20660 | 1 | -7.15550 | 1 | 1.92620 | 1 |
| O | 1.33050 | 1 | -7.26320 | 1 | 0.98270 | 1 |
| H | 0.75240 | 1 | 2.51900 | 1 | -1.11690 | 1 |
| H | 4.19420 | 1 | 2.76740 | 1 | 1.52100 | 1 |
| H | 0.65910 | 1 | 5.02830 | 1 | -1.19200 | 1 |
| H | 4.08460 | 1 | 5.23490 | 1 | 1.47140 | 1 |
| H | 2.74150 | 1 | 8.48580 | 1 | 0.59980 | 1 |
| H | 2.93270 | 1 | 7.19680 | 1 | 1.89930 | 1 |
| H | 4.15040 | 1 | 7.30470 | 1 | 0.52810 | 1 |

**************************************************

AM1 1SCF LET PRECISE POLAR GRAD XYZ

D8

| C | 2.60130 | 1 | 1.04040 | 1 | -0.04000 | 1 |
| --- | --- | --- | --- | --- | --- | --- |
| C | 1.50780 | 1 | -0.05700 | 1 | -0.09690 | 1 |
| C | 2.45520 | 1 | -1.03540 | 1 | -0.16550 | 1 |
| C | 3.55900 | 1 | 0.05480 | 1 | -0.10110 | 1 |
| C | 2.40290 | 1 | -2.46590 | 1 | -0.19390 | 1 |
| N | 4.99290 | 1 | 0.00000 | 1 | 0.00000 | 1 |
| C | 1.49410 | 1 | -3.11190 | 1 | 0.66650 | 1 |
| C | 3.15870 | 1 | -3.24270 | 1 | -1.08570 | 1 |
| C | 5.61410 | 1 | 1.09750 | 1 | -0.80750 | 1 |
| C | 5.52080 | 1 | -1.30270 | 1 | -0.50990 | 1 |
| C | 5.40040 | 1 | 0.13840 | 1 | 1.43700 | 1 |
| C | 1.40310 | 1 | -4.50140 | 1 | 0.67870 | 1 |
| C | 3.07150 | 1 | -4.62910 | 1 | -1.06420 | 1 |
| C | 2.19920 | 1 | -5.27850 | 1 | -0.17340 | 1 |
| C | 2.18030 | 1 | -6.72770 | 1 | -0.16370 | 1 |
| C | 1.12740 | 1 | -7.54080 | 1 | 0.07890 | 1 |
| C | -0.20320 | 1 | -7.11020 | 1 | 0.33720 | 1 |
| C | 1.30550 | 1 | -8.95710 | 1 | 0.06500 | 1 |
| C | 2.48630 | 1 | 2.46010 | 1 | 0.01800 | 1 |
| C | 0.00000 | 1 | 0.00000 | 1 | 0.00000 | 1 |
| C | 1.36400 | 1 | 3.06310 | 1 | -0.59520 | 1 |
| C | 3.41270 | 1 | 3.27870 | 1 | 0.68170 | 1 |
| C | 1.21030 | 1 | 4.44070 | 1 | -0.59020 | 1 |
| C | 3.26500 | 1 | 4.66050 | 1 | 0.70880 | 1 |
| C | 2.16690 | 1 | 5.24490 | 1 | 0.05930 | 1 |
| O | 1.92970 | 1 | 6.59850 | 1 | 0.00000 | 1 |
| C | 2.81780 | 1 | 7.43390 | 1 | 0.73570 | 1 |
| H | 0.81700 | 1 | -2.49430 | 1 | 1.29400 | 1 |
| H | 3.78760 | 1 | -2.75790 | 1 | -1.84570 | 1 |
| H | 0.69630 | 1 | -4.98620 | 1 | 1.37080 | 1 |
| H | 3.67250 | 1 | -5.22500 | 1 | -1.76790 | 1 |
| H | 3.15620 | 1 | -7.19870 | 1 | -0.39960 | 1 |
| H | 0.58720 | 1 | 2.41500 | 1 | -1.06370 | 1 |
| H | 4.25520 | 1 | 2.83350 | 1 | 1.23130 | 1 |
| H | 0.34020 | 1 | 4.91240 | 1 | -1.07190 | 1 |
| H | 3.99630 | 1 | 5.27790 | 1 | 1.24760 | 1 |
| H | 6.72770 | 1 | 1.05310 | 1 | -0.69430 | 1 |
| H | 5.32750 | 1 | 0.96250 | 1 | -1.88410 | 1 |
| H | 5.23030 | 1 | 2.08970 | 1 | -0.45130 | 1 |
| H | 6.63000 | 1 | -1.33300 | 1 | -0.35050 | 1 |
| H | 5.02500 | 1 | -2.14380 | 1 | 0.04640 | 1 |
| H | 5.28950 | 1 | -1.38680 | 1 | -1.60410 | 1 |
| H | 6.51840 | 1 | 0.14040 | 1 | 1.50690 | 1 |
| H | 4.98530 | 1 | 1.09320 | 1 | 1.85120 | 1 |
| H | 4.97920 | 1 | -0.72580 | 1 | 2.01610 | 1 |
| N | -1.30480 | 1 | -6.79330 | 1 | 0.53590 | 1 |
| N | 1.45360 | 1 | -10.11070 | 1 | 0.05410 | 1 |
| H | 2.40230 | 1 | 8.46060 | 1 | 0.57020 | 1 |
| H | 2.79930 | 1 | 7.17120 | 1 | 1.82110 | 1 |
| H | 3.85540 | 1 | 7.35720 | 1 | 0.32920 | 1 |
| O | -0.60370 | 1 | 0.76060 | 1 | -0.79790 | 1 |
| O | -0.51140 | 1 | -0.73250 | 1 | 0.88360 | 1 |

***************************************************

AM1 1SCF PRECISE LET POLAR GRAD XYZ

D9

| C | 1.78764 | 1 | .11271 | 1 | -.14974 | 1 |
| --- | --- | --- | --- | --- | --- | --- |
| C | 2.75548 | 1 | 1.08638 | 1 | -.10704 | 1 |
| C | 3.85840 | 1 | -.01132 | 1 | -.20939 | 1 |
| C | 2.83418 | 1 | -.95269 | 1 | -.32894 | 1 |
| N | 5.21781 | 1 | -.00031 | 1 | -.00025 | 1 |
| C | 2.84573 | 1 | 2.50459 | 1 | -.08162 | 1 |
| C | 5.82099 | 1 | 1.10390 | 1 | .56593 | 1 |
| C | 6.00298 | 1 | -1.09141 | 1 | -.30669 | 1 |
| S | .00019 | 1 | .00009 | 1 | -.00011 | 1 |
| C | 7.19910 | 1 | 1.14035 | 1 | .79660 | 1 |
| C | 7.38072 | 1 | -1.08757 | 1 | -.07833 | 1 |
| C | 7.99413 | 1 | .03984 | 1 | .47267 | 1 |
| C | 3.86531 | 1 | 3.18451 | 1 | -.77156 | 1 |
| C | 1.86363 | 1 | 3.26756 | 1 | .58045 | 1 |
| C | 3.93325 | 1 | 4.56643 | 1 | -.77698 | 1 |
| C | 1.93003 | 1 | 4.65162 | 1 | .59298 | 1 |
| C | 2.97265 | 1 | 5.34482 | 1 | -.07443 | 1 |
| N | 3.08984 | 1 | 6.73472 | 1 | -.00013 | 1 |
| C | 3.92373 | 1 | 7.39990 | 1 | -.96670 | 1 |
| C | 1.98509 | 1 | 7.48579 | 1 | .53737 | 1 |
| C | 2.75054 | 1 | -2.36549 | 1 | -.57178 | 1 |
| C | 1.90129 | 1 | -3.16667 | 1 | .20718 | 1 |
| C | 3.48333 | 1 | -2.94409 | 1 | -1.62500 | 1 |
| C | 1.83339 | 1 | -4.54341 | 1 | -.01941 | 1 |
| C | 3.40971 | 1 | -4.30831 | 1 | -1.87016 | 1 |
| C | 2.59970 | 1 | -5.10958 | 1 | -1.04598 | 1 |
| N | 2.55035 | 1 | -6.57923 | 1 | -1.28431 | 1 |
| H | 1.24714 | 1 | -2.70282 | 1 | .98017 | 1 |
| H | 4.07756 | 1 | -2.30655 | 1 | -2.29959 | 1 |
| H | 5.15542 | 1 | 1.95118 | 1 | .83716 | 1 |
| H | 5.48635 | 1 | -1.97469 | 1 | -.73095 | 1 |
| H | 1.16599 | 1 | -5.17018 | 1 | .59889 | 1 |
| H | 3.97182 | 1 | -4.75983 | 1 | -2.70579 | 1 |
| O | 1.85783 | 1 | -7.26053 | 1 | -.57942 | 1 |
| O | 3.21830 | 1 | -7.04327 | 1 | -2.16985 | 1 |
| H | 7.63381 | 1 | 2.04788 | 1 | 1.24508 | 1 |
| H | 7.96347 | 1 | -1.98525 | 1 | -.33897 | 1 |
| H | 9.08053 | 1 | .05706 | 1 | .65342 | 1 |
| O | -.13889 | 1 | -1.16283 | 1 | .78387 | 1 |
| O | -.33439 | 1 | 1.19455 | 1 | .65658 | 1 |
| O | -.44134 | 1 | -.12090 | 1 | -1.31924 | 1 |
| H | 4.60417 | 1 | 2.61059 | 1 | -1.35288 | 1 |
| H | 1.01258 | 1 | 2.75269 | 1 | 1.07656 | 1 |
| H | 4.73764 | 1 | 5.05251 | 1 | -1.34767 | 1 |
| H | 1.13572 | 1 | 5.20133 | 1 | 1.12144 | 1 |
| H | 3.81497 | 1 | 8.51193 | 1 | -.86968 | 1 |
| H | 4.99757 | 1 | 7.13339 | 1 | -.77084 | 1 |
| H | 3.66716 | 1 | 7.10533 | 1 | -2.02100 | 1 |
| H | 1.81857 | 1 | 7.18047 | 1 | 1.60573 | 1 |
| H | 2.22586 | 1 | 8.58127 | 1 | .51866 | 1 |
| H | 1.03557 | 1 | 7.31473 | 1 | -.03981 | 1 |

*************************************************

AM1 1SCF LET PRECISE POLAR GRAD XYZ

D10

| C | 2.75510 | 1 | 1.08610 | 1 | -.09550 | 1 |
| --- | --- | --- | --- | --- | --- | --- |
| C | 1.78590 | 1 | .11090 | 1 | -.13470 | 1 |
| C | 2.82950 | 1 | -.94920 | 1 | -.33270 | 1 |
| C | 3.85770 | 1 | -.00450 | 1 | -.21300 | 1 |
| C | 2.74520 | 1 | -2.35730 | 1 | -.58140 | 1 |
| N | 5.21290 | 1 | .00000 | 1 | .00000 | 1 |
| C | 1.88700 | 1 | -3.15520 | 1 | .19330 | 1 |
| C | 3.47330 | 1 | -2.94420 | 1 | -1.63380 | 1 |
| C | 1.81250 | 1 | -4.52830 | 1 | -.04500 | 1 |
| C | 3.36740 | 1 | -4.30420 | 1 | -1.88730 | 1 |
| C | 2.55210 | 1 | -5.11440 | 1 | -1.07710 | 1 |
| C | 2.45880 | 1 | -6.53390 | 1 | -1.37600 | 1 |
| C | 2.48010 | 1 | -7.53400 | 1 | -.46740 | 1 |
| C | 2.63000 | 1 | -7.33160 | 1 | .93380 | 1 |
| C | 2.37450 | 1 | -8.89500 | 1 | -.87920 | 1 |
| C | 5.82820 | 1 | 1.11020 | 1 | .54210 | 1 |
| C | 5.98880 | 1 | -1.10550 | 1 | -.28140 | 1 |
| C | 7.20660 | 1 | 1.14100 | 1 | .76800 | 1 |
| C | 7.36710 | 1 | -1.10670 | 1 | -.05670 | 1 |
| C | 7.99210 | 1 | .02750 | 1 | .46560 | 1 |
| C | 2.83780 | 1 | 2.50500 | 1 | -.07260 | 1 |
| S | .00000 | 1 | .00000 | 1 | .00000 | 1 |
| C | 3.84790 | 1 | 3.18700 | 1 | -.77540 | 1 |
| C | 1.85930 | 1 | 3.26620 | 1 | .59640 | 1 |
| C | 3.91220 | 1 | 4.56910 | 1 | -.78120 | 1 |
| C | 1.92080 | 1 | 4.65060 | 1 | .60640 | 1 |
| C | 2.95620 | 1 | 5.34580 | 1 | -.07030 | 1 |
| N | 3.07230 | 1 | 6.73660 | 1 | .00000 | 1 |
| C | 3.87340 | 1 | 7.40220 | 1 | -.99350 | 1 |
| C | 1.98850 | 1 | 7.48850 | 1 | .57720 | 1 |
| H | 1.24380 | 1 | -2.69100 | 1 | .97340 | 1 |
| H | 4.08480 | 1 | -2.31360 | 1 | -2.29830 | 1 |
| H | 1.13610 | 1 | -5.14420 | 1 | .57070 | 1 |
| H | 3.92000 | 1 | -4.75170 | 1 | -2.72830 | 1 |
| H | 2.37240 | 1 | -6.78180 | 1 | -2.45210 | 1 |
| N | 2.76700 | 1 | -7.18010 | 1 | 2.07900 | 1 |
| N | 2.28950 | 1 | -10.00500 | 1 | -1.21570 | 1 |
| O | -.15180 | 1 | -1.13270 | 1 | .82430 | 1 |
| O | -.34780 | 1 | 1.21740 | 1 | .60670 | 1 |
| O | -.42620 | 1 | -.17250 | 1 | -1.32000 | 1 |
| H | 5.17080 | 1 | 1.96660 | 1 | .80180 | 1 |
| H | 5.46170 | 1 | -1.99470 | 1 | -.67940 | 1 |
| H | 7.64960 | 1 | 2.05440 | 1 | 1.19590 | 1 |
| H | 7.94120 | 1 | -2.01580 | 1 | -.29590 | 1 |
| H | 9.07880 | 1 | .03990 | 1 | .64110 | 1 |
| H | 4.58310 | 1 | 2.61440 | 1 | -1.36300 | 1 |
| H | 1.01320 | 1 | 2.74920 | 1 | 1.09880 | 1 |
| H | 4.71110 | 1 | 5.05740 | 1 | -1.35820 | 1 |
| H | 1.12800 | 1 | 5.19850 | 1 | 1.13880 | 1 |
| H | 3.74220 | 1 | 8.51310 | 1 | -.91540 | 1 |
| H | 4.95600 | 1 | 7.16100 | 1 | -.81360 | 1 |
| H | 3.60450 | 1 | 7.08250 | 1 | -2.03730 | 1 |
| H | 2.25060 | 1 | 8.57930 | 1 | .58740 | 1 |
| H | 1.02790 | 1 | 7.35340 | 1 | .00930 | 1 |
| H | 1.83240 | 1 | 7.15550 | 1 | 1.63850 | 1 |

**************************************************

AM1 1SCF LET PRECISE POLAR GRAD XYZ

D11

| C | 2.46550 | 1 | 1.06480 | 1 | -.12920 | 1 |
| --- | --- | --- | --- | --- | --- | --- |
| C | 1.50520 | 1 | .09770 | 1 | -.12690 | 1 |
| C | 2.57070 | 1 | -1.00690 | 1 | -.20070 | 1 |
| C | 3.56600 | 1 | -.04460 | 1 | -.15190 | 1 |
| C | 2.46890 | 1 | -2.42950 | 1 | -.30460 | 1 |
| N | 4.93930 | 1 | .00000 | 1 | .00000 | 1 |
| C | 1.41440 | 1 | -3.09060 | 1 | .34710 | 1 |
| C | 3.38080 | 1 | -3.16900 | 1 | -1.08130 | 1 |
| C | 5.59980 | 1 | 1.20860 | 1 | -.01700 | 1 |
| C | 5.67280 | 1 | -1.14850 | 1 | .20970 | 1 |
| C | 1.30400 | 1 | -4.47980 | 1 | .27230 | 1 |
| C | 3.27270 | 1 | -4.54990 | 1 | -1.17320 | 1 |
| C | 2.24190 | 1 | -5.20430 | 1 | -.47520 | 1 |
| N | 2.14780 | 1 | -6.68920 | 1 | -.54540 | 1 |
| C | 6.98610 | 1 | 1.28190 | 1 | .15090 | 1 |
| C | 7.05810 | 1 | -1.10830 | 1 | .37960 | 1 |
| C | 7.72950 | 1 | .11690 | 1 | .34740 | 1 |
| C | 2.55200 | 1 | 2.49130 | 1 | -.10810 | 1 |
| C | .00000 | 1 | .00000 | 1 | .00000 | 1 |
| C | 3.14100 | 1 | 3.20580 | 1 | -1.16080 | 1 |
| C | 1.97540 | 1 | 3.21250 | 1 | .94940 | 1 |
| C | 3.19280 | 1 | 4.59250 | 1 | -1.14590 | 1 |
| C | 2.02260 | 1 | 4.59870 | 1 | .97750 | 1 |
| C | 2.64530 | 1 | 5.32930 | 1 | -.06540 | 1 |
| N | 2.78010 | 1 | 6.72740 | 1 | .00000 | 1 |
| C | 3.04000 | 1 | 7.42150 | 1 | -1.23700 | 1 |
| C | 1.95660 | 1 | 7.42700 | 1 | .95490 | 1 |
| H | .65110 | 1 | -2.49430 | 1 | .90430 | 1 |
| H | 4.16110 | 1 | -2.65090 | 1 | -1.66000 | 1 |
| H | .47600 | 1 | -4.99550 | 1 | .79150 | 1 |
| H | 3.98140 | 1 | -5.12990 | 1 | -1.79040 | 1 |
| O | 1.26480 | 1 | -7.24550 | 1 | .04720 | 1 |
| O | 2.96840 | 1 | -7.28980 | 1 | -1.18730 | 1 |
| H | 4.97410 | 1 | 2.11740 | 1 | -.16300 | 1 |
| H | 5.10670 | 1 | -2.10110 | 1 | .25500 | 1 |
| H | 7.46840 | 1 | 2.27250 | 1 | .12770 | 1 |
| H | 7.60110 | 1 | -2.05290 | 1 | .54290 | 1 |
| H | 8.82210 | 1 | .16200 | 1 | .48010 | 1 |
| O | -.42090 | 1 | -.77780 | 1 | .90040 | 1 |
| O | -.68930 | 1 | .69340 | 1 | -.77910 | 1 |
| H | 3.53630 | 1 | 2.66290 | 1 | -2.03370 | 1 |
| H | 1.45950 | 1 | 2.66830 | 1 | 1.75780 | 1 |
| H | 3.65130 | 1 | 5.10800 | 1 | -2.00270 | 1 |
| H | 1.54920 | 1 | 5.11810 | 1 | 1.82480 | 1 |
| H | 2.99340 | 1 | 8.52980 | 1 | -1.07120 | 1 |
| H | 4.07580 | 1 | 7.16420 | 1 | -1.58680 | 1 |
| H | 2.30860 | 1 | 7.14840 | 1 | -2.04570 | 1 |
| H | 2.26480 | 1 | 7.12340 | 1 | 1.99140 | 1 |
| H | 2.11450 | 1 | 8.53280 | 1 | .85310 | 1 |
| H | .86220 | 1 | 7.20660 | 1 | .82410 | 1 |

*************************************************

AM1 1SCF LET PRECISE POLAR GRAD XYZ

D12

| C | 3.56900 | 1 | -.05840 | 1 | -.03240 | 1 |
| --- | --- | --- | --- | --- | --- | --- |
| C | 2.57780 | 1 | -1.03310 | 1 | -.01200 | 1 |
| C | 1.50680 | 1 | .05370 | 1 | -.02930 | 1 |
| C | 2.46280 | 1 | 1.03460 | 1 | -.04790 | 1 |
| C | 2.51890 | 1 | -2.45740 | 1 | .04860 | 1 |
| C | 3.54030 | 1 | -3.20680 | 1 | .66150 | 1 |
| C | 3.45670 | 1 | -4.59180 | 1 | .73000 | 1 |
| C | 2.35350 | 1 | -5.26220 | 1 | .17730 | 1 |
| C | 1.32400 | 1 | -4.51490 | 1 | -.41430 | 1 |
| C | 1.39900 | 1 | -3.12580 | 1 | -.47830 | 1 |
| C | 2.50940 | 1 | 2.45670 | 1 | -.06600 | 1 |
| C | 3.52180 | 1 | 3.17160 | 1 | -.72300 | 1 |
| C | 3.52860 | 1 | 4.55870 | 1 | -.73240 | 1 |
| C | 2.51130 | 1 | 5.29400 | 1 | -.07340 | 1 |
| C | 1.47440 | 1 | 4.56370 | 1 | .55540 | 1 |
| C | 1.47040 | 1 | 3.17700 | 1 | .55390 | 1 |
| C | 2.21440 | 1 | -6.70550 | 1 | .23520 | 1 |
| C | 3.20400 | 1 | -7.62260 | 1 | .14380 | 1 |
| C | 4.58050 | 1 | -7.31420 | 1 | -.04770 | 1 |
| N | 5.70860 | 1 | -7.08360 | 1 | -.21520 | 1 |
| C | 2.89980 | 1 | -9.01410 | 1 | .21800 | 1 |
| N | 2.64740 | 1 | -10.14780 | 1 | .27840 | 1 |
| N | 4.94530 | 1 | .00000 | 1 | .00000 | 1 |
| C | 5.57970 | 1 | 1.11360 | 1 | .50640 | 1 |
| C | 6.97530 | 1 | 1.19750 | 1 | .53860 | 1 |
| C | 7.75150 | 1 | .13860 | 1 | .06470 | 1 |
| C | 7.10660 | 1 | -.99150 | 1 | -.44580 | 1 |
| C | 5.71170 | 1 | -1.04240 | 1 | -.47720 | 1 |
| C | .00000 | 1 | .00000 | 1 | .00000 | 1 |
| O | -.57640 | 1 | .86350 | 1 | .70850 | 1 |
| O | -.56440 | 1 | -.89610 | 1 | -.68190 | 1 |
| N | 2.58770 | 1 | 6.70170 | 1 | .00000 | 1 |
| C | 2.98530 | 1 | 7.38350 | 1 | -1.20970 | 1 |
| C | 1.56360 | 1 | 7.37350 | 1 | .76230 | 1 |
| H | 4.39550 | 1 | -2.69410 | 1 | 1.12750 | 1 |
| H | 4.24890 | 1 | -5.15990 | 1 | 1.24020 | 1 |
| H | .43860 | 1 | -5.02430 | 1 | -.82840 | 1 |
| H | .56460 | 1 | -2.53270 | 1 | -.92240 | 1 |
| H | 4.30720 | 1 | 2.63020 | 1 | -1.27230 | 1 |
| H | 4.33750 | 1 | 5.07980 | 1 | -1.26510 | 1 |
| H | .63460 | 1 | 5.08150 | 1 | 1.04480 | 1 |
| H | .62900 | 1 | 2.61400 | 1 | 1.01370 | 1 |
| H | 1.17090 | 1 | -7.06410 | 1 | .34760 | 1 |
| H | 4.92410 | 1 | 1.92930 | 1 | .88240 | 1 |
| H | 7.43990 | 1 | 2.10800 | 1 | .94990 | 1 |
| H | 8.85130 | 1 | .19160 | 1 | .09170 | 1 |
| H | 7.67810 | 1 | -1.85030 | 1 | -.83250 | 1 |
| H | 5.16190 | 1 | -1.91150 | 1 | -.89230 | 1 |
| H | 2.93430 | 1 | 8.49240 | 1 | -1.04780 | 1 |
| H | 4.04610 | 1 | 7.11370 | 1 | -1.45480 | 1 |
| H | 2.33530 | 1 | 7.11930 | 1 | -2.08750 | 1 |
| H | 1.83630 | 1 | 8.45820 | 1 | .85570 | 1 |
| H | .54560 | 1 | 7.29920 | 1 | .29160 | 1 |
| H | 1.52150 | 1 | 6.93010 | 1 | 1.79230 | 1 |

**************************************************

AM1 LET 1SCF PRECISE POLAR GRAD XYZ

D13

| C | 2.86190 | 1 | 1.02050 | 1 | -0.01980 | 1 |
| --- | --- | --- | --- | --- | --- | --- |
| C | 1.80390 | 1 | -0.08010 | 1 | -0.05070 | 1 |
| C | 2.77910 | 1 | -1.03630 | 1 | -0.09030 | 1 |
| C | 3.87180 | 1 | 0.05140 | 1 | -0.03560 | 1 |
| C | 2.86260 | 1 | -2.45910 | 1 | -0.21750 | 1 |
| S | 0.00000 | 1 | 0.00000 | 1 | 0.00000 | 1 |
| C | 3.91990 | 1 | -3.04730 | 1 | -0.93550 | 1 |
| C | 1.86350 | 1 | -3.27880 | 1 | 0.33300 | 1 |
| C | 3.99660 | 1 | -4.42480 | 1 | -1.08690 | 1 |
| C | 1.93480 | 1 | -4.66460 | 1 | 0.19830 | 1 |
| C | 3.00700 | 1 | -5.23430 | 1 | -0.50320 | 1 |
| N | 3.10240 | 1 | -6.71230 | 1 | -0.63980 | 1 |
| O | -0.36580 | 1 | -1.33770 | 1 | 0.19460 | 1 |
| O | -0.30520 | 1 | 0.56700 | 1 | -1.24770 | 1 |
| C | 2.76520 | 1 | 2.43160 | 1 | -0.00360 | 1 |
| N | 5.24560 | 1 | 0.00000 | 1 | 0.00000 | 1 |
| C | 6.01100 | 1 | 1.02600 | 1 | -0.50990 | 1 |
| C | 5.88460 | 1 | -1.09540 | 1 | 0.54160 | 1 |
| C | 1.58020 | 1 | 3.05160 | 1 | -0.45710 | 1 |
| C | 3.81780 | 1 | 3.24520 | 1 | 0.47570 | 1 |
| C | 1.47020 | 1 | 4.43710 | 1 | -0.48180 | 1 |
| C | 3.71420 | 1 | 4.62220 | 1 | 0.47270 | 1 |
| C | 2.53250 | 1 | 5.22570 | 1 | -0.02050 | 1 |
| O | 2.53430 | 1 | 6.59640 | 1 | 0.00000 | 1 |
| C | 1.33970 | 1 | 7.24200 | 1 | -0.44220 | 1 |
| C | 7.40660 | 1 | 0.98220 | 1 | -0.46710 | 1 |
| C | 7.27970 | 1 | -1.17330 | 1 | 0.58640 | 1 |
| C | 8.05440 | 1 | -0.12550 | 1 | 0.08470 | 1 |
| O | 4.00860 | 1 | -7.17740 | 1 | -1.27970 | 1 |
| O | 2.28170 | 1 | -7.40350 | 1 | -0.10090 | 1 |
| O | -0.23070 | 1 | 0.86150 | 1 | 1.07940 | 1 |
| H | 4.67540 | 1 | -2.41210 | 1 | -1.42130 | 1 |
| H | 0.98840 | 1 | -2.82280 | 1 | 0.84340 | 1 |
| H | 4.81790 | 1 | -4.88000 | 1 | -1.66610 | 1 |
| H | 1.14560 | 1 | -5.30250 | 1 | 0.63390 | 1 |
| H | 5.46200 | 1 | 1.87400 | 1 | -0.96690 | 1 |
| H | 5.23240 | 1 | -1.90100 | 1 | 0.93740 | 1 |
| H | 0.72770 | 1 | 2.42870 | 1 | -0.80570 | 1 |
| H | 4.72070 | 1 | 2.77630 | 1 | 0.89680 | 1 |
| H | 0.53980 | 1 | 4.89420 | 1 | -0.85010 | 1 |
| H | 4.52220 | 1 | 5.26100 | 1 | 0.85630 | 1 |
| H | 1.56990 | 1 | 8.32850 | 1 | -0.29910 | 1 |
| H | 0.47030 | 1 | 6.93390 | 1 | 0.18750 | 1 |
| H | 1.15080 | 1 | 7.01390 | 1 | -1.51890 | 1 |
| H | 7.97570 | 1 | 1.82900 | 1 | -0.88220 | 1 |
| H | 7.74620 | 1 | -2.06850 | 1 | 1.02790 | 1 |
| H | 9.15430 | 1 | -0.17240 | 1 | 0.12100 | 1 |

**************************************************

AM1 1SCF LET PRECISE POLAR GRAD XYZ

D14

| C | 2.75748 | 1 | 1.01815 | 1 | 0.01989 | 1 |
| --- | --- | --- | --- | --- | --- | --- |
| C | 1.69051 | 1 | -0.05348 | 1 | -0.13352 | 1 |
| C | 2.62231 | 1 | -1.03399 | 1 | 0.06954 | 1 |
| C | 3.74251 | 1 | 0.03264 | 1 | 0.16570 | 1 |
| C | 2.62241 | 1 | -2.46182 | 1 | 0.18836 | 1 |
| N | 5.11655 | 1 | -0.03297 | 1 | 0.17361 | 1 |
| C | 1.81707 | 1 | -3.22618 | 1 | -0.67456 | 1 |
| C | 3.37138 | 1 | -3.11330 | 1 | 1.18305 | 1 |
| C | 5.88794 | 1 | 1.10892 | 1 | 0.22779 | 1 |
| C | 5.76264 | 1 | -1.24803 | 1 | 0.07798 | 1 |
| C | 1.80296 | 1 | -4.61446 | 1 | -0.57009 | 1 |
| C | 3.36356 | 1 | -4.50075 | 1 | 1.27583 | 1 |
| C | 2.59150 | 1 | -5.26594 | 1 | 0.38952 | 1 |
| C | 2.54953 | 1 | -6.71537 | 1 | 0.47110 | 1 |
| C | 3.61349 | 1 | -7.52651 | 1 | 0.67252 | 1 |
| C | 4.95211 | 1 | -7.05843 | 1 | 0.80022 | 1 |
| C | 3.44966 | 1 | -8.94001 | 1 | 0.74761 | 1 |
| C | 7.28365 | 1 | 1.05237 | 1 | 0.23737 | 1 |
| C | 7.15702 | 1 | -1.33776 | 1 | 0.09043 | 1 |
| C | 7.93371 | 1 | -0.18127 | 1 | 0.18213 | 1 |
| C | 2.71465 | 1 | 2.44080 | 1 | 0.02184 | 1 |
| S | -0.08900 | 1 | 0.01193 | 1 | -0.45563 | 1 |
| C | 1.90716 | 1 | 3.12339 | 1 | -0.90908 | 1 |
| C | 3.44402 | 1 | 3.18805 | 1 | 0.97309 | 1 |
| C | 1.90099 | 1 | 4.51473 | 1 | -0.95024 | 1 |
| C | 3.42664 | 1 | 4.57031 | 1 | 0.95699 | 1 |
| C | 2.66778 | 1 | 5.24013 | 1 | -0.02969 | 1 |
| O | 2.75653 | 1 | 6.61020 | 1 | 0.00688 | 1 |
| C | 1.93651 | 1 | 7.32532 | 1 | -0.91582 | 1 |
| O | -0.19263 | 1 | 1.11745 | 1 | -1.31648 | 1 |
| O | -0.32113 | 1 | -1.22826 | 1 | -1.07092 | 1 |
| N | 6.04971 | 1 | -6.68339 | 1 | 0.88988 | 1 |
| N | 3.31460 | 1 | -10.09335 | 1 | 0.80941 | 1 |
| O | -0.64543 | 1 | 0.18164 | 1 | 0.81248 | 1 |
| H | 1.15763 | 1 | -2.71767 | 1 | -1.40877 | 1 |
| H | 3.94249 | 1 | -2.52321 | 1 | 1.91652 | 1 |
| H | 5.35008 | 1 | 2.07738 | 1 | 0.24087 | 1 |
| H | 5.12283 | 1 | -2.14888 | 1 | -0.02230 | 1 |
| H | 1.16078 | 1 | -5.19995 | 1 | -1.24725 | 1 |
| H | 3.94993 | 1 | -4.99946 | 1 | 2.06318 | 1 |
| H | 1.54483 | 1 | -7.16376 | 1 | 0.33670 | 1 |
| H | 7.85007 | 1 | 1.99592 | 1 | 0.28660 | 1 |
| H | 7.62129 | 1 | -2.33492 | 1 | 0.02276 | 1 |
| H | 9.03293 | 1 | -0.24125 | 1 | 0.19982 | 1 |
| H | 1.26233 | 1 | 2.55100 | 1 | -1.61079 | 1 |
| H | 3.99243 | 1 | 2.66510 | 1 | 1.77316 | 1 |
| H | 1.27228 | 1 | 5.02541 | 1 | -1.69431 | 1 |
| H | 3.97674 | 1 | 5.15883 | 1 | 1.70464 | 1 |
| H | 2.16050 | 1 | 8.39686 | 1 | -0.67985 | 1 |
| H | 0.85775 | 1 | 7.09679 | 1 | -0.73956 | 1 |
| H | 2.22619 | 1 | 7.08207 | 1 | -1.96677 | 1 |

***************************************************

AM1 1SCF LET PRECISE POLAR GRAD XYZ

D15

| C | 1.50370 | 1 | -0.04010 | 1 | 0.16190 | 1 |
| --- | --- | --- | --- | --- | --- | --- |
| C | 2.46620 | 1 | -1.00740 | 1 | 0.28020 | 1 |
| C | 3.56650 | 1 | 0.08340 | 1 | 0.20670 | 1 |
| C | 2.57370 | 1 | 1.06240 | 1 | 0.17250 | 1 |
| C | 2.51060 | 1 | -2.42550 | 1 | 0.44330 | 1 |
| C | 1.45610 | 1 | -3.20920 | 1 | -0.06110 | 1 |
| C | 1.51030 | 1 | -4.59800 | 1 | 0.01090 | 1 |
| C | 2.61970 | 1 | -5.21410 | 1 | 0.61170 | 1 |
| C | 3.63720 | 1 | -4.44330 | 1 | 1.19870 | 1 |
| C | 3.57370 | 1 | -3.05810 | 1 | 1.11320 | 1 |
| C | 2.48330 | 1 | 2.48040 | 1 | 0.13960 | 1 |
| C | 1.51320 | 1 | 3.08090 | 1 | -0.68920 | 1 |
| C | 1.41670 | 1 | 4.46550 | 1 | -0.77750 | 1 |
| C | 2.25460 | 1 | 5.26950 | 1 | 0.00540 | 1 |
| C | 3.18990 | 1 | 4.68310 | 1 | 0.88760 | 1 |
| C | 3.29450 | 1 | 3.30480 | 1 | 0.94690 | 1 |
| N | 2.72110 | 1 | -6.69590 | 1 | 0.63660 | 1 |
| O | 1.85620 | 1 | -7.35070 | 1 | 0.12060 | 1 |
| O | 3.67800 | 1 | -7.20430 | 1 | 1.16040 | 1 |
| O | 2.24540 | 1 | 6.64320 | 1 | 0.00000 | 1 |
| C | 1.23260 | 1 | 7.26660 | 1 | -0.78830 | 1 |
| C | 0.00000 | 1 | 0.00000 | 1 | 0.00000 | 1 |
| O | -0.50760 | 1 | 1.07860 | 1 | -0.39970 | 1 |
| O | -0.61810 | 1 | -1.06640 | 1 | 0.24290 | 1 |
| N | 4.92810 | 1 | 0.00000 | 1 | 0.00000 | 1 |
| C | 5.76110 | 1 | 1.08250 | 1 | 0.17730 | 1 |
| C | 7.13700 | 1 | 0.99240 | 1 | -0.05160 | 1 |
| C | 7.69930 | 1 | -0.21490 | 1 | -0.47090 | 1 |
| C | 6.85430 | 1 | -1.30770 | 1 | -0.67370 | 1 |
| C | 5.48120 | 1 | -1.18200 | 1 | -0.44950 | 1 |
| H | 0.56040 | 1 | -2.70350 | 1 | -0.48190 | 1 |
| H | 0.68600 | 1 | -5.20670 | 1 | -0.40100 | 1 |
| H | 4.47390 | 1 | -4.93500 | 1 | 1.72280 | 1 |
| H | 4.34880 | 1 | -2.45340 | 1 | 1.60770 | 1 |
| H | 0.80400 | 1 | 2.43720 | 1 | -1.25270 | 1 |
| H | 0.66170 | 1 | 4.90890 | 1 | -1.44320 | 1 |
| H | 3.80460 | 1 | 5.33250 | 1 | 1.52690 | 1 |
| H | 3.97280 | 1 | 2.85360 | 1 | 1.68840 | 1 |
| H | 1.38930 | 1 | 8.35740 | 1 | -0.59130 | 1 |
| H | 0.21740 | 1 | 6.94370 | 1 | -0.45370 | 1 |
| H | 1.38480 | 1 | 7.03420 | 1 | -1.87030 | 1 |
| H | 5.28870 | 1 | 2.03270 | 1 | 0.49190 | 1 |
| H | 7.75840 | 1 | 1.88820 | 1 | 0.10630 | 1 |
| H | 8.78340 | 1 | -0.30160 | 1 | -0.64440 | 1 |
| H | 7.24580 | 1 | -2.27810 | 1 | -1.01970 | 1 |
| H | 4.77910 | 1 | -2.02060 | 1 | -0.64050 | 1 |

**************************************************

AM1 1SCF LET PRECISE POLAR GRAD XYZ

D16

| C | 2.58400 | 1 | 1.06370 | 1 | -0.04460 | 1 |
| --- | --- | --- | --- | --- | --- | --- |
| C | 1.50980 | 1 | -0.02940 | 1 | -0.01430 | 1 |
| C | 2.46780 | 1 | -1.00710 | 1 | 0.01820 | 1 |
| C | 3.57130 | 1 | 0.07490 | 1 | -0.01830 | 1 |
| C | 2.50730 | 1 | -2.43330 | 1 | 0.04710 | 1 |
| N | 4.94460 | 1 | 0.00000 | 1 | 0.00000 | 1 |
| C | 2.53070 | 1 | 2.47850 | 1 | -0.03840 | 1 |
| C | 5.72410 | 1 | 0.97400 | 1 | -0.58740 | 1 |
| C | 5.56720 | 1 | -1.07570 | 1 | 0.59780 | 1 |
| C | 1.35490 | 1 | 3.13110 | 1 | -0.46590 | 1 |
| C | 3.61690 | 1 | 3.26010 | 1 | 0.41600 | 1 |
| C | 1.28020 | 1 | 4.52000 | 1 | -0.47500 | 1 |
| C | 3.55040 | 1 | 4.63950 | 1 | 0.42510 | 1 |
| C | 2.37300 | 1 | 5.27670 | 1 | -0.03340 | 1 |
| O | 2.41200 | 1 | 6.64790 | 1 | 0.00000 | 1 |
| C | 1.22550 | 1 | 7.32910 | 1 | -0.40650 | 1 |
| C | 7.11830 | 1 | 0.89490 | 1 | -0.57290 | 1 |
| C | 6.96040 | 1 | -1.18730 | 1 | 0.61580 | 1 |
| C | 7.74990 | 1 | -0.19470 | 1 | 0.03210 | 1 |
| C | 3.53360 | 1 | -3.15810 | 1 | -0.58340 | 1 |
| C | 1.46830 | 1 | -3.13310 | 1 | 0.68780 | 1 |
| C | 3.53580 | 1 | -4.54650 | 1 | -0.55200 | 1 |
| C | 1.48630 | 1 | -4.52460 | 1 | 0.73370 | 1 |
| C | 2.52230 | 1 | -5.24570 | 1 | 0.12450 | 1 |
| C | 2.55700 | 1 | -6.69600 | 1 | 0.12520 | 1 |
| C | 2.24360 | 1 | -7.50400 | 1 | 1.16330 | 1 |
| C | 1.86060 | 1 | -7.04030 | 1 | 2.45290 | 1 |
| C | 2.30860 | 1 | -8.92150 | 1 | 1.02220 | 1 |
| C | 0.00000 | 1 | 0.00000 | 1 | 0.00000 | 1 |
| H | 0.48000 | 1 | 2.52200 | 1 | -0.79500 | 1 |
| H | 4.51960 | 1 | 2.76640 | 1 | 0.80800 | 1 |
| H | 0.35480 | 1 | 5.00490 | 1 | -0.81930 | 1 |
| H | 4.38570 | 1 | 5.25340 | 1 | 0.79040 | 1 |
| H | 1.49170 | 1 | 8.40820 | 1 | -0.27200 | 1 |
| H | 0.36690 | 1 | 7.04700 | 1 | 0.24970 | 1 |
| H | 0.99590 | 1 | 7.10680 | 1 | -1.47660 | 1 |
| H | 5.18560 | 1 | 1.80720 | 1 | -1.08190 | 1 |
| H | 4.90230 | 1 | -1.83650 | 1 | 1.05870 | 1 |
| H | 7.70030 | 1 | 1.69870 | 1 | -1.05080 | 1 |
| H | 8.84830 | 1 | -0.26910 | 1 | 0.04670 | 1 |
| H | 7.41350 | 1 | -2.06500 | 1 | 1.10380 | 1 |
| O | -0.57420 | 1 | 0.82590 | 1 | -0.75660 | 1 |
| O | -0.56240 | 1 | -0.81990 | 1 | 0.76850 | 1 |
| H | 4.31950 | 1 | -2.62670 | 1 | -1.13970 | 1 |
| H | 0.62380 | 1 | -2.56040 | 1 | 1.13050 | 1 |
| H | 4.33510 | 1 | -5.10400 | 1 | -1.06330 | 1 |
| H | 0.66560 | 1 | -5.05890 | 1 | 1.23920 | 1 |
| H | 2.88760 | 1 | -7.15560 | 1 | -0.82720 | 1 |
| N | 1.56330 | 1 | -6.67930 | 1 | 3.51810 | 1 |
| N | 2.36130 | 1 | -10.07750 | 1 | 0.90580 | 1 |

*************************************************

AM1 calculated heats of formation and gradient norms.

| Molecule | Hf /  kJ mol-1 | GN |
| --- | --- | --- |
| C1 | 219.2 | 2.3 |
| C2 | 547.0 | 2.6 |
| C3 | 398.1 | 2.0 |
| C4 | 736.9 | 1.8 |
| C5 | 44.4 | 1.4 |
| C6 | 366.2 | 1.2 |
| C7 | 224.8 | 1.4 |
| C8 | 560.2 | 1.9 |
| C9 | 314.7 | 2.6 |
| C10 | 609.3 | 1.2 |
| C11 | 491.7 | 1.6 |
| C12 | 809.5 | 0.9 |
| C13 | 159.7 | 1.1 |
| C14 | 466.1 | 1.8 |
| C15 | 341.1 | 1.1 |
| C16 | 653.9 | 2.8 |
| B1 | -5.5 | 1.9 |
| B2 | 334.9 | 1.5 |
| B3 | 179.0 | 1.8 |
| B4 | 510.8 | 2.4 |
| B5 | -188.5 | 1.1 |
| B6 | 123.9 | 2.3 |
| B7 | -19.9 | 1.8 |
| B8 | 309.2 | 0.9 |
| B9 | 80.7 | 2.2 |
| B10 | 412.4 | 2.2 |
| B11 | 264.1 | 1.2 |
| B12 | 600.9 | 1.8 |
| B13 | -100.8 | 1.9 |
| B14 | 217.0 | 2.8 |
| B15 | 68.3 | 1.2 |
| B16 | 402.8 | 1.2 |

| Molecule | Hf /  kJ mol-1 | GN |
| --- | --- | --- |
| P1 | 977.8 | 2.8 |
| P2 | 1293.9 | 3.0 |
| P3 | 1151.1 | 2.7 |
| P4 | 1466.8 | 2.9 |
| P5 | 795.1 | 2.4 |
| P6 | 1105.2 | 2.7 |
| P7 | 962.2 | 3.1 |
| P8 | 1281.0 | 2.7 |
| P9 | 1075.2 | 2.7 |
| P10 | 1394.4 | 2.6 |
| P11 | 1242.0 | 2.3 |
| P12 | 1553.0 | 2.5 |
| P13 | 879.0 | 2.1 |
| P14 | 1201.9 | 2.8 |
| P15 | 1061.5 | 2.5 |
| P16 | 1370.2 | 3.3 |
| D1 | 463.3 | 2.6 |
| D2 | 781.8 | 1.5 |
| D3 | 655.3 | 1.7 |
| D4 | 989.1 | 2.3 |
| D5 | 276.2 | 1.4 |
| D6 | 599.9 | 3.0 |
| D7 | 468.7 | 2.8 |
| D8 | 801.5 | 3.1 |
| D9 | 575.6 | 1.9 |
| D10 | 896.0 | 2.9 |
| D11 | 778.4 | 1.9 |
| D12 | 1079.1 | 2.3 |
| D13 | 369.2 | 1.9 |
| D14 | 691.9 | 2.3 |
| D15 | 567.4 | 1.4 |
| D16 | 877.2 | 2.7 |

Comparison of ****** and ****** from AM1 and *ab initio* (HF/6-31G* at AM1 optimised geometry) calculations. Using the NOSYMM command, the orientation is fixed in the *ab initio* calculation as in the AM1 calculation for the dipole moment calculation. Due to the standard orientation in which the  is calculated in the *ab initio* method, the ****** vector is directed opposite to the one obtained from the AM1 method. Hence the  calculated from one method is nearly 180 –  from the other.

| Molecule | Method | x / D | y / D | z / D |  / D | x / au. | y / au. | z / au. |  / esu |  (o) |
| --- | --- | --- | --- | --- | --- | --- | --- | --- | --- | --- |
| C1 | AM1 | 18.114 | 7.969 | 0.196 | 19.790 | -295.1 | 288.9 | 1.0 | 3.6 | 111.9 |
|  | HF/6-31G* | 18.483 | 7.472 | 0.160 | 19.937 | 283.7 | -222.6 | -3.2 | 3.1 | 60.1 |
| B1 | AM1 | 20.437 | 7.037 | 1.481 | 21.665 | -773.8 | 1265.6 | 75.4 | 12.9 | 102.2 |
|  | HF/6-31G* | 21.168 | 6.399 | 1.251 | 22.150 | 575.2 | -693.7 | -62.1 | 7.8 | 67.5 |
